# Supplementary material
Source: PubMed Central journal article supplement (PMC5902791)
Supplement: id7b00197_si_001.pdf [file id7b00197_si_001.pdf]

## SUPPORTING INFORMATION

### Fragment-Based Screening of a Natural Product Library against 62 Potential Malaria Drug Targets Employing Native Mass Spectrometry

Hoan Vu,<sup>†</sup> Liliana Pedro,<sup>†</sup> Tin Mak,<sup>†</sup> Brendan McCormick,<sup>†</sup> Jessica Rowley,<sup>†</sup> Miaomiao Liu,<sup>†</sup> Angela Di Capua,<sup>†</sup> Billy Williams-Noonan,<sup>†</sup> Ngoc B. Pham,<sup>†</sup> Rebecca Pouwer,<sup>†</sup> Bao Nguyen,<sup>†</sup> Katherine T. Andrews,<sup>†</sup> Tina Skinner-Adams,<sup>†</sup> Jessica Kim,<sup>‡</sup> Wim G. J. Hol,<sup>‡</sup> Raymond Hui,<sup>§</sup> Gregory J. Crowther,<sup>⊥</sup> Wesley C. Van Voorhis,<sup>⊥</sup> and Ronald J. Quinn\*,<sup>†</sup>

<sup>†</sup>Griffith Institute for Drug Discovery, Griffith University, 170 Kessels Rd, Nathan, Queensland 4111, Australia

<sup>‡</sup>Department of Biochemistry, University of Washington, 1705 NE Pacific St., Seattle, Washington 98195-7350, United States

<sup>§</sup>Structural Genomics Consortium, University of Toronto, MaRS South Tower, 7th floor 101 College St. Toronto, Ontario M5G 1L7, Canada

<sup>⊥</sup>Department of Medicine, University of Washington, 1705 NE Pacific St., Seattle, Washington 98195-7350, United States

## CONTENTS:

Figures S1. Mean physicochemical properties of different fragment libraries.

Figure S2. The distribution of fragment hit scaffolds present within different libraries.

Table S1. List of proteins studied for cloning and expression.

Table S2. List of proteins studied by Native mass spectrometry.

Table S3. List of detected hits and their anti-malarial activity.

Figure S3. Mass spectra of 62 *Plasmodium* proteins.

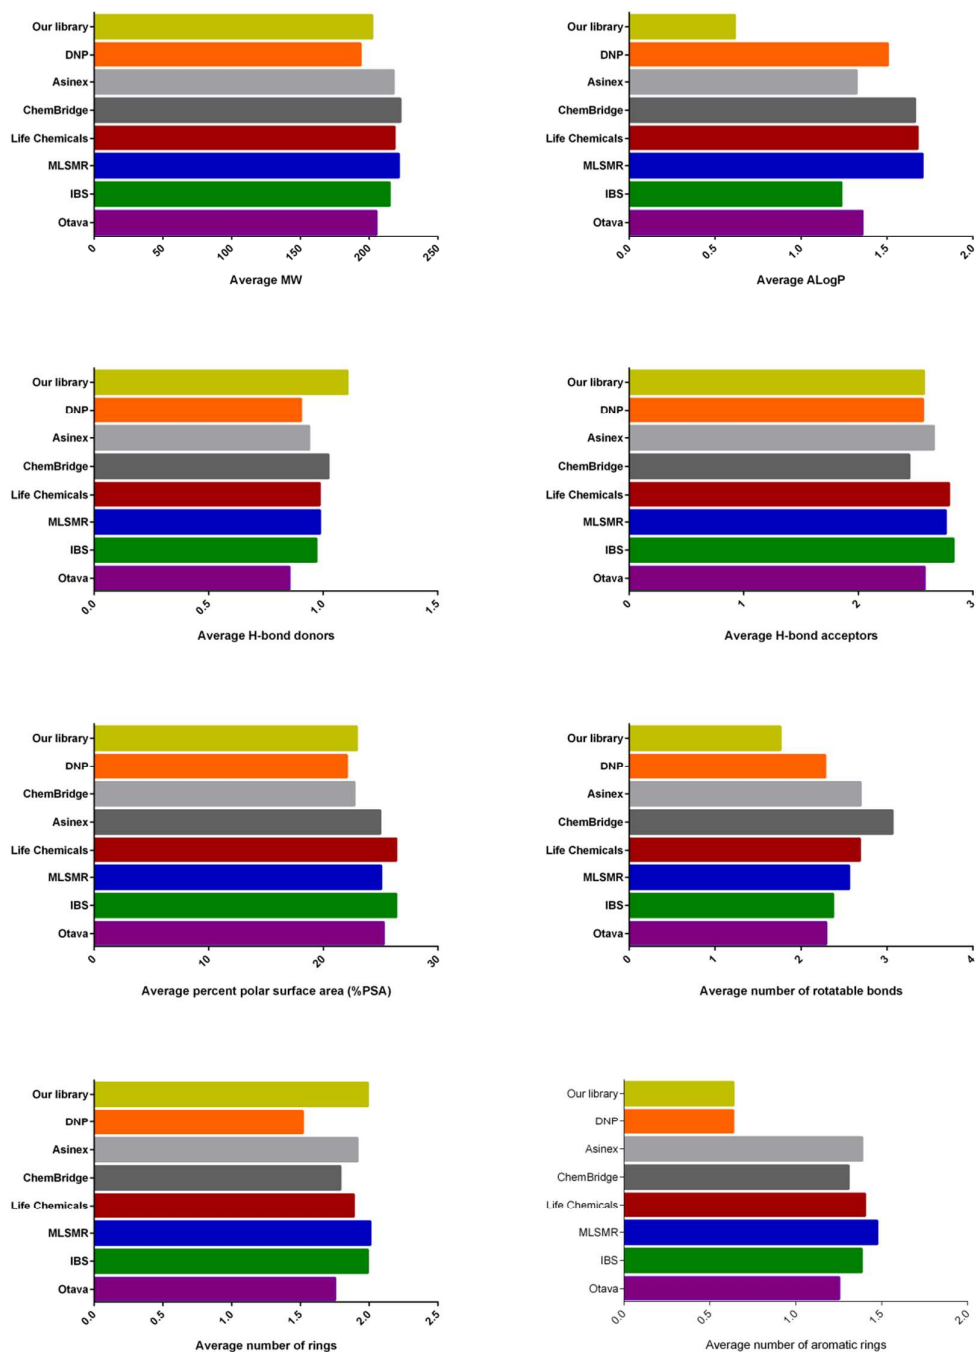

**Figure S1.** Mean physicochemical properties of different fragment libraries. Dictionary of Natural Products (DNP) and our fragment libraries are natural product-based fragment libraries. Asinex, ChemBridge, InterBioscreen (IBS), Life Chemicals and Otava fragment libraries are from commercially available libraries. Molecular Libraries Small Molecule Repository (MLSMR) fragment library is from the US national screening collection where most of the molecules are commercially sourced.

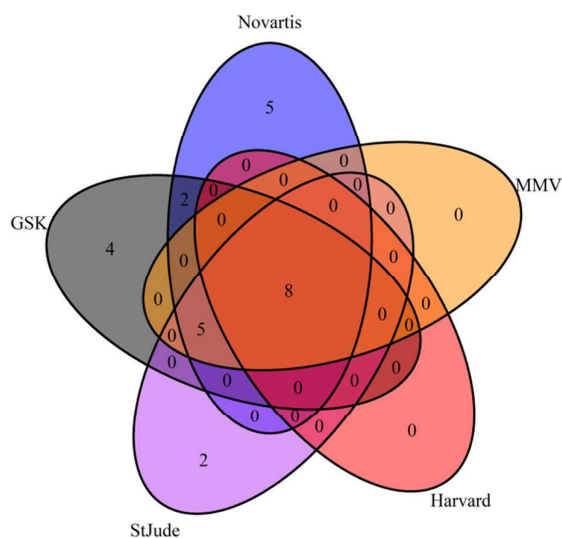

**Figure S2.** Venn diagram depicting the number of fragment hit scaffolds present within the molecular structures of GSK, Harvard Medical School (Harvard), St. Jude’s Children’s Research Hospital (StJude), MMV and Novartis library members. Diagram produced with R software (<http://www.R-project.org/>)<sup>1</sup>, package “VennDiagram” (<http://CRAN.R-project.org/package=VennDiagram>)<sup>2</sup>

**Table S1.** List of forty-nine proteins studied for cloning and expression. Thirteen out of the forty-nine proteins were successfully cloned, expressed and purified.

| <b>Protein name/function</b>                                                       | <b>PlasmoDB ID</b> | <b>Purified</b> |
|------------------------------------------------------------------------------------|--------------------|-----------------|
| 3-oxoacyl-(acyl-carrier-protein) reductase (FabG)                                  | PF3D7_0922900      | No              |
| 6-pyruvoyltetrahydropterin synthase (6PTPS)                                        | PF3D7_0628000      | Yes             |
| Actin-related protein (ARP)                                                        | PF3D7_0103800      | No              |
| Adenylate cyclase-associated protein, putative (C-terminal actin binding domain)   | PF3D7_0105300      | No              |
| ADP-ribosylation factor                                                            | PF3D7_1316200      | No              |
| Alpha-tubulin 2                                                                    | PF3D7_0422300      | No              |
| ARK1                                                                               | PF3D7_0605300      | No              |
| Beta-hydroxyacyl-ACP dehydratase precursor (FabZ)                                  | PF3D7_1323000      | No              |
| Beta-ketoacyl-acyl carrier protein synthase III precursor (FabH/FabB/KASIII)       | PF3D7_0211400      | No              |
| cAMP-dependent protein kinase (PKA)                                                | PF3D7_0934800      | No              |
| Casein kinase 2                                                                    | PF3D7_1108400      | No              |
| CDK-related protein kinase 6 (PfPK6)                                               | PF3D7_1337100      | Yes             |
| CDP-DAG synthase (CDS)                                                             | PF3D7_1409900      | No              |
| CelTOS (cell traversal protein for ookinetes and sporozoites)                      | PF3D7_1216600      | Yes             |
| Chitinase                                                                          | PF3D7_1252200      | No              |
| Conserved Plasmodium protein, unknown function                                     | PF3D7_0818600      | No              |
| Conserved Plasmodium protein, unknown function (CITH; CAR-1/Trailer Hitch Homolog) | PF3D7_1474900      | No              |
| CSP (circumsporozoite surface protein)                                             | PF3D7_0304600      | Yes             |
| Dihydrofolate reductase (DHFR)                                                     | PF3D7_0417200      | Yes             |
| Dihydroorotase                                                                     | PF3D7_1472900      | No              |
| DOZI (development of zygote inhibited)                                             | PF3D7_0320800      | No              |
| dUTPase                                                                            | PF3D7_1127100      | Yes             |
| ETRAMP10.3                                                                         | PF3D7_1016900      | No              |
| Fructose-bisphosphate aldolase                                                     | PF3D7_1444800      | No              |
| Glyceraldehyde-3-phosphate dehydrogenase                                           | PF3D7_1462800      | Yes             |
| HMGB2 (high mobility group protein 2) -- transcription factor                      | PF3D7_0817900      | Yes             |
| HU homolog                                                                         | PF3D7_0904700      | Yes             |
| Hypothetical protein                                                               | PF3D7_0313200      | No              |
| Hypothetical secreted protein                                                      | PF3D7_1360000      | No              |
| Hypoxanthine phosphoribosyltransferase                                             | PF3D7_1012400      | Yes             |
| MDV-1/Peg3                                                                         | PF3D7_1216500      | Yes             |
| Membrane-associated histidine-rich protein-2 (MAHRP2)                              | PF3D7_1353200      | No              |
| Methionine tRNA synthetase                                                         | PF3D7_1442300      | No              |

|                                                                                        |               |      |
|----------------------------------------------------------------------------------------|---------------|------|
| Nek2 (NIMA-related kinase 2)                                                           | PF3D7_0525900 | No   |
| Nek4 (NIMA-related kinase 4)                                                           | PF3D7_0719200 | No   |
| Nucleosome assembly protein NapS                                                       | PF3D7_0919000 | No   |
| Orotate phosphoribosyltransferase                                                      | PF3D7_0512700 | No   |
| pbs36 homologue (P36)                                                                  | PF3D7_0404400 | No   |
| PK7 (Serine/threonine protein kinase)                                                  | PF3D7_0213400 | No   |
| O-sialoglycoprotein endopeptidase                                                      | PF3D7_0708300 | No   |
| Protein kinase                                                                         | PF3D7_1316000 | No   |
| Rhomboid protease ROM1                                                                 | PF3D7_1114100 | No   |
| Secreted ookinete protein, putative (PSOP13,<br>putative secreted ookinete protein 13) | PF3D7_0518800 | No   |
| Serine hydroxymethyltransferase                                                        | PF3D7_1235600 | No   |
| Sexual stage-specific precursor (Pfs16)                                                | PF3D7_0406200 | Yes  |
| Signal Peptide Peptidase (SPP)                                                         | PF3D7_1457000 | No   |
| SPECT1 (sporozoite microneme protein essential<br>for cell traversal)                  | PF3D7_1342500 | No   |
| Spermidine synthase                                                                    | PF3D7_1129000 | Yes  |
| Thymidylate synthase                                                                   | PF3D7_0417200 | Yes* |

\*Same sequence with dihydrofolate reductase (DHFR).

**Table S2.** List of seventy-nine proteins studied by native mass spectrometry. Sixty-two out of the seventy-nine proteins were visible at native MS.

| No | Protein Name                                                       | ID            | EC number | MW     |
|----|--------------------------------------------------------------------|---------------|-----------|--------|
| 1  | Thioredoxin peroxidase 2 (Trx-Px2)                                 | PF3D7_1215000 | 1.11.1.15 | 18,526 |
| 2  | Thioredoxin                                                        | PF3D7_1330000 | 1.8.1.8   | 24,275 |
| 3  | NADP-specific glutamate dehydrogenase (GDH1)                       | PF3D7_1416500 | 1.4.1.4   | 50,240 |
| 4  | Glycerol-3-phosphate dehydrogenase                                 | PF3D7_1216200 | 1.1.1.8   | 42,133 |
| 5  | Superoxide dismutase (SOD)                                         | PKH_142350    | 1.15.1.1  | 24,976 |
| 6  | Branched-chain alpha keto-acid dehydrogenase                       | PF3D7_1312600 | 1.2.4.4   | 55,125 |
| 7  | Thioredoxin 1 (TRX1)                                               | PF3D7_1457200 | 1.8.1.8   | 12,607 |
| 8  | Glyceraldehyde-3-phosphate dehydrogenase                           | PF3D7_1462800 | 1.2.1.12  | 37,530 |
| 9  | N-myristoyltransferase (NMT)                                       | PF3D7_1412800 | 2.3.1.97  | 49,935 |
| 10 | Ribosomal RNA methyltransferase                                    | PF3D7_1309600 | 2.1.1.56  | 25,539 |
| 11 | Phosphomethylpyrimidine kinase (PMPK)                              | PF3D7_0520500 | 2.7.4.7   | 35,861 |
| 12 | Guanylate kinase                                                   | PVX_099895    | 2.7.4.8   | 23,544 |
| 13 | Spermidine synthase                                                | PF3D7_1129000 | 2.5.1.16  | 34,421 |
| 14 | Uridine phosphorylase (purine nucleoside phosphorylase)            | PF3D7_0513300 | 2.4.2.1   | 19,554 |
| 15 | CDK-related protein kinase 6 (PfPK6)                               | PF3D7_1337100 | 2.7.11.22 | 37,995 |
| 16 | Phosphoglycerate kinase (PGK)                                      | PF3D7_0922500 | 2.7.2.3   | 46,325 |
| 17 | Aspartate carbamoyltransferase                                     | PVX_083135    | 2.1.3.2   | 47,102 |
| 18 | RAB18 GTPase                                                       | PF3D7_0807300 | 3.6.5.2   | 21,757 |
| 19 | Adenosine deaminase (ADA)                                          | PVX_111245    | 3.5.4.4   | 42,816 |
| 20 | dUTPase                                                            | PF3D7_1127100 | 3.6.1.23  | 20,340 |
| 21 | 6-phosphogluconolactonase                                          | PF3D7_1453800 | 3.1.1.31  | 41,005 |
| 22 | RAB1a GTPase                                                       | PF3D7_1320600 | 3.6.5.2   | 23,241 |
| 23 | Ubiquitin carboxyl-terminal hydrolase isozyme L3(UCHL3)            | PF3D7_1460400 | 3.4.19.12 | 27,790 |
| 24 | Methionine aminopeptidase 1b (METAP1b, MAP1)                       | PF3D7_1015300 | 3.4.11.18 | 37,932 |
| 25 | S-adenosylhomocysteine hydrolase (SAHH)                            | PF3D7_0520900 | 3.3.1.1   | 54,733 |
| 26 | ATP-dependent DNA helicase Q1 (RECQ1)                              | PF3D7_0918600 | 3.6.4.12  | 12,576 |
| 27 | Adenosine deaminase (ADA)                                          | PF3D7_1029600 | 3.5.4.4   | 44,666 |
| 28 | ATP-dependent Clp protease proteolytic subunit (ClpP)              | PF3D7_0307400 | 3.4.21.92 | 23,552 |
| 29 | Glyoxalase I                                                       | PF3D7_1113700 | 4.4.1.5   | 23,775 |
| 30 | Adenylosuccinate lyase                                             | PVX_003765    | 4.3.2.2   | 47,094 |
| 31 | Deoxyribose-phosphate aldolase                                     | PY02252       | 4.1.2.4   | 31,101 |
| 32 | Orotidine 5' monophosphate decarboxylase (OMPDC)                   | PF3D7_1023200 | 4.1.1.23  | 38,760 |
| 33 | 6-pyruvoyltetrahydropterin synthase                                | PF3D7_0628000 | 4.2.3.12  | 20,953 |
| 34 | 2C-methyl-D erythritol 2,4-cyclodiphosphate synthase (IspF)        | PVX_003920    | 4.6.1.12  | 22,388 |
| 35 | Phosphoglycerate mutase (PGM)                                      | PF3D7_1120100 | 5.4.2.1   | 29,662 |
| 36 | Cyclophilin                                                        | PF3D7_0528700 | 5.2.1.8   | 24,263 |
| 37 | Ribose 5-phosphate epimerase                                       | PF3D7_0514600 | 5.3.1.6   | 27,072 |
| 38 | D-ribulose- 5-phosphate 3-epimerase                                | PF3D7_1219900 | 5.1.3.1   | 25,780 |
| 39 | Prolyl tRNA ligase (aPRS)                                          | PF3D7_0925300 | 6.1.1.15  | 58,213 |
| 40 | Ubiquitin conjugating enzyme E2                                    | PF3D7_0305700 | 6.3.2.19  | 17,886 |
| 41 | Adenylosuccinate synthetase (AdSS)                                 | PF3D7_1354500 | 6.3.4.4   | 51,461 |
| 42 | Tryptophan tRNA ligase                                             | PF3D7_1336900 | 6.1.1.2   | 47,746 |
| 43 | Ubiquitin conjugating enzyme E2                                    | PF3D7_1203900 | 6.3.2.19  | 17,431 |
| 44 | Ubiquitin conjugating enzyme E2 N                                  | PF3D7_0527100 | 6.3.2.19  | 19,176 |
| 45 | Ubiquitin conjugating enzyme                                       | PF3D7_0812600 | 6.3.2.19  | 19,554 |
| 46 | Ubiquitin conjugating enzyme                                       | PF3D7_1033900 | 6.3.2.19  | 19,288 |
| 47 | Ubiquitin conjugating enzyme                                       | PF3D7_1356300 | 6.3.2.19  | 23,776 |
| 48 | MTIP                                                               | PF3D7_1246400 | NA        | 16,482 |
| 49 | Bacterial histone-like protein (HU homolog)                        | PF3D7_0904700 | NA        | 17,403 |
| 50 | Phosphatidylethanolamine-binding protein                           | PVX_123630    | NA        | 45,604 |
| 51 | Dynein light chain 1                                               | PF3D7_1213600 | NA        | 11,544 |
| 52 | CSP (circumsporozoite surface protein)                             | PF3D7_0304600 | NA        | 26,787 |
| 53 | Conserved protein, unknown function                                | PF3D7_1351100 | NA        | 19,603 |
| 54 | Vacuolar protein-sorting protein (VPS2)                            | PF3D7_0816200 | NA        | 25,721 |
| 55 | Eukaryotic translation initiation factor 5A (eIF5a)                | PF3D7_1204300 | NA        | 18,529 |
| 56 | 6-pyruvoyltetrahydropterin synthase                                | PVX_114505    | 4.2.3.12  | 21,975 |
| 57 | Sexual stage-specific protein precursor (Pfs16)-PF0310w            | PF3D7_0406200 | NA        | 9,200  |
| 58 | Cell traversal protein for ookinetes and sporozoites (CelTOS)      | PF3D7_1216600 | NA        | 17,683 |
| 59 | Hypoxanthine-guanine phosphoribosyltransferase (HGPR1)             | PF3D7_1012400 | 2.4.2.8   | 26,660 |
| 60 | High mobility group protein B2 (HMGB2)                             | PF3D7_0817900 | NA        | 10,107 |
| 61 | Orotate phosphoribosyltransferase, putative                        | PKNH_1020400  | 2.4.2.10  | 34,802 |
| 62 | Serine/threonine-protein kinase NEK4, putative                     | PVX_096360    | 2.7.11.1  | 37,077 |
| 63 | Eukaryotic translation initiation factor 2b (eIF2b), alpha subunit | PF3D7_0828500 | NA        | NA     |
| 64 | Thioredoxin reductase                                              | PF3D7_0923800 | 1.8.1.9   | NA     |
| 65 | Ribonucleotide reductase, small subunit                            | PVX_086155    | 1.17.4.1  | NA     |
| 66 | Proline carboxylate reductase                                      | PF3D7_1357900 | 1.5.1.2   | NA     |
| 67 | Dihydrofolate reductase (DHFR)                                     | PF3D7_0417200 | 1.5.1.3   | NA     |

|    |                                                       |                |          |    |
|----|-------------------------------------------------------|----------------|----------|----|
| 68 | Superoxide dismutase [Fe] (SOD)                       | PBANKA_1422700 | 1.15.1.1 | NA |
| 69 | S-adenosylmethionine synthetase (SAMS)                | PF3D7_0922200  | 2.5.1.6  | NA |
| 70 | Ornithine aminotransferase                            | PY00104        | 2.6.1.13 | NA |
| 71 | Nucleoside diphosphate kinase B (NDK)                 | PF3D7_1366500  | 2.7.4.6  | NA |
| 72 | Protein-L-isoaspartate O-methyltransferase            | PF3D7_1432700  | 2.1.1.77 | NA |
| 73 | Choline Kinase                                        | PF3D7_1401800  | 2.7.1.32 | NA |
| 74 | Geranylgeranyl pyrophosphate synthase (GGPPS)         | PVX_092040     | 2.5.1.29 | NA |
| 75 | Nucleosome assembly protein 1                         | PKNH_1303500   | NA       | NA |
| 76 | Conserved protein, unknown function                   | PF3D7_0618200  | NA       | NA |
| 77 | Male development gene 1 (MDV1/MDV-1/Peg3)             | PF3D7_1216500  | NA       | NA |
| 78 | Male development gene 1 (MDV1/MDV-1/Peg3)             | PVX_123505     | NA       | NA |
| 79 | Protein phosphatase 1, regulatory (inhibitor) subunit | PVX_111140     | NA       | NA |

**Table S3.** List of 96 detected hits and their anti-malarial activity.

| Compound | Name                                                       | % Inh at 100 $\mu$ M | IC <sub>50</sub> ( $\mu$ M)<br><i>P. falciparum</i> asexual (3D7) | IC <sub>50</sub> ( $\mu$ M)<br><i>P. falciparum</i> | Sources                                                                                                                                                                                                                   |
|----------|------------------------------------------------------------|----------------------|-------------------------------------------------------------------|-----------------------------------------------------|---------------------------------------------------------------------------------------------------------------------------------------------------------------------------------------------------------------------------|
| 1        | Indole-3-butyric acid                                      |                      |                                                                   |                                                     | Widespread in plants <sup>3</sup>                                                                                                                                                                                         |
| 2        | 6-Acetamido-6-deoxy-castanospermine                        | 44                   |                                                                   |                                                     | <i>Castanospermum austral</i> , <i>Alexa leiopetala</i> (castanospermine) <sup>4</sup>                                                                                                                                    |
| 3        | Patulin                                                    | 98                   | 91.6                                                              |                                                     | <i>Aspergillus clavatus</i> , <i>Aspergillus terreus</i> , <i>Aspergillus varians</i> , <i>Penicillium patulum</i> , <i>Penicillium griseofulvum</i> , <i>Byssoschlamys nivea</i> <sup>5</sup>                            |
| 4        | Santonin                                                   | 9                    | -                                                                 |                                                     | <i>Artemisia</i> spp. <sup>4,6</sup>                                                                                                                                                                                      |
| 5        | Piceatannol                                                | 92                   | >100                                                              | 120                                                 | <i>Vouacapoua macropetala</i> , <i>Pericopsis angolensis</i> <i>Vaccinium</i> sp. <i>Picea abies</i> <sup>7,8</sup>                                                                                                       |
| 6        | Resveratrol                                                | 60                   | >100                                                              | 60                                                  | <i>Veratrum grandiflorum</i> , <i>Pinus sibirica</i> , <i>Vitis vinifera</i> , <i>Arachis hypogaea</i> , <i>Polygonum</i> spp., <i>Nothofagus</i> spp., <i>Cudrania javanensis</i> , <i>Eucalyptus</i> spp. <sup>9</sup>  |
| 7        | Acivicin                                                   | 94                   | 5.4                                                               |                                                     | <i>Streptomyces sviveus</i> <sup>10</sup>                                                                                                                                                                                 |
| 8        | Citrinin                                                   | 63                   | >100                                                              |                                                     | <i>Penicillium citrinum</i> , <i>Guanomyces polythrix</i> , <i>Aspergillus terreus</i> , <i>Monascus</i> spp. <sup>11</sup>                                                                                               |
| 9        | Cantharidin                                                | 61                   | >100                                                              | 9                                                   | <i>Epicauta</i> spp., <i>Lytta vesicatoria</i> <sup>12</sup>                                                                                                                                                              |
| 10       | trans-parthenolide                                         | 96                   | >100                                                              |                                                     | <i>Chrysanthemum parthenium</i> , <i>Michelia champaca</i> , <i>Michelia nilagirica</i> , <i>Michelia compressa</i> <sup>13-15</sup>                                                                                      |
| 11       | (-)-Huperazine                                             |                      |                                                                   |                                                     | <i>Lycopodium serratum</i> ( <i>Huperzia serrata</i> ), <i>Lycopodium selago</i> , <i>Lycopodium saururus</i> , <i>Lycopodium erythraeum</i> , <i>Lycopodium gnidioides</i> , <i>Paecilomyces tenuis</i> <sup>16,17</sup> |
| 12       | 2,5-Dihydro-4-hydroxy-5-oxo-3-phenyl-2-furanpropanoic acid | 9                    | -                                                                 |                                                     | <i>Acremonium</i> sp., <i>Chaetomella raphigera</i> <sup>18</sup>                                                                                                                                                         |
| 13       | Phaeofuran B                                               | 19                   | -                                                                 |                                                     | <i>Phaeoacremonium</i> sp. <sup>19</sup>                                                                                                                                                                                  |
| 14       | Curcumenol                                                 | 66                   | >100                                                              |                                                     | <i>Curcuma zedoaria</i> , <i>Curcuma longa</i> <sup>20</sup>                                                                                                                                                              |
| 15       | 2 – Hydroxylantolactone                                    | 98                   | 44.3                                                              |                                                     | <i>Francoeuria crispa</i> , <i>Inula helenium</i> , <i>Inula royleana</i> <sup>21</sup>                                                                                                                                   |
| 16       | (+)-reynosin                                               | 98                   | 32.3                                                              |                                                     | <i>Magnolia grandiflora</i> , <i>Tanacetum praeterium</i> , <i>Saussurea lappa</i> , <i>Ambrosia confertiflora</i> <sup>22</sup>                                                                                          |
| 17       | Asperilin                                                  | 98                   | 23.2                                                              |                                                     | <i>Iva texensis</i> , <i>Telekia speciosa</i> , <i>Iva asperifolia</i> , <sup>23</sup>                                                                                                                                    |
| 18       | Graveolide                                                 | 84                   | 15.6                                                              |                                                     | <i>Inula graveolens</i> <sup>21</sup>                                                                                                                                                                                     |
| 19       | Xanthinosin (or tomentosin)                                | 65                   | 62.8                                                              |                                                     | <i>Dittrichia</i> spp., <i>Inula</i> spp., <i>Pulicaria</i> spp., <i>Xanthium</i> spp. <sup>24</sup>                                                                                                                      |
| 20       | Pinnatifidin                                               | 92                   | 66.5                                                              |                                                     | <i>Helenium pinnatifidum</i> <sup>25</sup>                                                                                                                                                                                |
| 21       | Homononactic acid                                          | 30                   | -                                                                 |                                                     | <i>Streptomyces</i> spp. <sup>26</sup>                                                                                                                                                                                    |



|    |                                                                                              |     |      |                                                                                                                                                                                                                                                                                                                                                                                                                                          |
|----|----------------------------------------------------------------------------------------------|-----|------|------------------------------------------------------------------------------------------------------------------------------------------------------------------------------------------------------------------------------------------------------------------------------------------------------------------------------------------------------------------------------------------------------------------------------------------|
| 22 | Curdionolide B                                                                               | 42  | -    | <i>Curcuma wenyujin</i> <sup>27</sup>                                                                                                                                                                                                                                                                                                                                                                                                    |
| 23 | Neolitacumone B                                                                              | 27  | -    | <i>Neolitsea acuminatissima</i> <sup>28</sup>                                                                                                                                                                                                                                                                                                                                                                                            |
| 24 | $\beta$ -Santonin                                                                            | 37  | -    | <i>Artemisia</i> spp. <sup>29</sup>                                                                                                                                                                                                                                                                                                                                                                                                      |
| 25 | Acremine I                                                                                   | 43  | -    | <i>Acremonium byssoides</i> strain A20 <sup>30</sup>                                                                                                                                                                                                                                                                                                                                                                                     |
| 26 | Asteriscunolide A                                                                            | 68  | 34.2 | <i>Asteriscus aquaticus</i> , <i>Asteriscus graveolens</i> ,<br><i>Asteriscus vogelii</i> <sup>31</sup>                                                                                                                                                                                                                                                                                                                                  |
| 27 | Arteannuin B                                                                                 | 98  | 6.6  | <i>Artemisia annua</i> <sup>32</sup>                                                                                                                                                                                                                                                                                                                                                                                                     |
| 28 | Xerantholide                                                                                 | 96  | 38.3 | <i>Anthemis austriaca</i> , <i>Decachaeta thieleana</i> ,<br><i>Xeranthemum cylindraceum</i> <sup>33</sup>                                                                                                                                                                                                                                                                                                                               |
| 29 | 1-Epi-inuviscolide                                                                           | 100 | 79.4 | <i>Dittrichia graveolens</i> <sup>34</sup>                                                                                                                                                                                                                                                                                                                                                                                               |
| 30 | Camphanic acid                                                                               | 23  | -    | <i>Fagaropsis glabra</i> <sup>35</sup>                                                                                                                                                                                                                                                                                                                                                                                                   |
| 31 | Fraxinellonone                                                                               | 31  | -    | <i>Fagaropsis glabra</i> <sup>35</sup>                                                                                                                                                                                                                                                                                                                                                                                                   |
| 32 | Dihydrokawain-5-ol                                                                           | 14  | -    | <i>Piper methysticum</i> <sup>36</sup>                                                                                                                                                                                                                                                                                                                                                                                                   |
| 33 | Costunolide                                                                                  | 35  | -    | <i>Saussurea lappa</i> , <i>Artemisia balchanorum</i> ,<br><i>Talauma ovata</i> , <i>Talauma mexicana</i> ,<br><i>Liriodendron tulipifera</i> , <i>Frullania tamarischii</i> ,<br><i>Frullania nisquallensis</i> , <i>Michelia</i> spp.,<br><i>Magnolia grandiflora</i> , <i>Magnolia sieboldii</i> ,<br><i>Gochnatia foliosa</i> , <i>Chrysanthemum boreale</i> ,<br><i>Cosmos caudatus</i> , <i>Cosmos sulphureus</i> <sup>37-39</sup> |
| 34 | Antibiotic 927A                                                                              | 23  | -    | <i>Streptomyces griseus</i> <sup>40</sup>                                                                                                                                                                                                                                                                                                                                                                                                |
| 35 | Methyl ester of 3-Chloro-1,5-dihydroxy-4-oxo-2-(1-propenyl)-2-cyclopentene-1-carboxylic acid | 98  | 67.3 | <i>Cryptosporiopsis</i> spp. <sup>41</sup>                                                                                                                                                                                                                                                                                                                                                                                               |
| 36 | Santamarine                                                                                  | 96  | 61.3 | <i>Magnolia grandiflora</i> L. <sup>42</sup>                                                                                                                                                                                                                                                                                                                                                                                             |
| 37 | Zaluzanin C                                                                                  | 99  | 93.6 | <i>Conocephalum conicum</i> , <i>Zaluzania</i> spp.,<br><i>Zaluzania robinsonii</i> <sup>43</sup>                                                                                                                                                                                                                                                                                                                                        |
| 38 | Derivative of Antibiotic EI 1941-2                                                           | 20  | -    | Antibiotic EI 1941-2 was found in<br><i>Phomopsis</i> sp. (strain No. 7233) <sup>44</sup>                                                                                                                                                                                                                                                                                                                                                |
| 39 | Alantolactone                                                                                | 92  | 92.7 | <i>Inula helenium</i> , <i>Inula racemosa</i> , <i>Inula grandis</i> ,<br><i>Inula magnifica</i> , <i>Saussurea lappa</i> , <i>Codonocephalum grande</i> ,<br><i>Abutilon indicum</i> <sup>45</sup>                                                                                                                                                                                                                                      |
| 40 | Isoalantolactone                                                                             | 50  | 39.8 | <i>Inula helenium</i> , <i>Inula racemosa</i> , <i>Abutilon indicum</i> ,<br><i>Telekia speciosa</i> <sup>46</sup>                                                                                                                                                                                                                                                                                                                       |
| 41 | 5-Fluoro-3,4-dihydro-2,4-dioxo-1(2H)-pyrimidineacetic acid                                   | 27  | -    | <i>Phakellia fusca</i> <sup>47</sup>                                                                                                                                                                                                                                                                                                                                                                                                     |
| 42 | Biotin                                                                                       | 44  | -    | yeast, eggs, liver, various microorganisms,<br>sweet corn seedlings, leaves of <i>Raphanus sativus</i> <sup>48</sup>                                                                                                                                                                                                                                                                                                                     |
| 43 | 12-Methoxycarbonylcytisine                                                                   |     |      | <i>Leontice watereri</i> , <i>Petteria ramentacea</i> <sup>49</sup>                                                                                                                                                                                                                                                                                                                                                                      |
| 44 | Lepiotin C                                                                                   | 25  | -    | <i>Macrolepiota neomastoidea</i> <sup>50</sup>                                                                                                                                                                                                                                                                                                                                                                                           |
| 45 | N-Benzoyl of 4-Piperidinone                                                                  | 33  | -    | <i>Dichilus strictus</i> , <i>Dichilus reflexus</i> , <i>Dichilus lebeckioides</i> ,<br><i>Dichilus pilosus</i> , <i>Dichilus gracilis</i> <sup>51</sup>                                                                                                                                                                                                                                                                                 |

|    |                                                                                            |     |      |  |                                                                                                                                                                                                                                                                                                                                                  |
|----|--------------------------------------------------------------------------------------------|-----|------|--|--------------------------------------------------------------------------------------------------------------------------------------------------------------------------------------------------------------------------------------------------------------------------------------------------------------------------------------------------|
| 46 | cis-parthenolide                                                                           | 76  | 20.5 |  | <i>Chrysanthemum parthenium</i> , <i>Michelia champaca</i> , <i>Michelia nilagirica</i> , <i>Michelia compressa</i> , <i>Chrysanthemum parthenium</i> , <i>Ambrosia dymosa</i> , <i>Magnolia grandiflora</i> , <i>Artemisia</i> spp., <i>Tanacetum parthenianum</i> , <i>Paramichelia baillonii</i> , <i>Acanthopanax koreanum</i> <sup>14</sup> |
| 47 | Isofischeric acid                                                                          |     |      |  | <i>Neolitsea fischeri</i> <sup>52</sup>                                                                                                                                                                                                                                                                                                          |
| 48 | Thymidine                                                                                  | 34  | -    |  | <i>Phaseolus vulgaris</i> , <i>Acanthaster planci</i> , <i>Cryptochiton stelleri</i> , <i>Pavonaria finmarchica</i> <sup>53</sup>                                                                                                                                                                                                                |
| 49 | 1-Aminocyclopropanecarboxylic acid                                                         |     |      |  | <i>Ethylene</i> spp. <sup>54</sup>                                                                                                                                                                                                                                                                                                               |
| 50 | 7-amino deacetoxy cephalosporanic acid                                                     | 40  | -    |  | <i>Acremonium chrysogenum</i> <sup>55</sup>                                                                                                                                                                                                                                                                                                      |
| 51 | Fenchone                                                                                   | 48  | -    |  | <i>Foeniculum vulgare</i> , <i>Blumea lacera</i> , <i>Prunella vulgaris</i> <sup>56, 57</sup>                                                                                                                                                                                                                                                    |
| 52 | Eseroline                                                                                  | 100 | 20.2 |  | Physostigmine was found in <i>Physostigma venenosum</i> , <i>Streptomyces</i> sp. AH-4, <i>Streptomyces pseudogriseolus</i> <sup>58</sup>                                                                                                                                                                                                        |
| 53 | N-tert-butylloxycarbonyl derivative of homoproline                                         | 30  | -    |  | <i>Arnica montana</i> , <i>Arnica chamissonis</i> ssp. <i>foliosa</i> , <i>Arnica amplexicaulis</i> , <i>Arnica sachalinensis</i> , <i>Tussilago farfara</i> <sup>59</sup>                                                                                                                                                                       |
| 54 | N-tert-butylloxycarbonyl derivative of 2-piperidinecarboxylic acid                         | 22  | -    |  | <i>Amphiroa beauvoisii</i> , <i>Acacia rigidula</i> <sup>60</sup>                                                                                                                                                                                                                                                                                |
| 55 | Aloperine                                                                                  | 43  | -    |  | <i>Sophora alopecuroides</i> <sup>61</sup>                                                                                                                                                                                                                                                                                                       |
| 56 | Lycoperodine 1                                                                             | 49  | -    |  | <i>Aleurites fordii</i> , <i>Allium tuberosum</i> , <i>Asterias rollestoni</i> , <i>Lycopersicon esculentum</i> <sup>62</sup>                                                                                                                                                                                                                    |
| 57 | N,N-dipropylsuccinamic acid                                                                |     |      |  |                                                                                                                                                                                                                                                                                                                                                  |
| 58 | Derivative of matlystatins, 4-oxo-4-(piperidin-1-yl)butanoic acid                          | 24  | -    |  | <i>Actinomadura atramentaria</i> <sup>63</sup>                                                                                                                                                                                                                                                                                                   |
| 59 | Derivative of pyroglutamic acid, (S)-1-(2-amino-2-oxoethyl)-5-oxopyrrolidine-2-carboxamide | 24  | -    |  | Ginseng (pyroglutamic acid) <sup>64</sup>                                                                                                                                                                                                                                                                                                        |
| 60 | 1,2,3,4-Tetrahydro-6,7-dihydroxy-3-isoquinolinecarboxylic acid                             | 26  | -    |  | <i>Mucuna mutisiana</i> (Leguminosae), <i>Mucuna urens</i> , <i>Mucuna deeringiana</i> , <i>Mucuna andreana</i> , <i>Mucuna holtoni</i> , <i>Mucuna pruriens</i> , <i>Mucuna sloanei</i> , <i>Stizolobium hassjoo</i> <sup>65</sup>                                                                                                              |
| 61 | Derivative of almazolone, (Z)-2-methyl-4-(4-methylbenzylidene)oxazol-5(4H)-one             | 33  | -    |  | Almazolone was found in <i>Haraldiophyllum</i> sp. <sup>66</sup>                                                                                                                                                                                                                                                                                 |

|    |                                                                                                                                  |    |      |  |                                                                                                                                                                                                                           |
|----|----------------------------------------------------------------------------------------------------------------------------------|----|------|--|---------------------------------------------------------------------------------------------------------------------------------------------------------------------------------------------------------------------------|
| 62 | <i>O</i> -Methyl-L-tyrosine                                                                                                      |    |      |  | <i>Cylindrocladium scoparium</i> <sup>67</sup>                                                                                                                                                                            |
| 63 | <i>N,N</i> -diethyl-4-hydroxy- benzamide                                                                                         |    |      |  | Synthetic? <sup>68</sup>                                                                                                                                                                                                  |
| 64 | Diethylamide of 3-hydroxybenzoic acid                                                                                            |    |      |  | Synthetic? <sup>69</sup>                                                                                                                                                                                                  |
| 65 | Derivative of dysinosin A, 5-( <i>S</i> )-acetyl-9-( <i>S</i> )-hydroxy- (3 <i>R</i> , 7 <i>R</i> )-octahydro-1 <i>H</i> -Indole | 31 | -    |  | Dysinosin A was found in <i>Citronia astra</i> <sup>70</sup>                                                                                                                                                              |
| 66 | <i>N,N</i> -diethylsuccinamic acid                                                                                               | 40 | -    |  | <i>Candida tropicalis</i> , <i>Candida</i> sp., <i>Saccharomyces cerevisiae</i> , <i>Xanthomonas campestris</i> , <i>Pseudomonas putida</i> , <i>Xanthomonas campestris oryzae</i> , <i>Gerbera</i> sp. <sup>71, 72</sup> |
| 67 | Derivative of almazolone, 4-[(2-methyl-5-oxo-4(5 <i>H</i> )-oxazolylidene)methyl] - benzoic acid                                 | 41 | -    |  | Almazolone was found in <i>Haraldiophyllum</i> sp. <sup>66</sup>                                                                                                                                                          |
| 68 | Derivative of almazolone, 4-methyl-2-( <i>p</i> -hydroxyphenylmethylene)- 5(2 <i>H</i> )-Oxazolone                               | 35 | -    |  | Almazolone was found in <i>Haraldiophyllum</i> sp. <sup>66</sup>                                                                                                                                                          |
| 69 | Derivative of almazolone, ( <i>E</i> )-methyl 4-((2-methyl-5-oxooxazol-4(5 <i>H</i> )-ylidene)methyl)benzoate                    | 22 | -    |  | Almazolone was found in <i>Haraldiophyllum</i> sp. <sup>66</sup>                                                                                                                                                          |
| 70 | Derivative of almazolone, ( <i>E</i> )-4-(benzodioxol-5-ylmethylene)-2-methyloxazol-5(4 <i>H</i> )-one                           | 15 | -    |  | Almazolone was found in <i>Haraldiophyllum</i> sp. <sup>66</sup>                                                                                                                                                          |
| 71 | Derivative of almazolone, ( <i>E</i> )-4-(4-chlorobenzylidene)-2-methyloxazol-5(4 <i>H</i> )-one                                 | 29 | -    |  | Almazolone was found in <i>Haraldiophyllum</i> sp. <sup>66</sup>                                                                                                                                                          |
| 72 | Derivative of almazolone, ( <i>E</i> )-4-(3,4-dimethoxybenzylidene)-2-methyloxazol-5(4 <i>H</i> )-one                            | 41 | >100 |  | Almazolone was found in <i>Haraldiophyllum</i> sp. <sup>66</sup>                                                                                                                                                          |
| 73 | 5-Methoxytryptophan methyl ester                                                                                                 | 65 | >100 |  | <i>Griffonia simplicifolia</i> , <i>Panaeolus sphinctrinus</i> <sup>73</sup>                                                                                                                                              |
| 74 | Derivative of cichorine, <i>N</i> -(2-(3-                                                                                        | 32 | -    |  | Cichorine was found in <i>Aspergillus silvaticus</i> , <i>Alternaria cichorii</i> <sup>74</sup>                                                                                                                           |

|    |                                                                                                               |     |      |    |                                                                                                                                                                                                                                                  |
|----|---------------------------------------------------------------------------------------------------------------|-----|------|----|--------------------------------------------------------------------------------------------------------------------------------------------------------------------------------------------------------------------------------------------------|
|    | oxoisindolin-1-yl)ethyl)acetamide                                                                             |     |      |    |                                                                                                                                                                                                                                                  |
| 75 | Derivative of astrocasine, 2,3-dihydro-1 <i>H</i> -benzo <sup>36</sup> azepin-1-one                           | 42  | -    |    | Astrocasine was found in <i>Astrocasia phyllanthoides</i> <sup>75</sup>                                                                                                                                                                          |
| 76 | Derivative of astrocasine, 2-acetyl-7-methoxy-2,3,4,5-tetrahydro-1 <i>H</i> -benzo <sup>36</sup> azepin-1-one | 45  | -    |    | Astrocasine was found in <i>Astrocasia phyllanthoides</i> <sup>75</sup>                                                                                                                                                                          |
| 77 | (S)-Stachydine                                                                                                | 26  | -    |    | <i>Capparis tomentosa</i> , <i>Chrysanthemum</i> spp., <i>Citrus</i> spp., <i>Galeopsis grandiflora</i> , <i>Lagochilus hirtus</i> , <i>Medicago sativa</i> , <i>Stachys</i> spp., <i>Aspergillus oryzae</i> <sup>76</sup>                       |
| 78 | Preclathridine A                                                                                              | 100 | 24.5 |    | <i>Notodoris gardineri</i> <sup>77</sup>                                                                                                                                                                                                         |
| 79 | <i>N</i> -Phenylmethylglutamine                                                                               | 57  | >100 |    | <i>Dysoxylum</i> sp. <sup>78</sup>                                                                                                                                                                                                               |
| 80 | (-)-Norsecurinine                                                                                             | 25  | 40.3 |    | <i>Flueggea virosa</i> *, <i>Securinega virosa</i> <sup>79, 80</sup>                                                                                                                                                                             |
| 81 | Allosecurinine                                                                                                |     |      |    | <i>Securinega</i> spp., <i>Securinega suffruticosa</i> <sup>81, 82</sup>                                                                                                                                                                         |
| 82 | L-tryosine                                                                                                    |     |      |    | Widespread in plants                                                                                                                                                                                                                             |
| 83 | <i>N</i> -(1-carboxyethyl)-5-oxoproline                                                                       | 49  | -    |    | <i>Timonius</i> sp. <sup>78</sup>                                                                                                                                                                                                                |
| 84 | New compound 1                                                                                                | 30  | -    |    | <i>Lindera gambleana</i> * <sup>78</sup>                                                                                                                                                                                                         |
| 85 | Methyl gallate                                                                                                | 18  | -    | 38 | <i>Barklya syringifolia</i> *, <i>Koelreuteria paniculata</i> , <i>Euphorbia</i> spp., <i>Geranium</i> spp., <i>Sapium sebiferum</i> , <i>Acacia</i> spp., <i>Spirogyra</i> spp., <i>Rhus glabra</i> , <i>Pelargonium sidoides</i> <sup>83</sup> |
| 86 | Phyllanthine                                                                                                  | 90  | 59.3 |    | <i>Margaritaria dubium-traceyi</i> *, <i>Margaritaria indica</i> , <i>Flueggea leucopyra</i> , <i>Securinega suffruticosa</i> , <i>Phyllanthus discoides</i> <sup>84</sup>                                                                       |
| 87 | 4-Hydroxyallosecurine                                                                                         | 51  | >100 |    | <i>Margaritaria dubium-traceyi</i> *, <i>Phyllanthus niruri</i> <sup>85</sup>                                                                                                                                                                    |
| 88 | Securinine                                                                                                    | 39  | 20.6 |    | <i>Margaritaria dubium-traceyi</i> *, <i>Margaritaria indica</i> , <i>Securinega suffruticosa</i> , <i>Phyllanthus discoides</i> <sup>86</sup>                                                                                                   |
| 89 | Securinine <i>N</i> -oxide                                                                                    |     |      |    | Natural Product Fragment Library <sup>87</sup>                                                                                                                                                                                                   |
| 90 | <i>N</i> -Methyltryptophan                                                                                    | 41  | 79.2 |    | <i>Gastrolobium grandiflorum</i> *, <i>Erythrina caffra</i> , <i>Abrus precatorius</i> , <i>Desmodium tiliaefolium</i> <sup>88</sup>                                                                                                             |
| 91 | 1-Prenyl-6 <i>N</i> -methylisoguanine (new)                                                                   | 35  | -    |    | <i>Glochidion zeylanicum</i> <sup>78</sup>                                                                                                                                                                                                       |
| 92 | New compound 2                                                                                                |     |      |    | <sup>78</sup>                                                                                                                                                                                                                                    |
| 93 | Gentianol                                                                                                     |     |      |    | <i>Swertia</i> spp. <sup>89</sup>                                                                                                                                                                                                                |
| 94 | Derivative of grandisine E                                                                                    |     |      |    | Grandisine E was found in <i>Elaeocarpus grandis</i> <sup>90</sup>                                                                                                                                                                               |
| 95 | 5-Methoxydictamnine                                                                                           |     |      |    | <i>Ruta chalepensis</i> var. <i>latifolia</i> (Rutaceae) <sup>91</sup>                                                                                                                                                                           |
| 96 | 2-Amino-1-phenylethanol                                                                                       |     |      |    | <i>Halostachys caspica</i> (Chenopodiaceae) <sup>92</sup>                                                                                                                                                                                        |

**Figure S3.** Mass spectra of 62 *Plasmodium* proteins

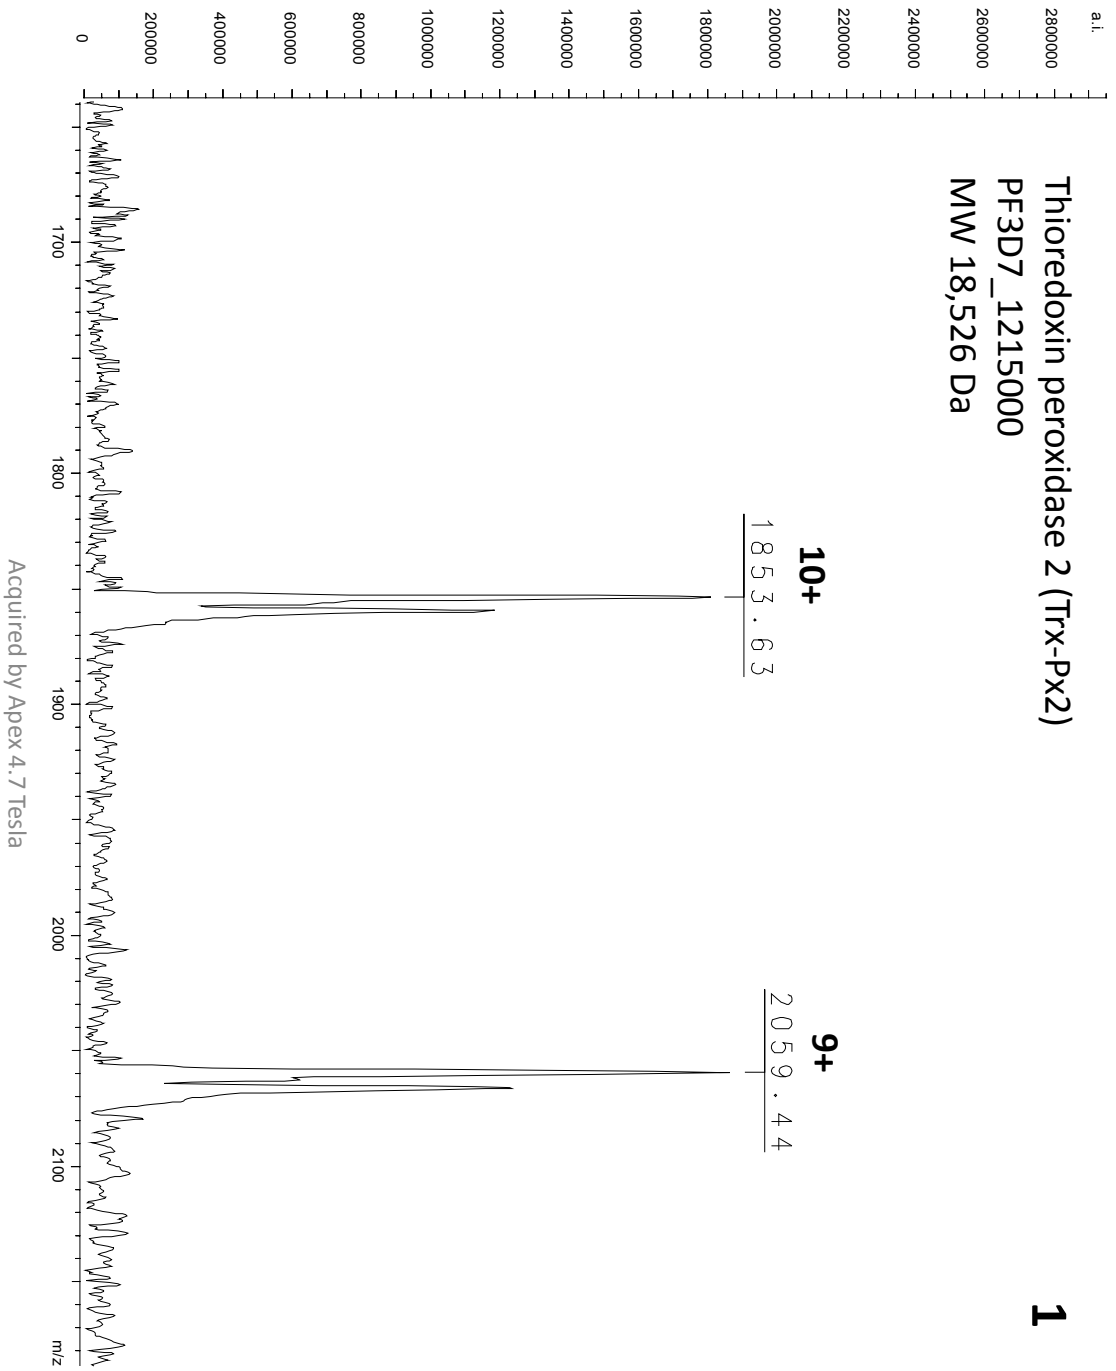

2

Thioredoxin  
PF3D7\_1330000  
MW 24,275 Da

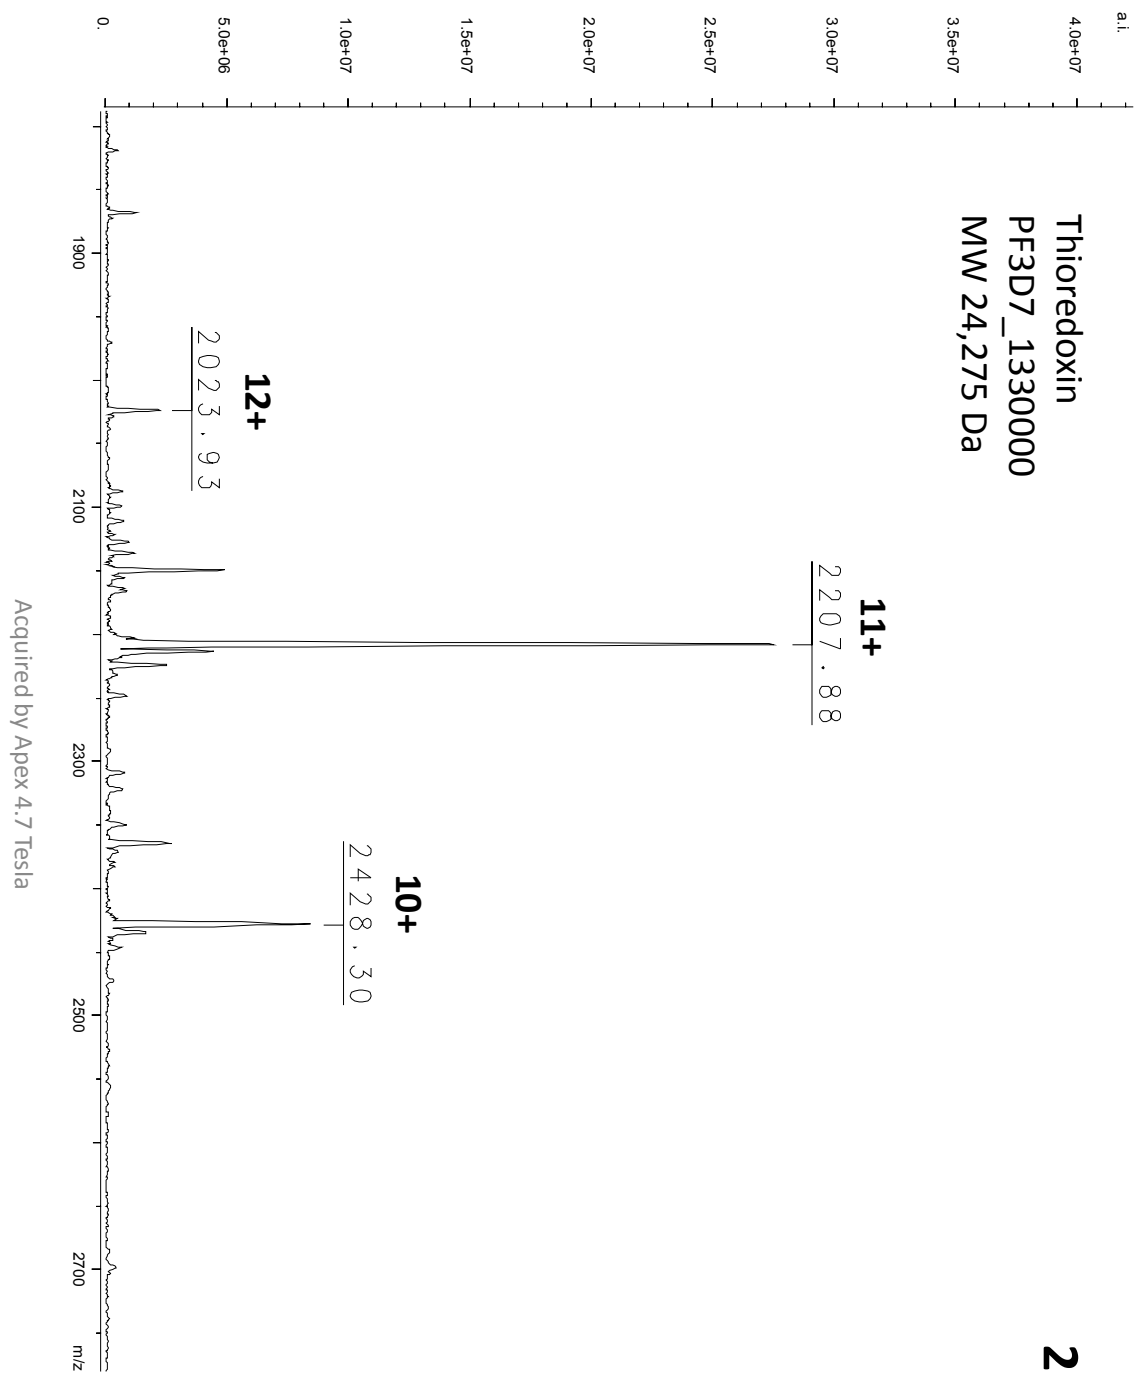

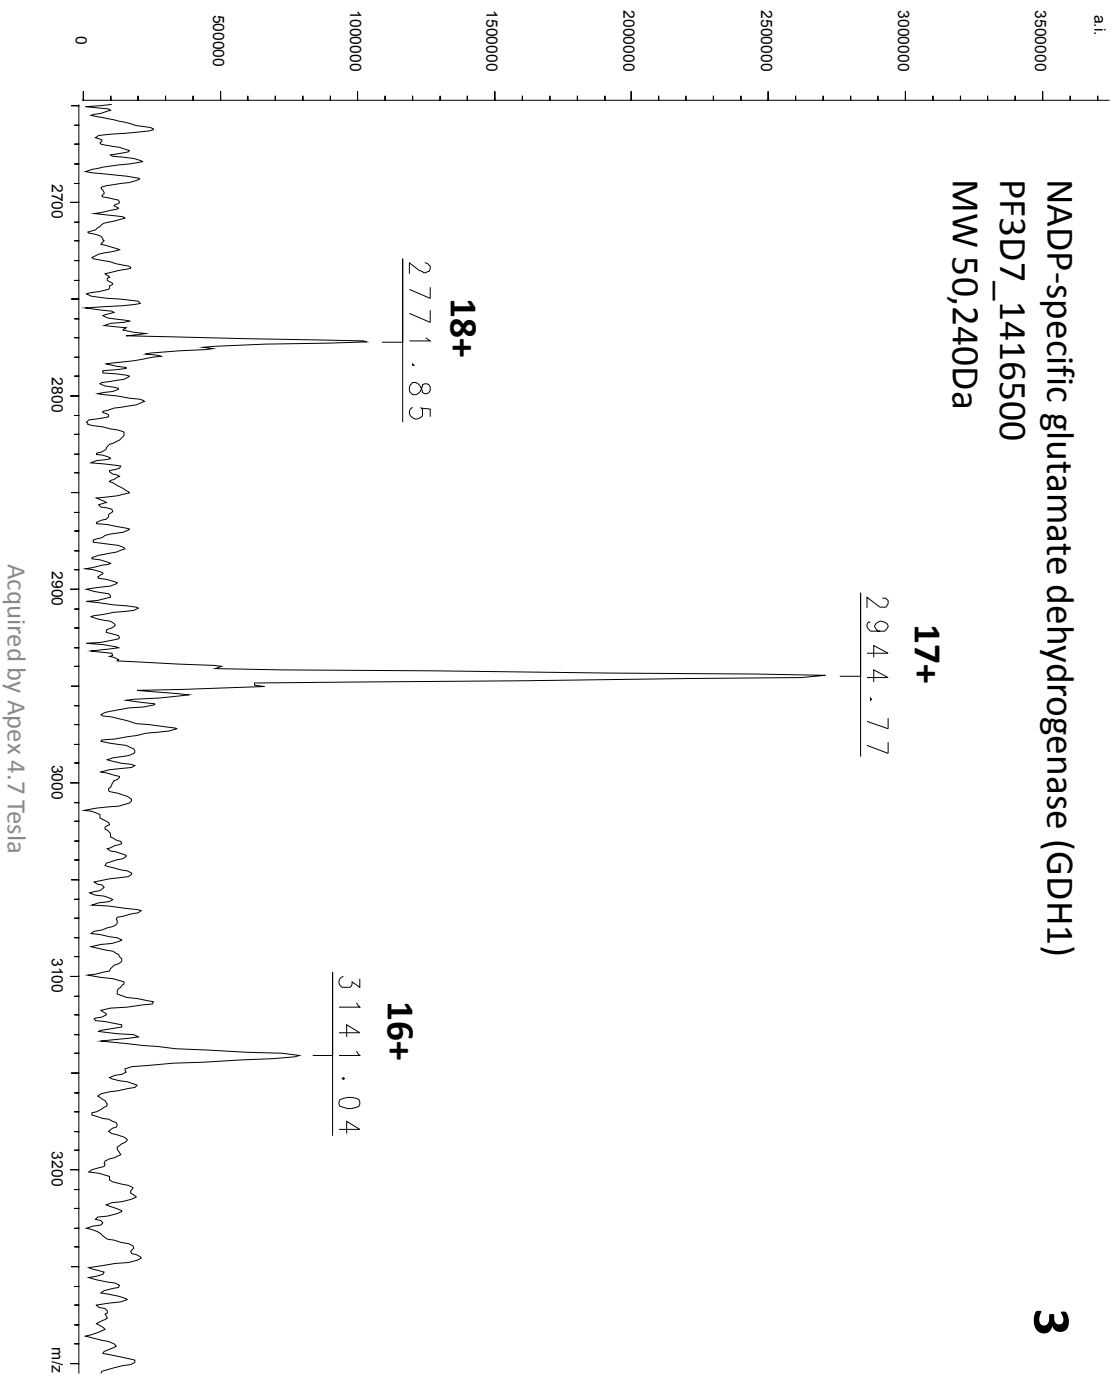



Glycerol-3-phosphate dehydrogenase  
PF3D7\_1216200  
MW 42,133 Da

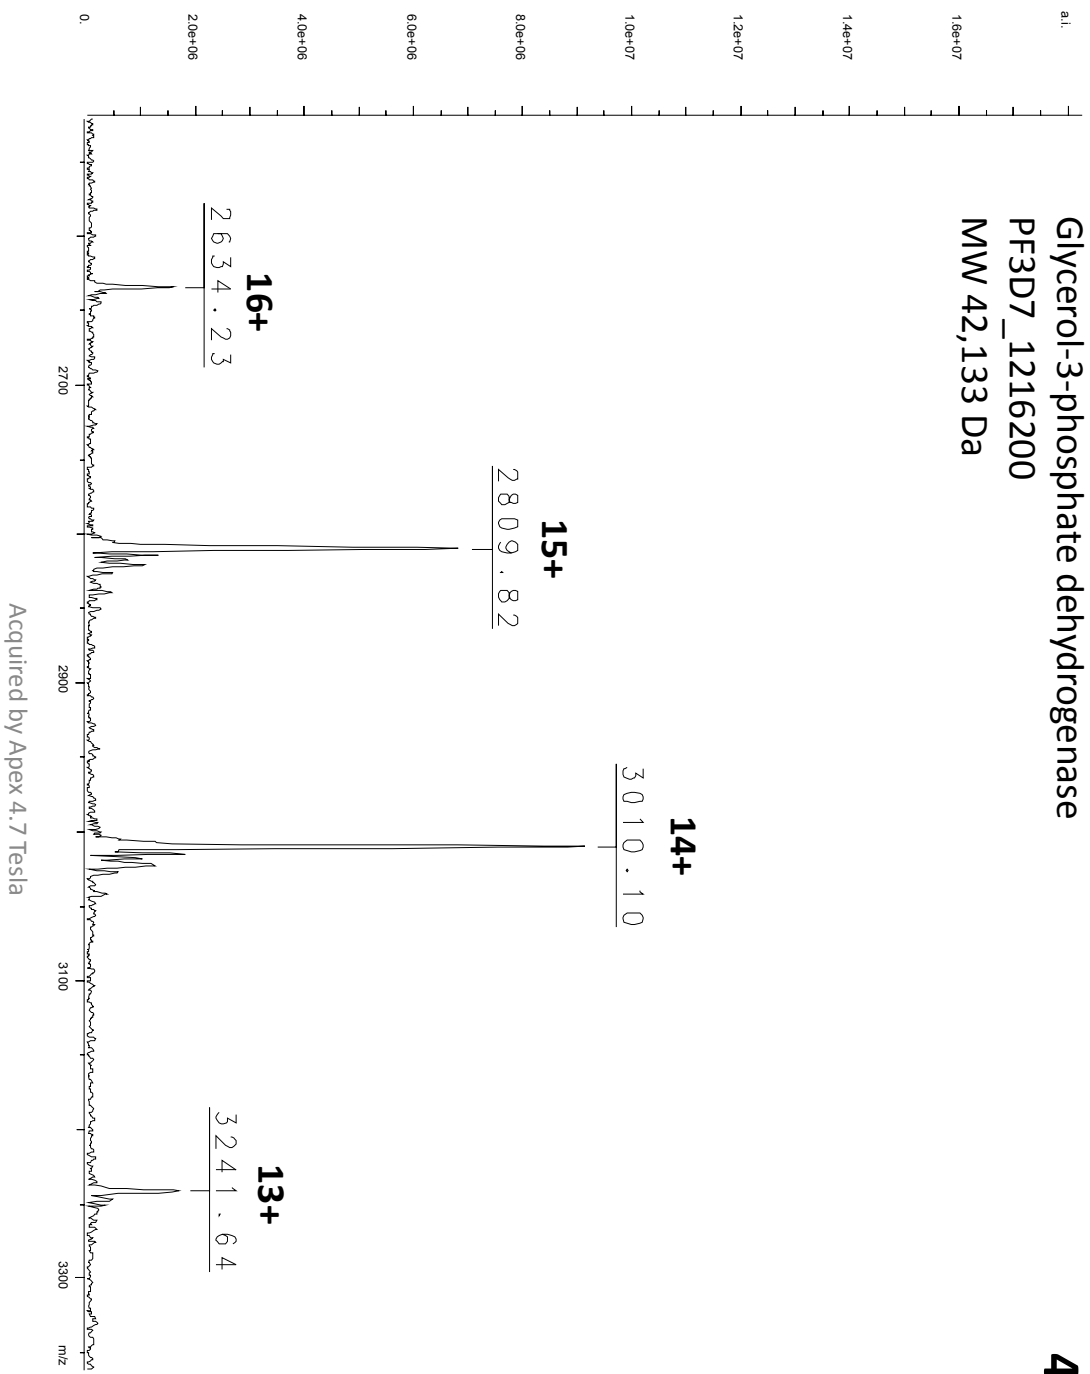

5

Superoxide dismutase (SOD)  
PKH\_142350  
MW 24,976 Da

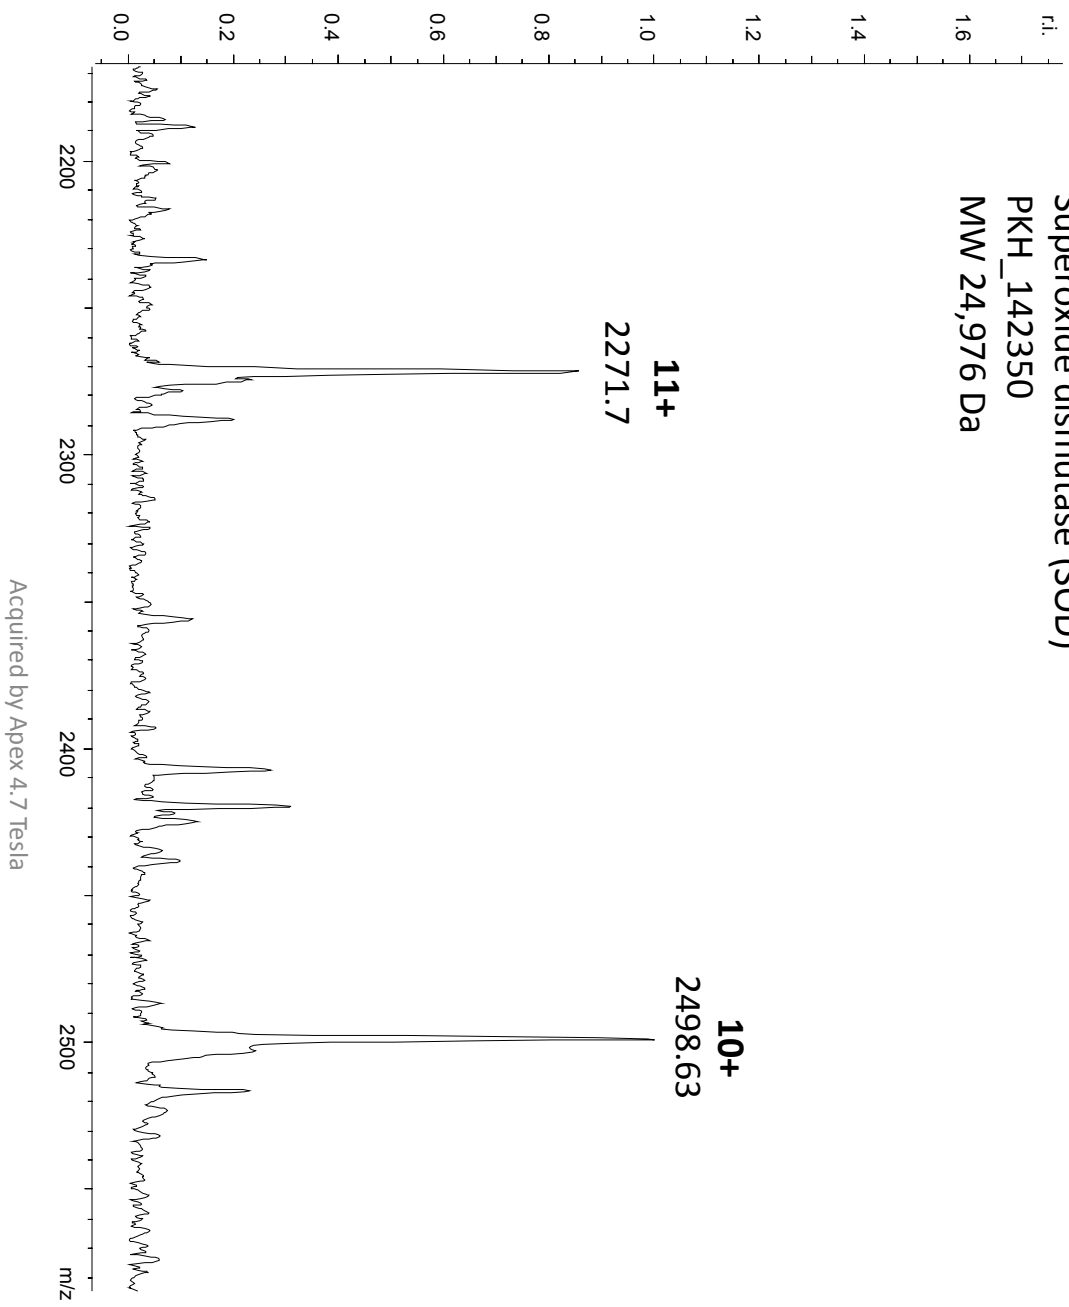

branched-chain alpha keto-acid dehydrogenase (BCKDHA)  
PF3D7\_1312600  
MW 55,125 Da

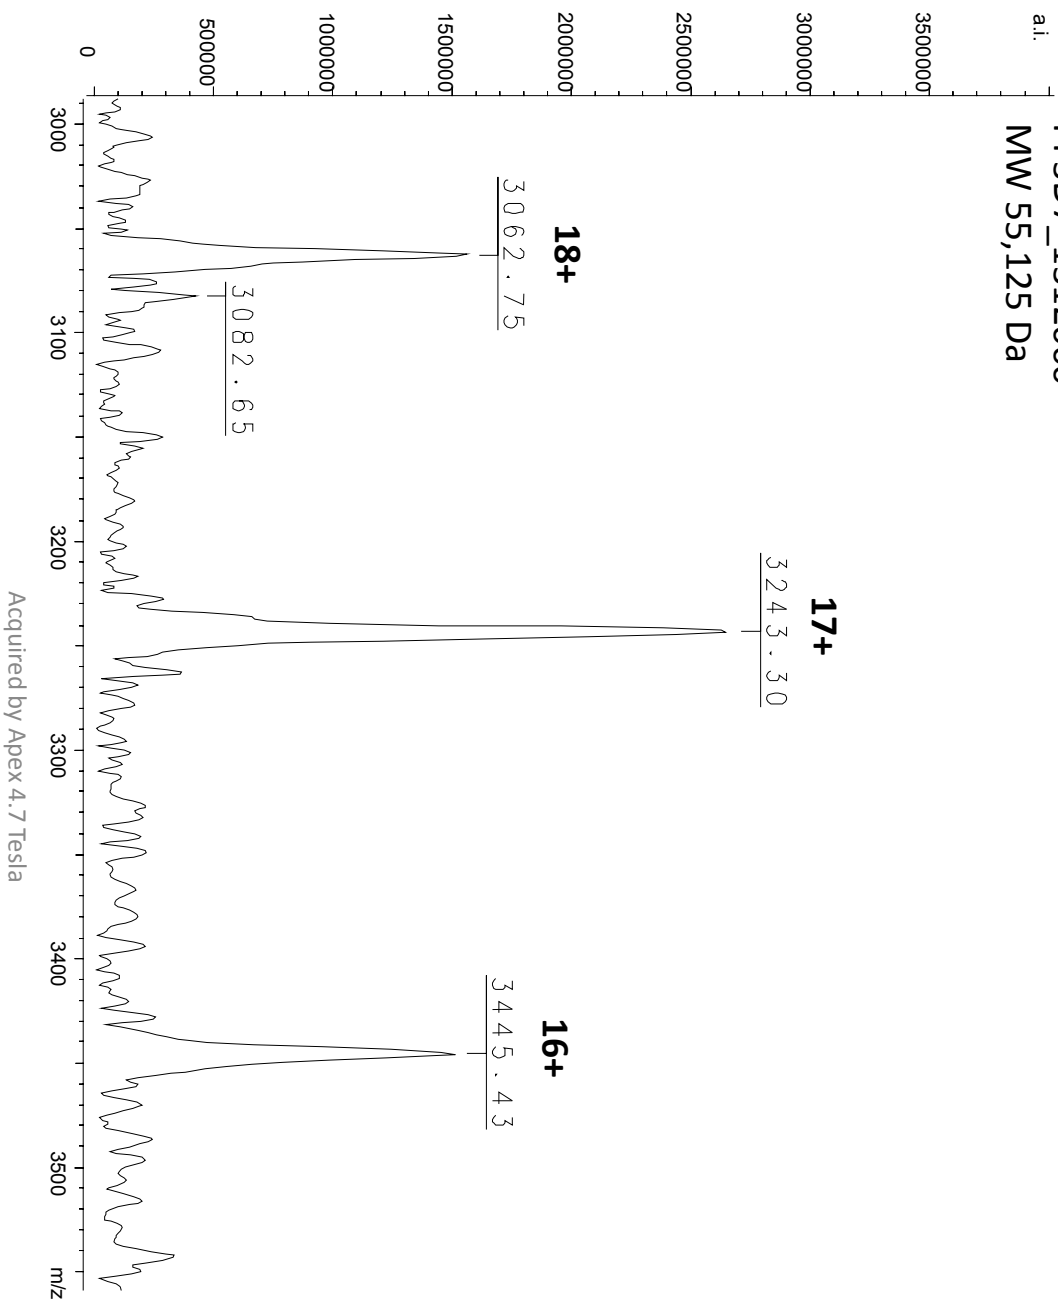

a.l.  
1.5e+07  
1.4e+07  
1.3e+07  
1.2e+07  
1.1e+07  
1.0e+07  
9.0e+06  
8.0e+06  
7.0e+06  
6.0e+06  
5.0e+06  
4.0e+06  
3.0e+06  
2.0e+06  
1.0e+06  
0

Thioredoxin 1 (TRX1)  
PF3D7\_1457200  
MW 12,607 Da

**7**

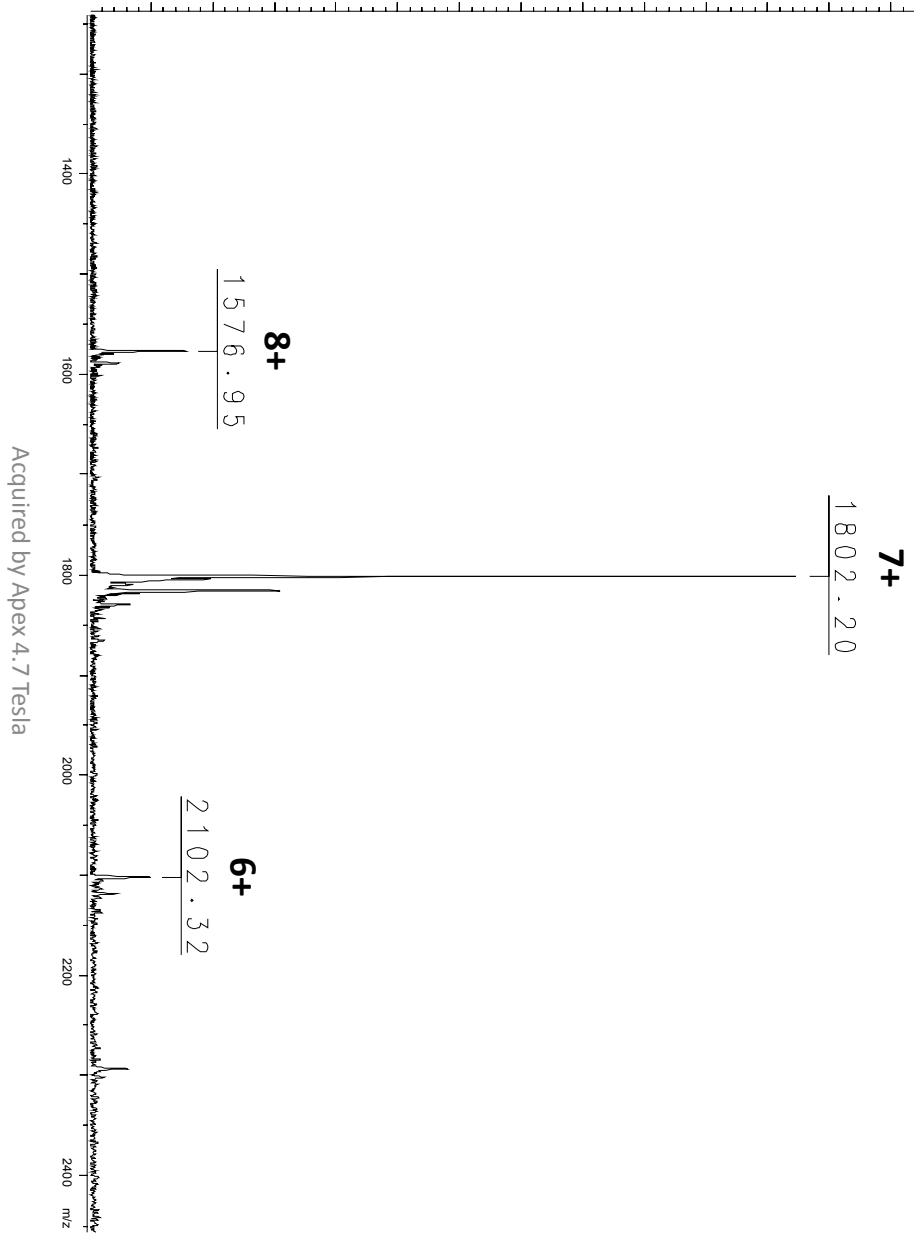

a.i. **Glyceraldehyde-3-phosphate dehydrogenase (GAPDH)** **8**

PF3D7\_1462800  
MW 37,530 Da

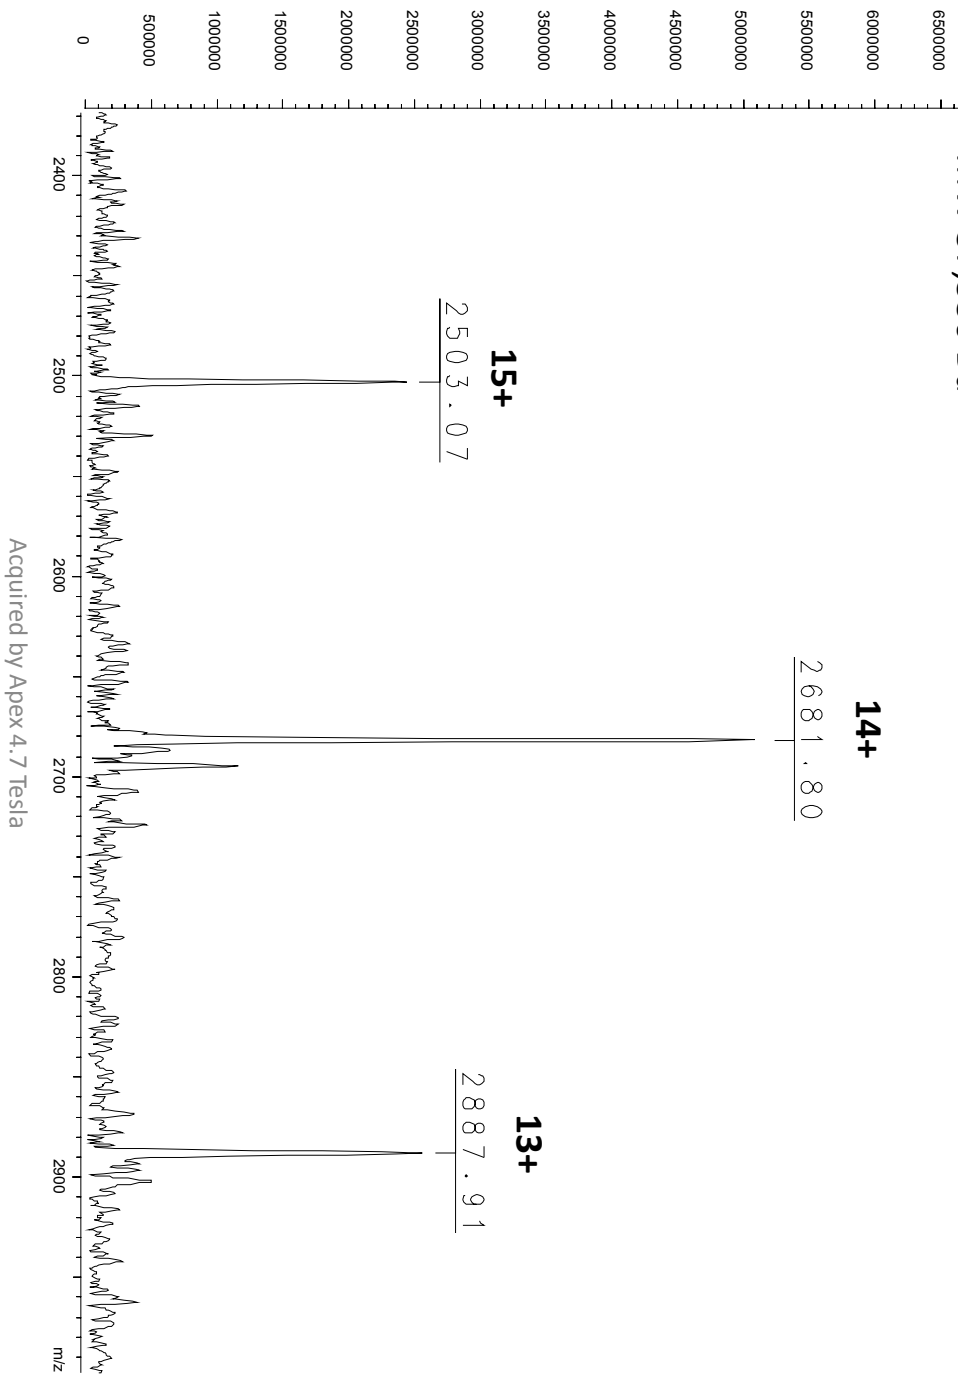

N-myristoyltransferase  
PF3D7\_1412800  
MW 49,935 Da

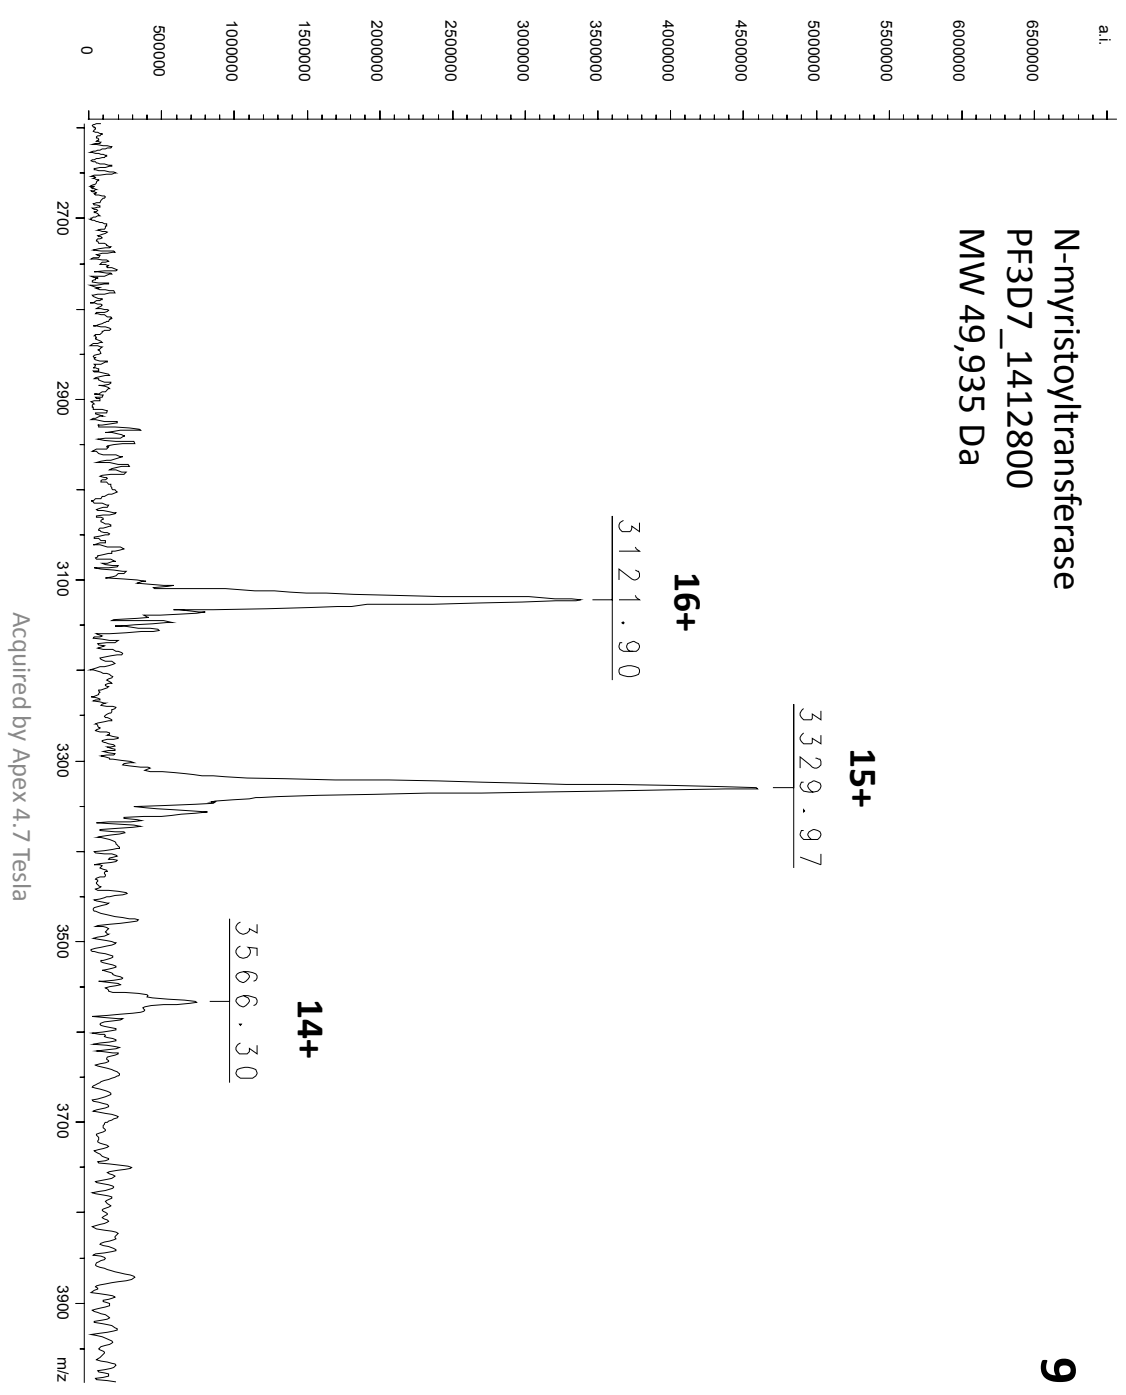

10

Ribosomal RNA methyltransferase  
PF3D7\_1309600  
MW 25,539 Da

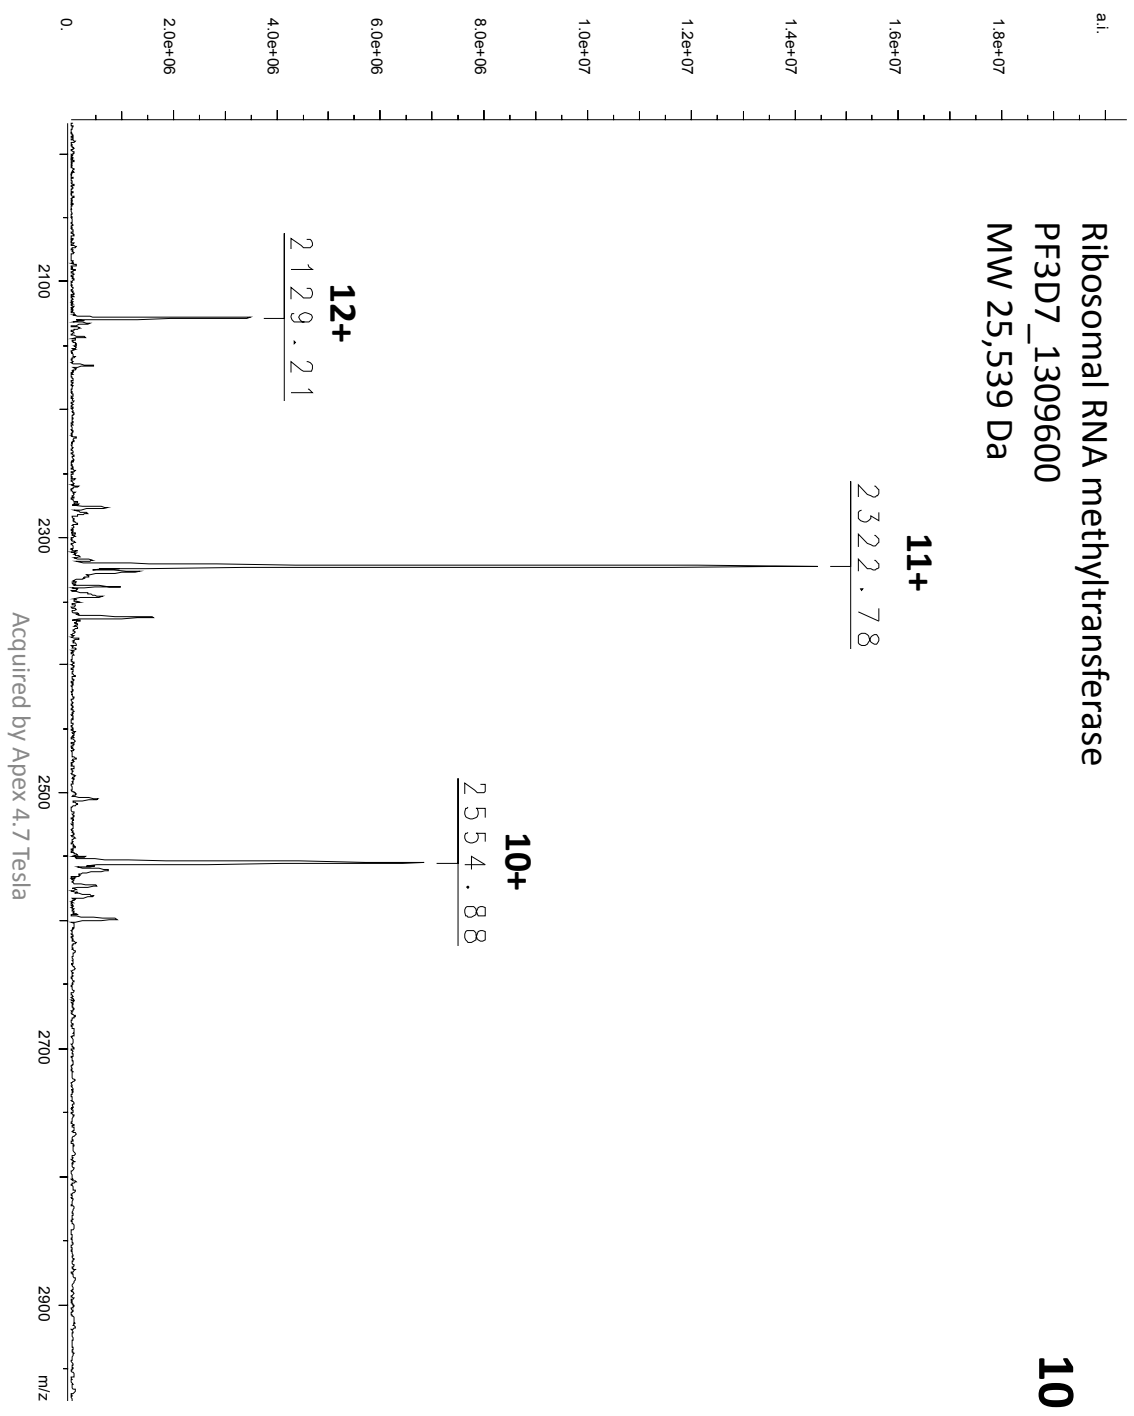

Phosphomethylpyrimidine kinase (PMPK)  
PF3D7\_0520500  
MW 35,861 Da

**11**

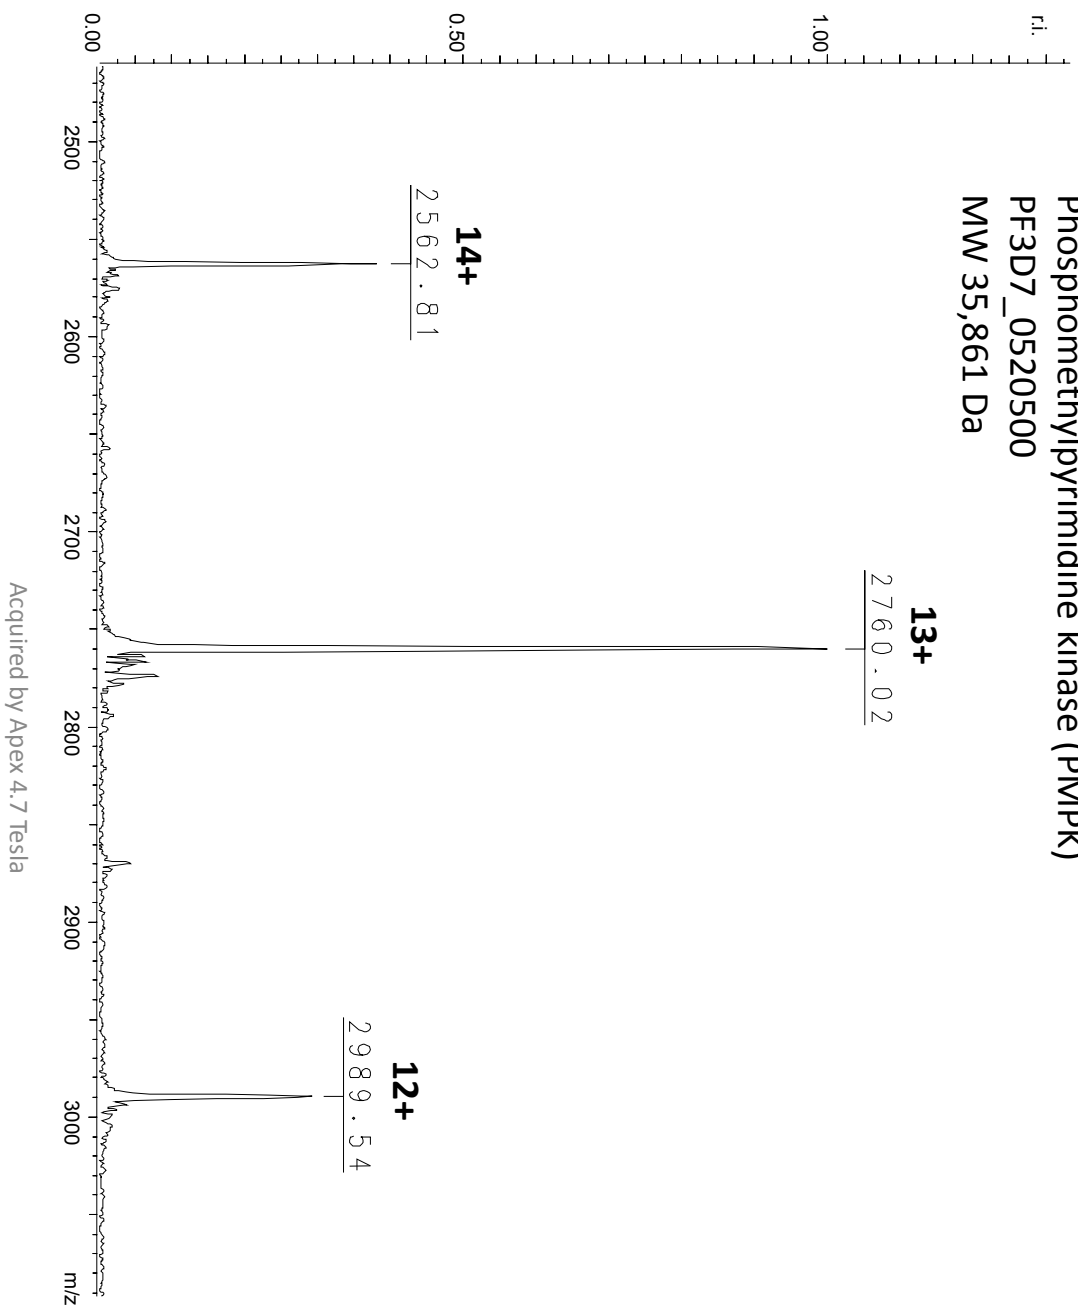



Guanylate kinase  
PWX\_099895  
MW 23,544 Da

**12**

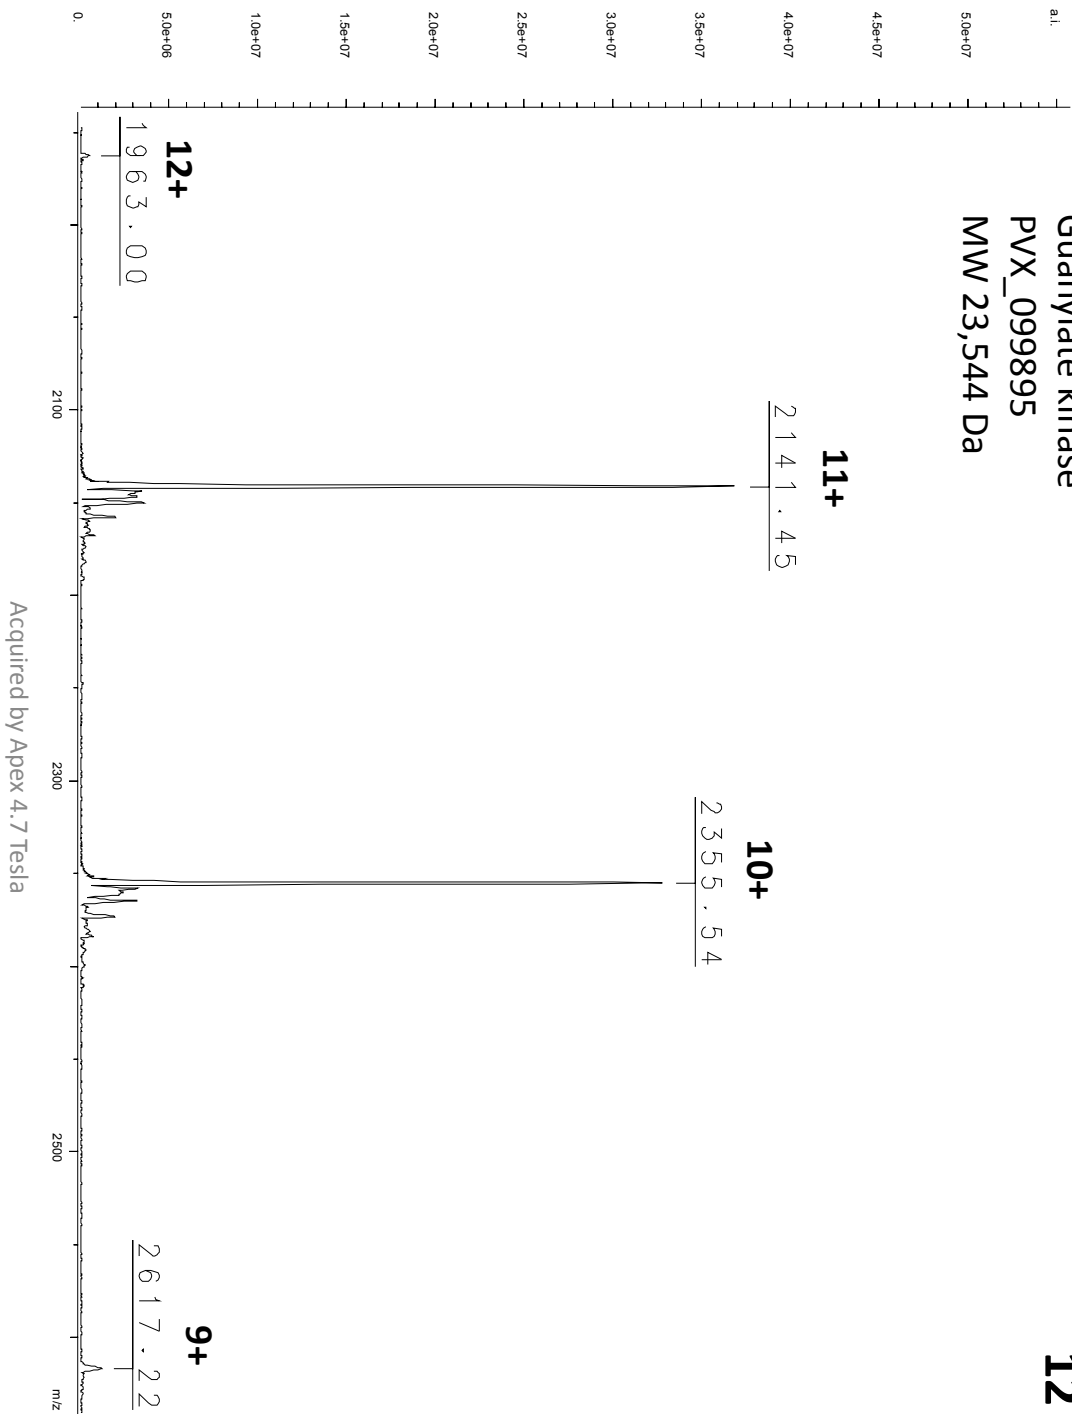

Spermidine synthase  
PF3D7\_1129000  
MW 34,421 Da

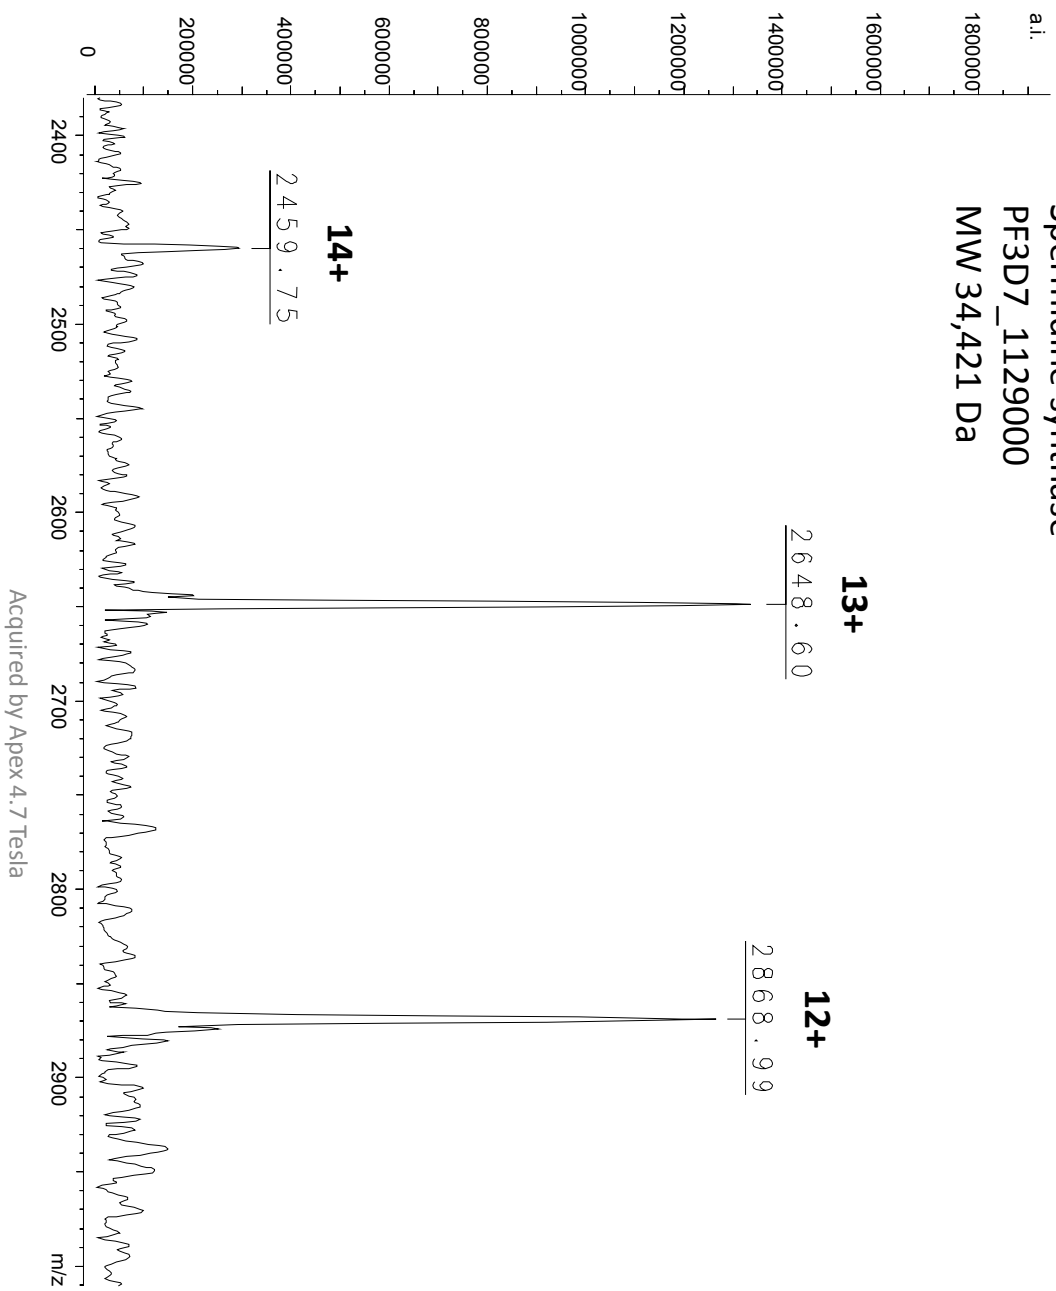

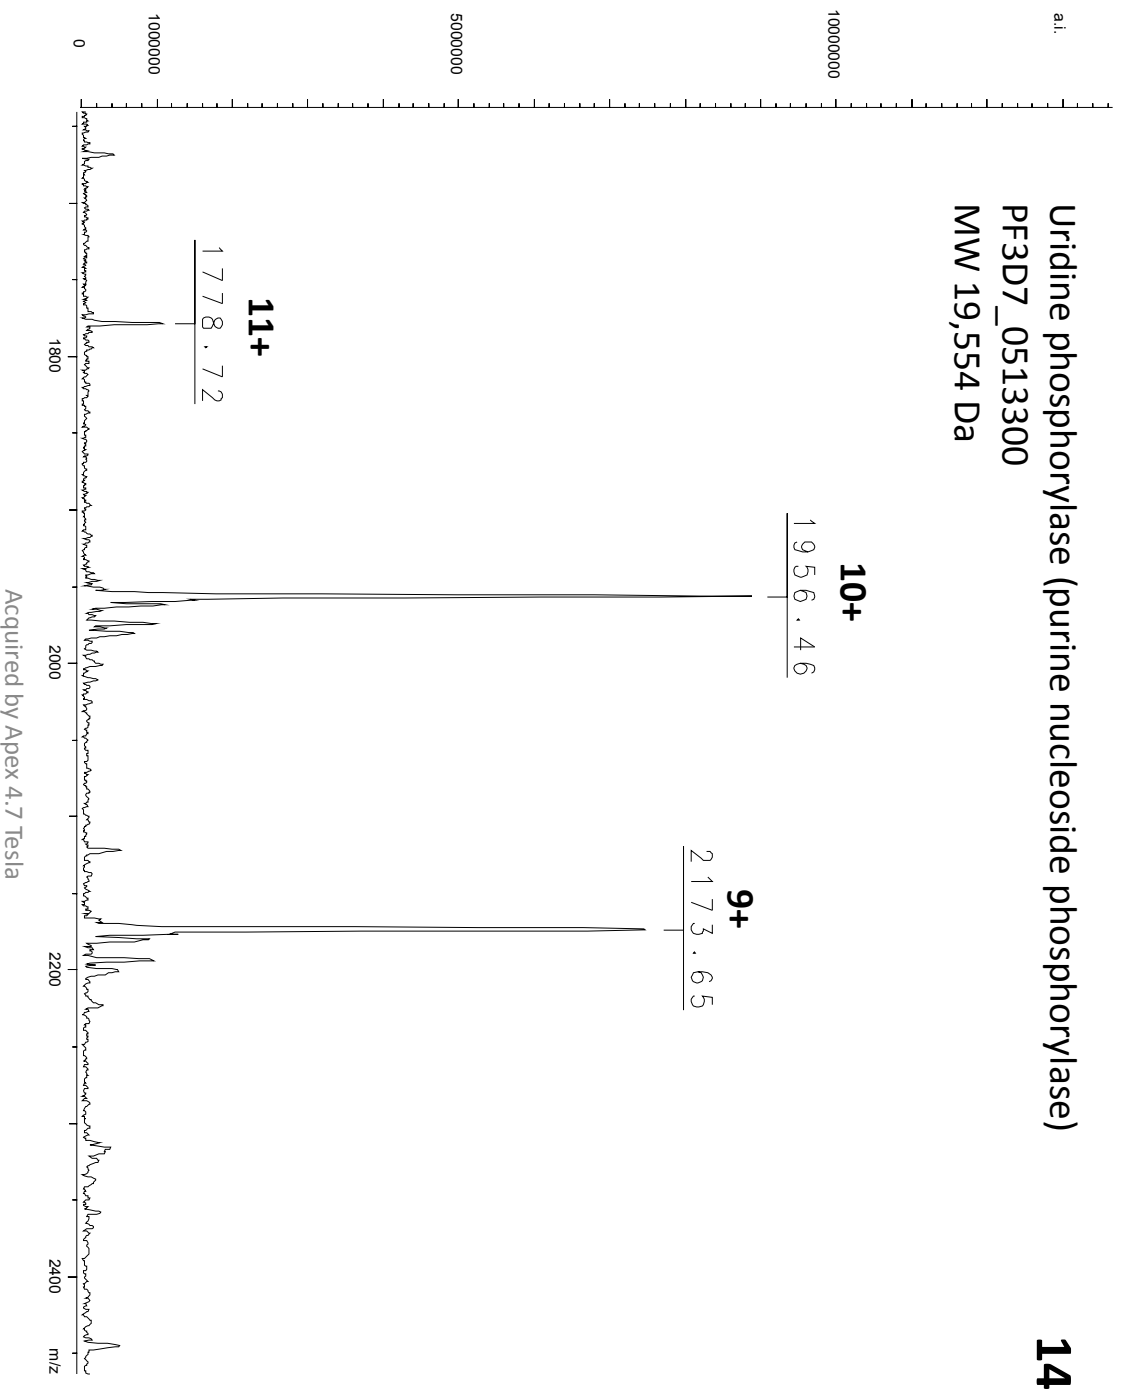

a.i.  
CDK-related protein kinase 6 (PK6)  
PF3D7\_1337100  
MW 37,995 Da

**15**

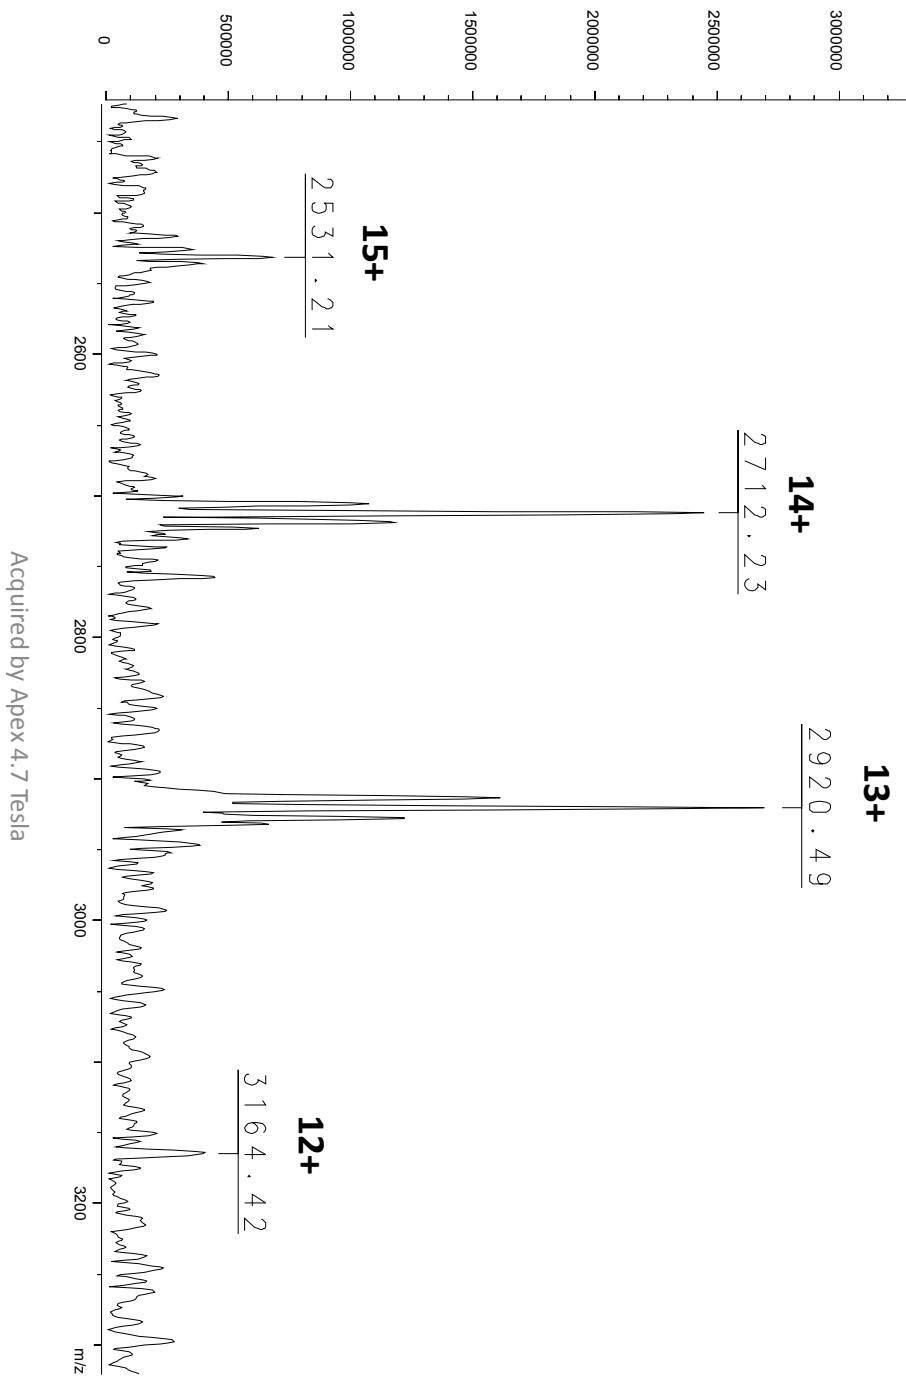

Phosphoglycerate kinase (PGK)  
PF3D7\_0922500  
MW 46,325 Da

**16**

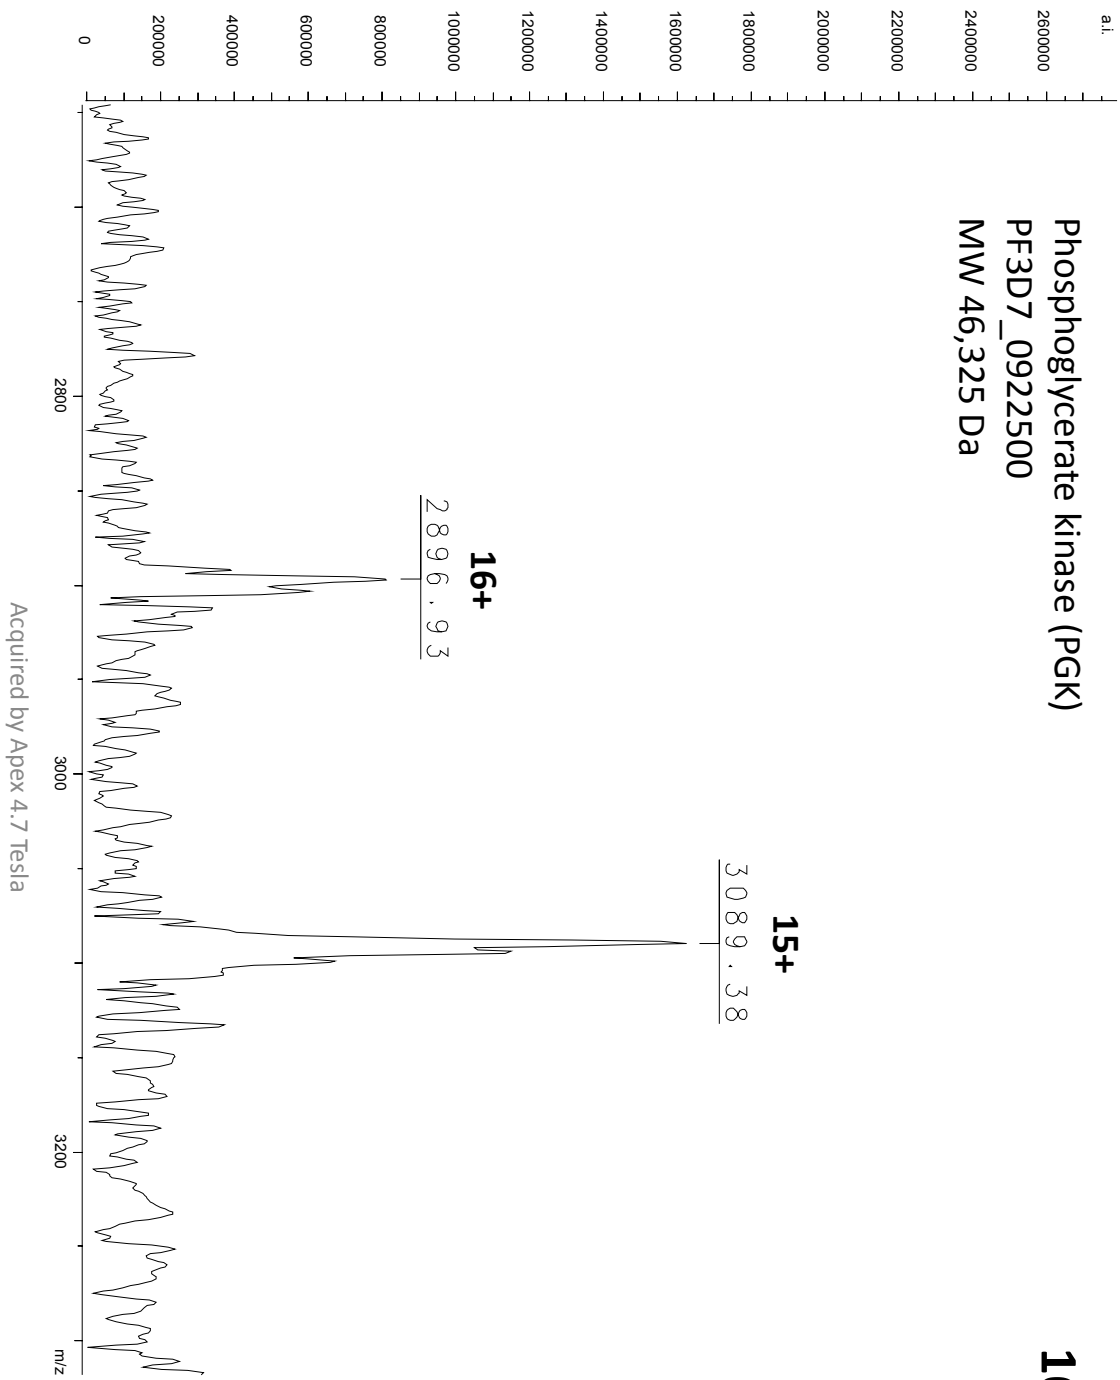

a.i.  
Aspartate carbamoyltransferase  
PVX\_083135  
MW 47,102 Da

**17**

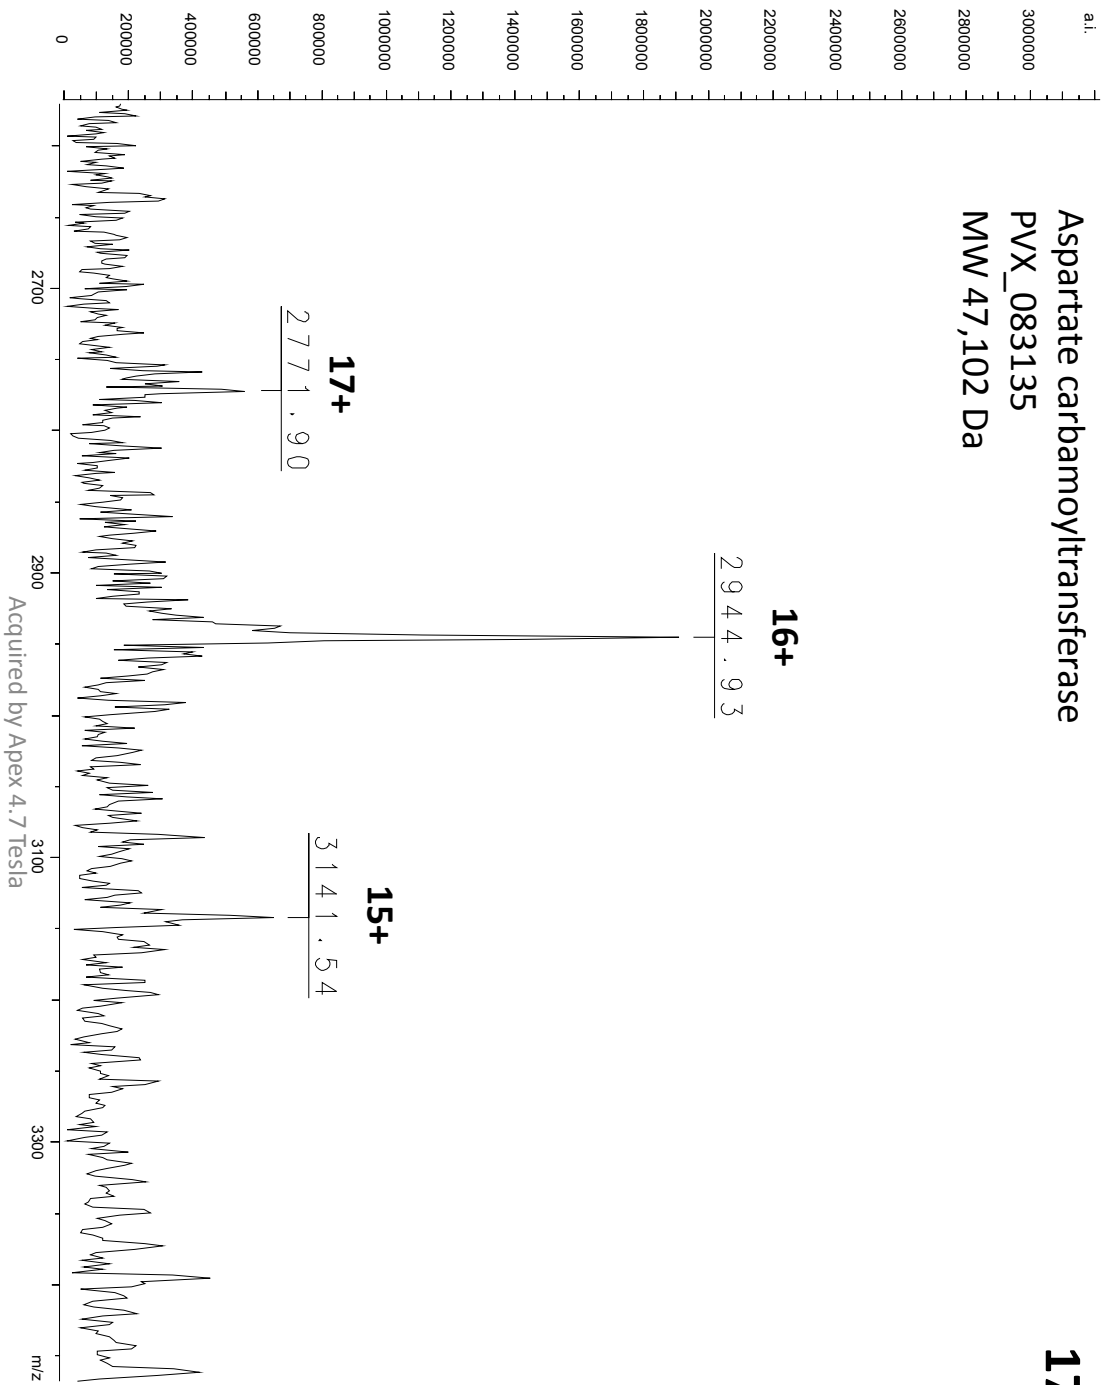

Rab18GTPase  
PF3D7\_0807300  
MW 21,757 Da/43,514 Da

18

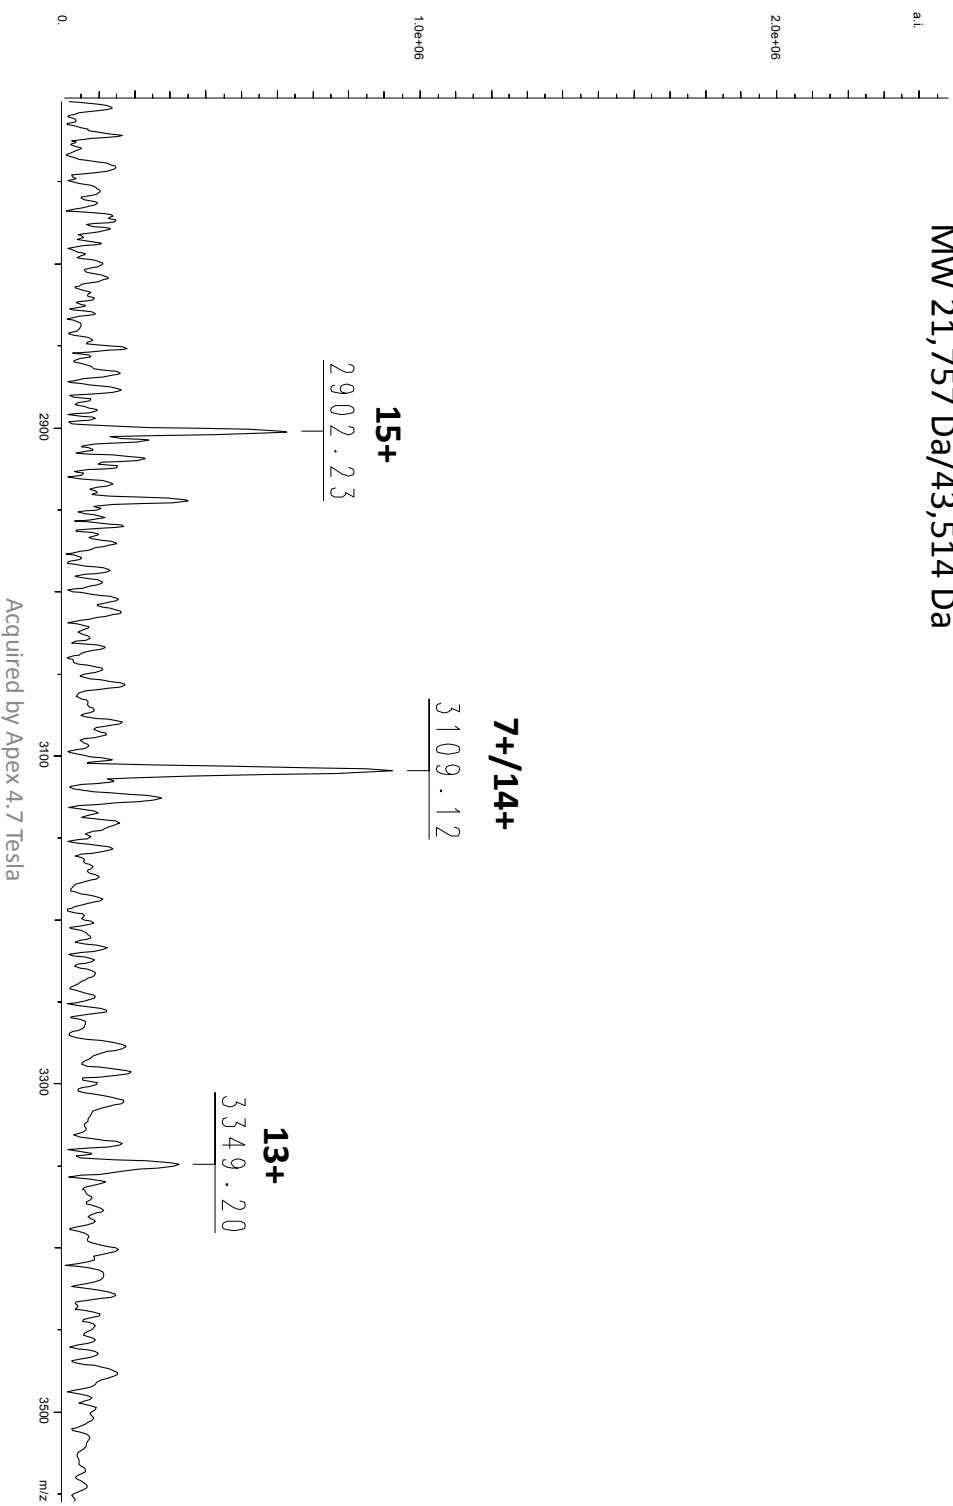

Adenosine deaminase (ADA)  
PVX\_111245  
MW 42,816 Da

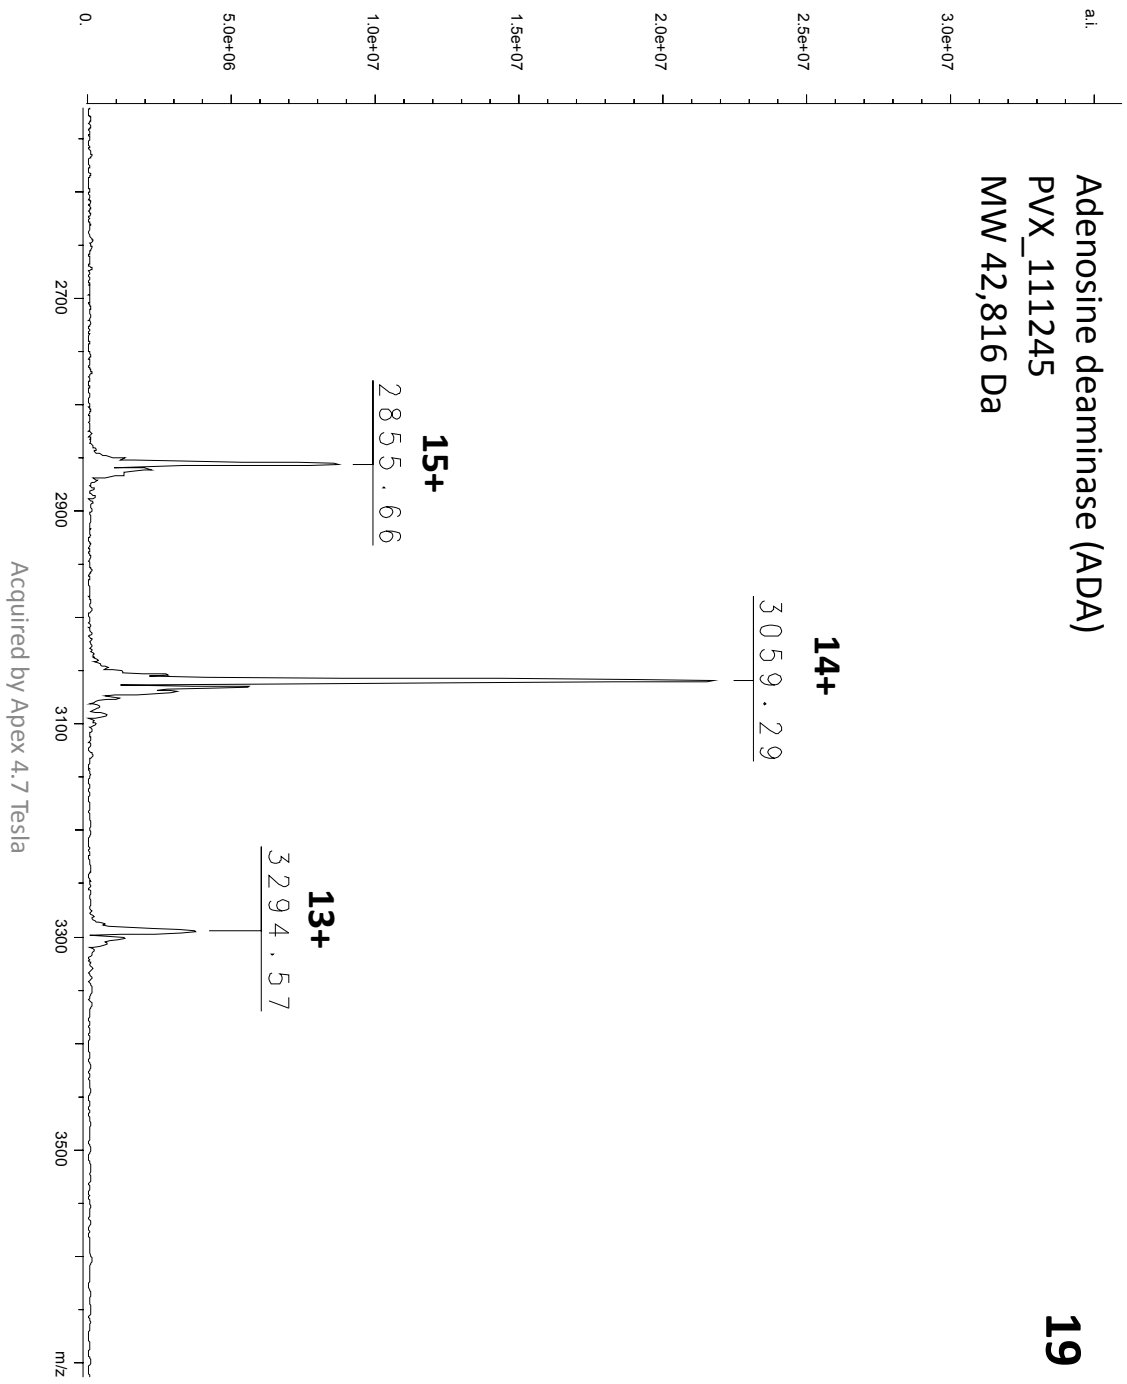



dUTPase  
PF3D7\_1127100  
MW 20,340Da

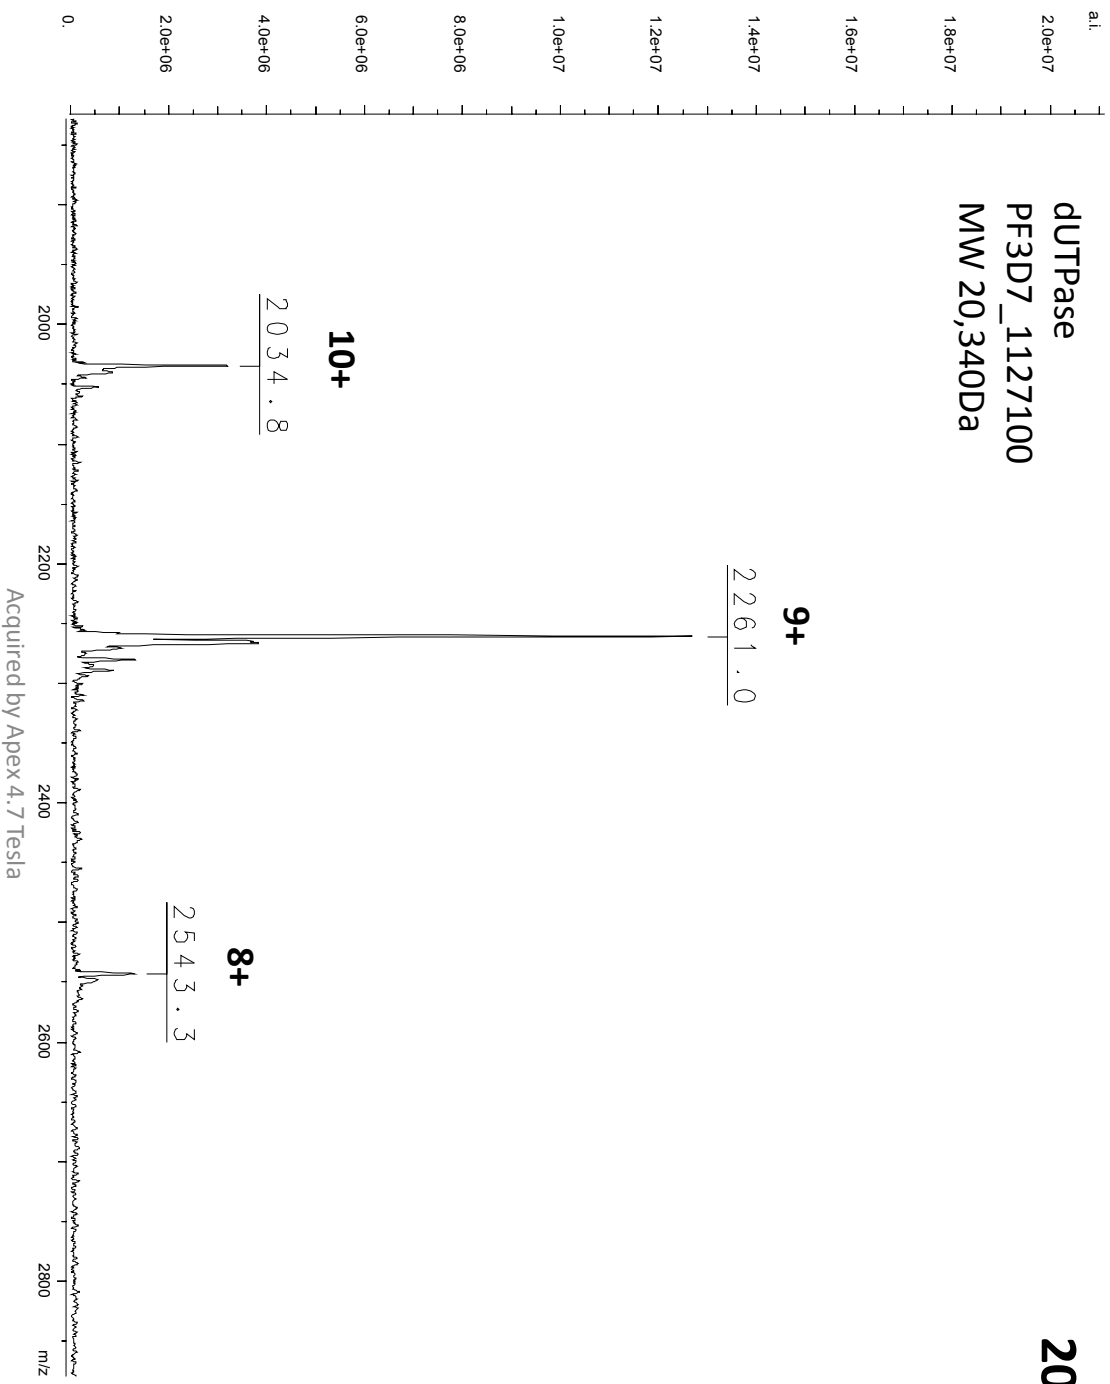

6-Phosphogluconolactonase  
PF3D7\_1453800  
MW 41,005 Da

21

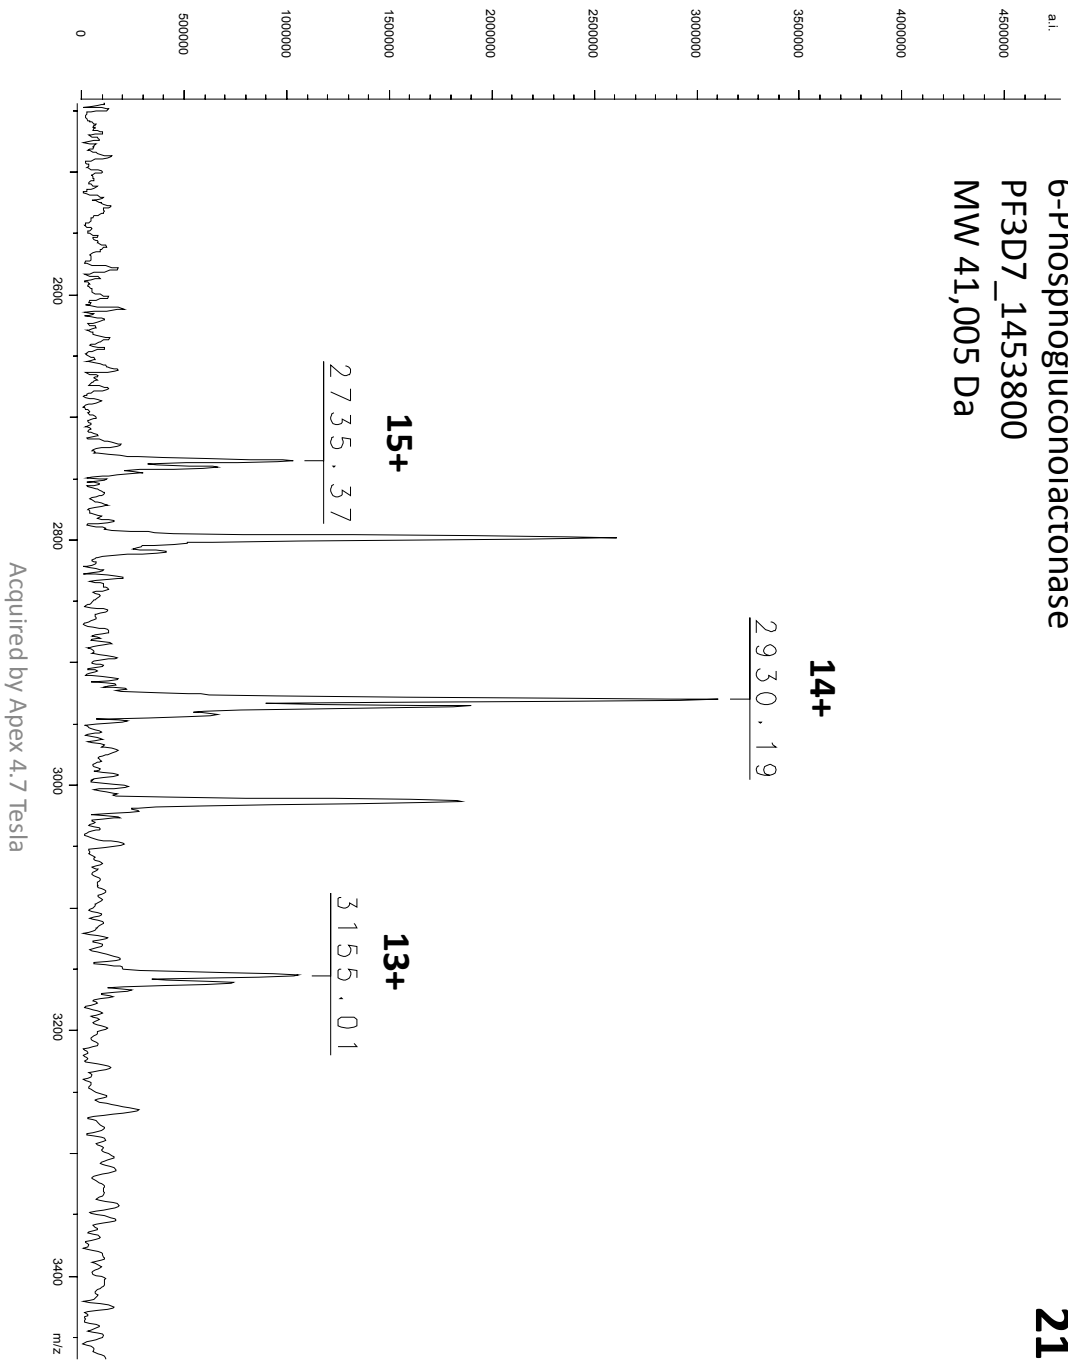

Rab 11a GTPase  
PF3D7\_1320600  
MW 23,241 Da

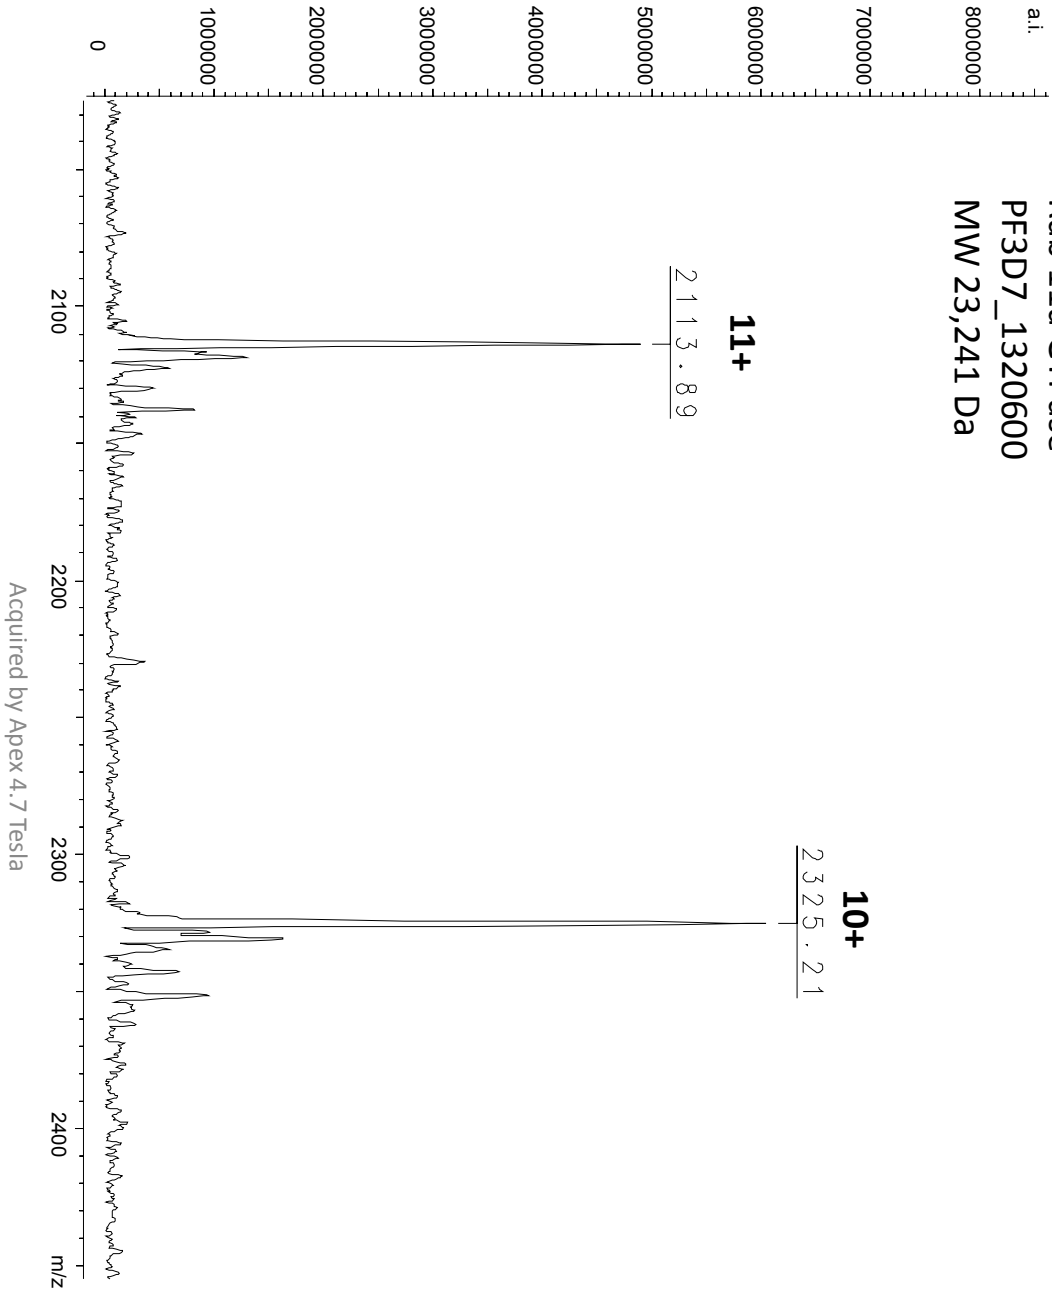

Ubiquitin carboxyl-terminal hydrolase isozyme L3 (UCHL3)  
PF3D7\_1460400  
MW 27790 Da

**23**

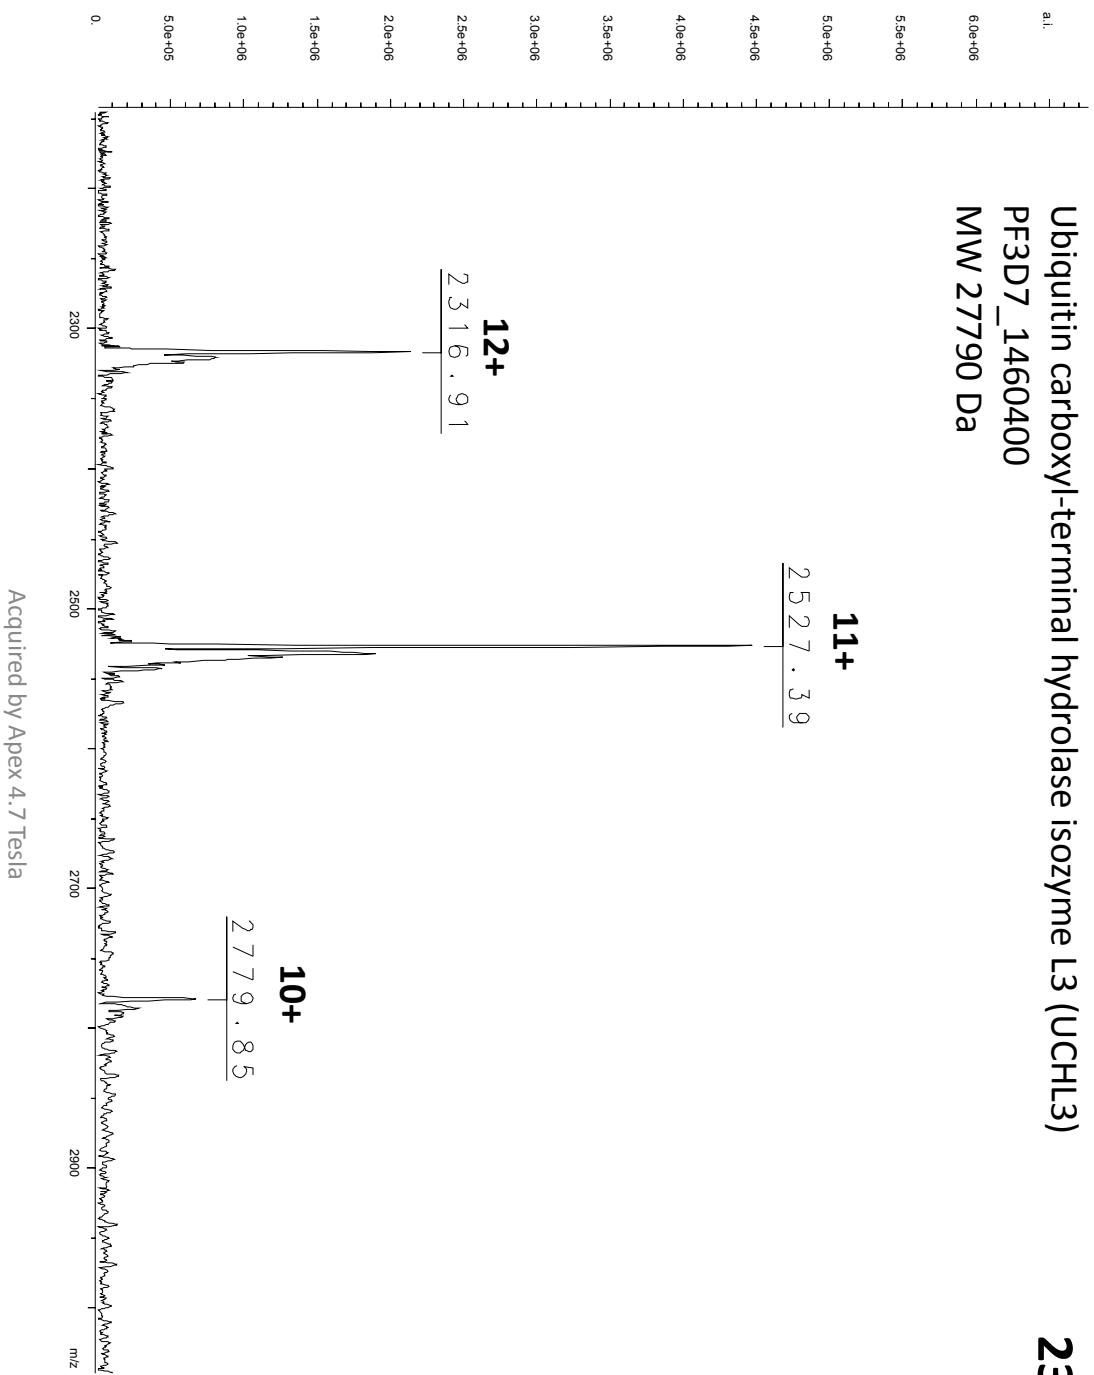

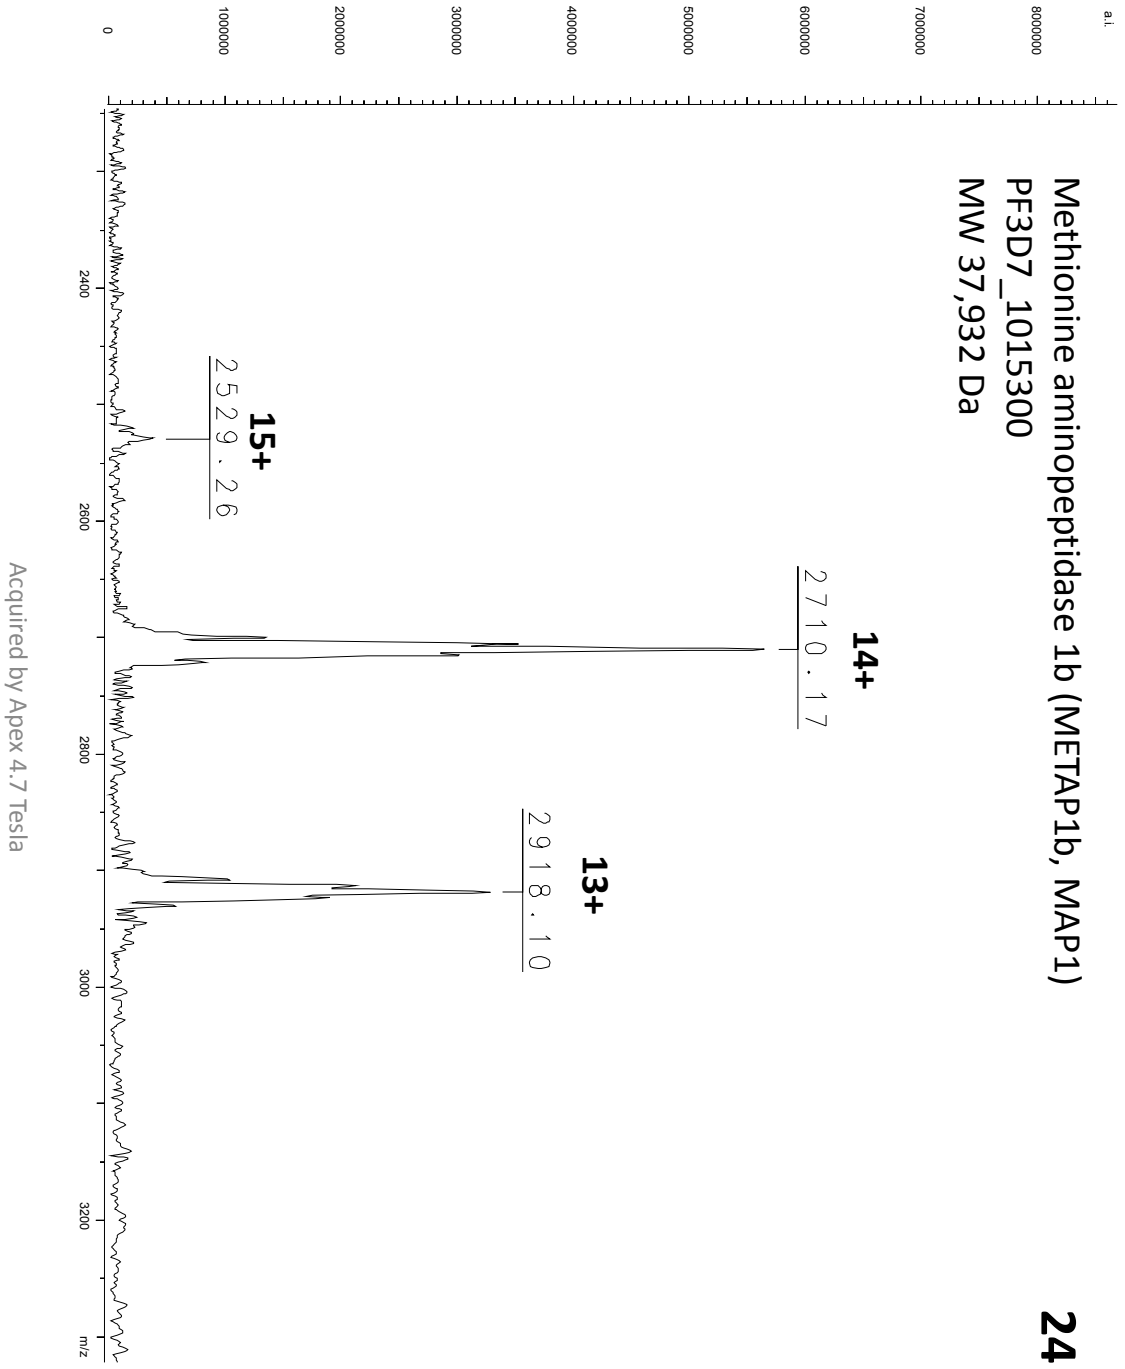

a1.

S-adenosylhomocysteine hydrolase (SAHH)  
PF3D7\_0520900  
MW 54,733 Da

**25**

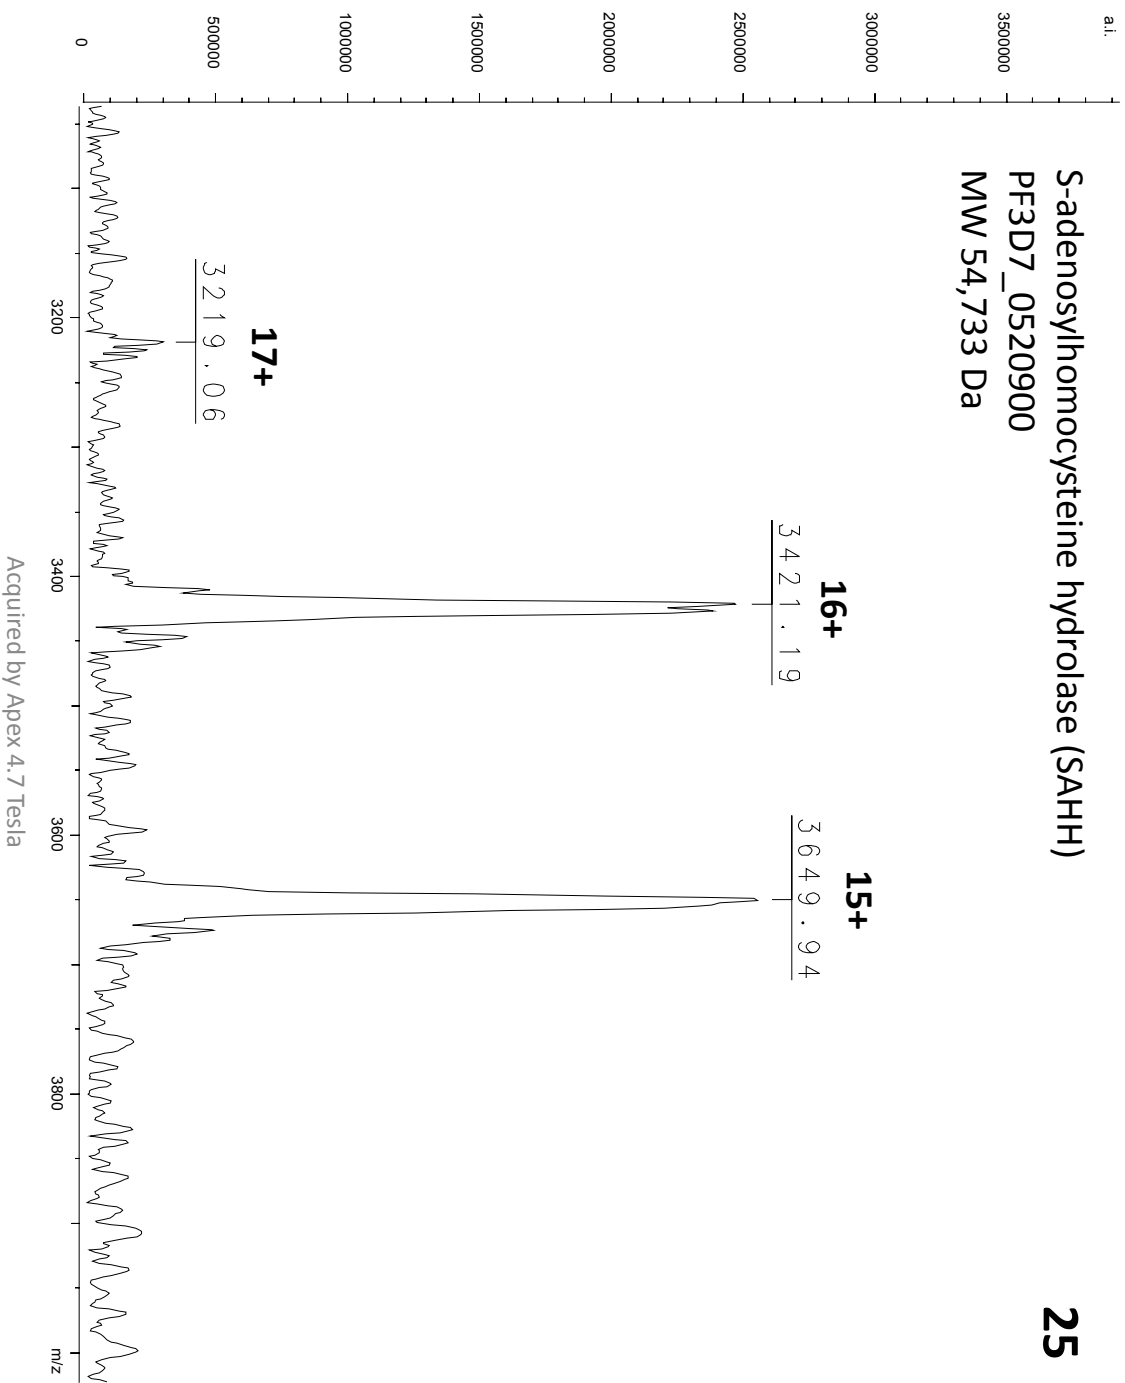

ATP-dependent DNA helicase Q1 (RECQ1)  
PF3D7\_0918600  
MW 12,576 Da

26

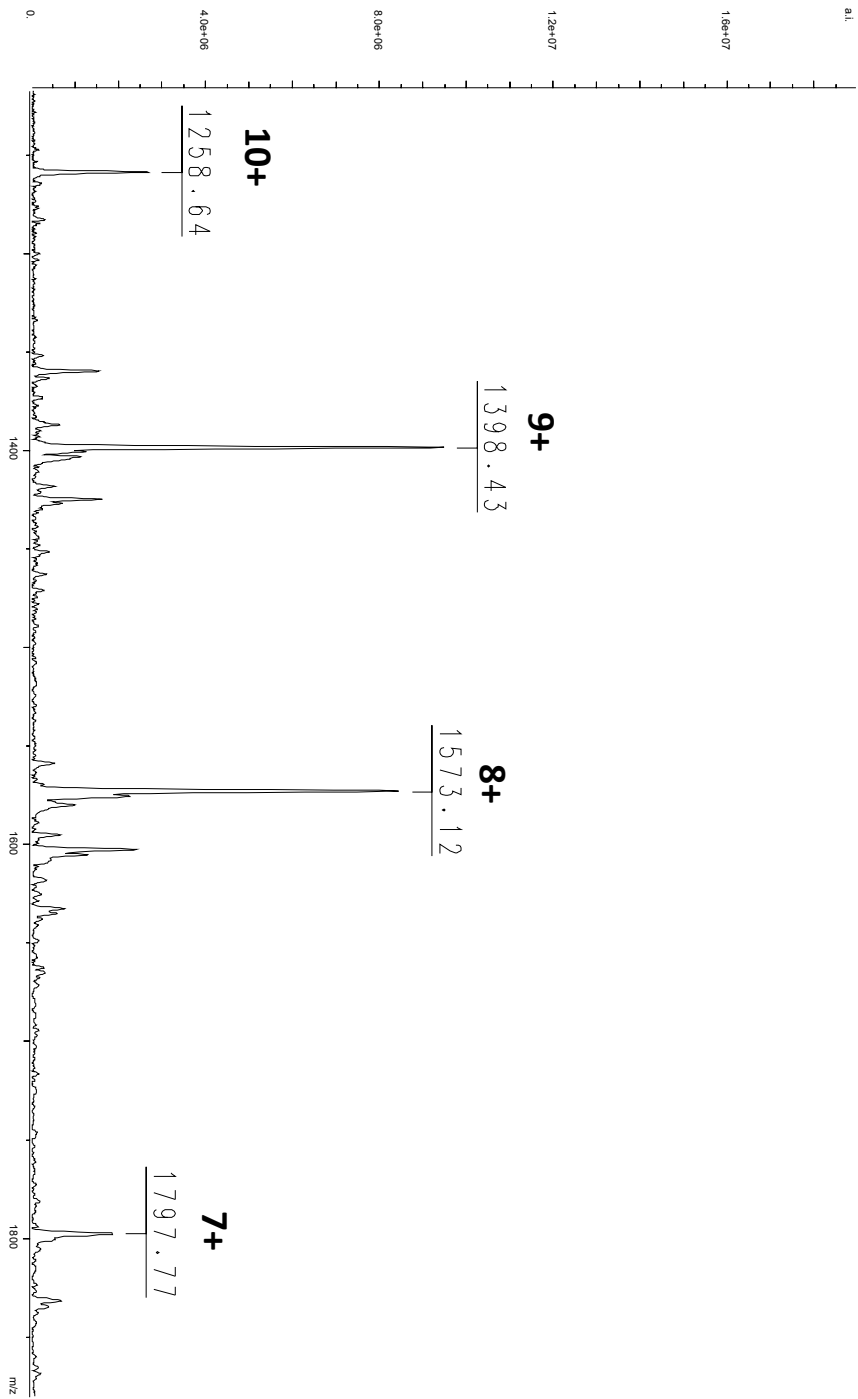

27

Adenosine deaminase (ADA)  
PF3D7\_1029600  
MW 44,666 Da

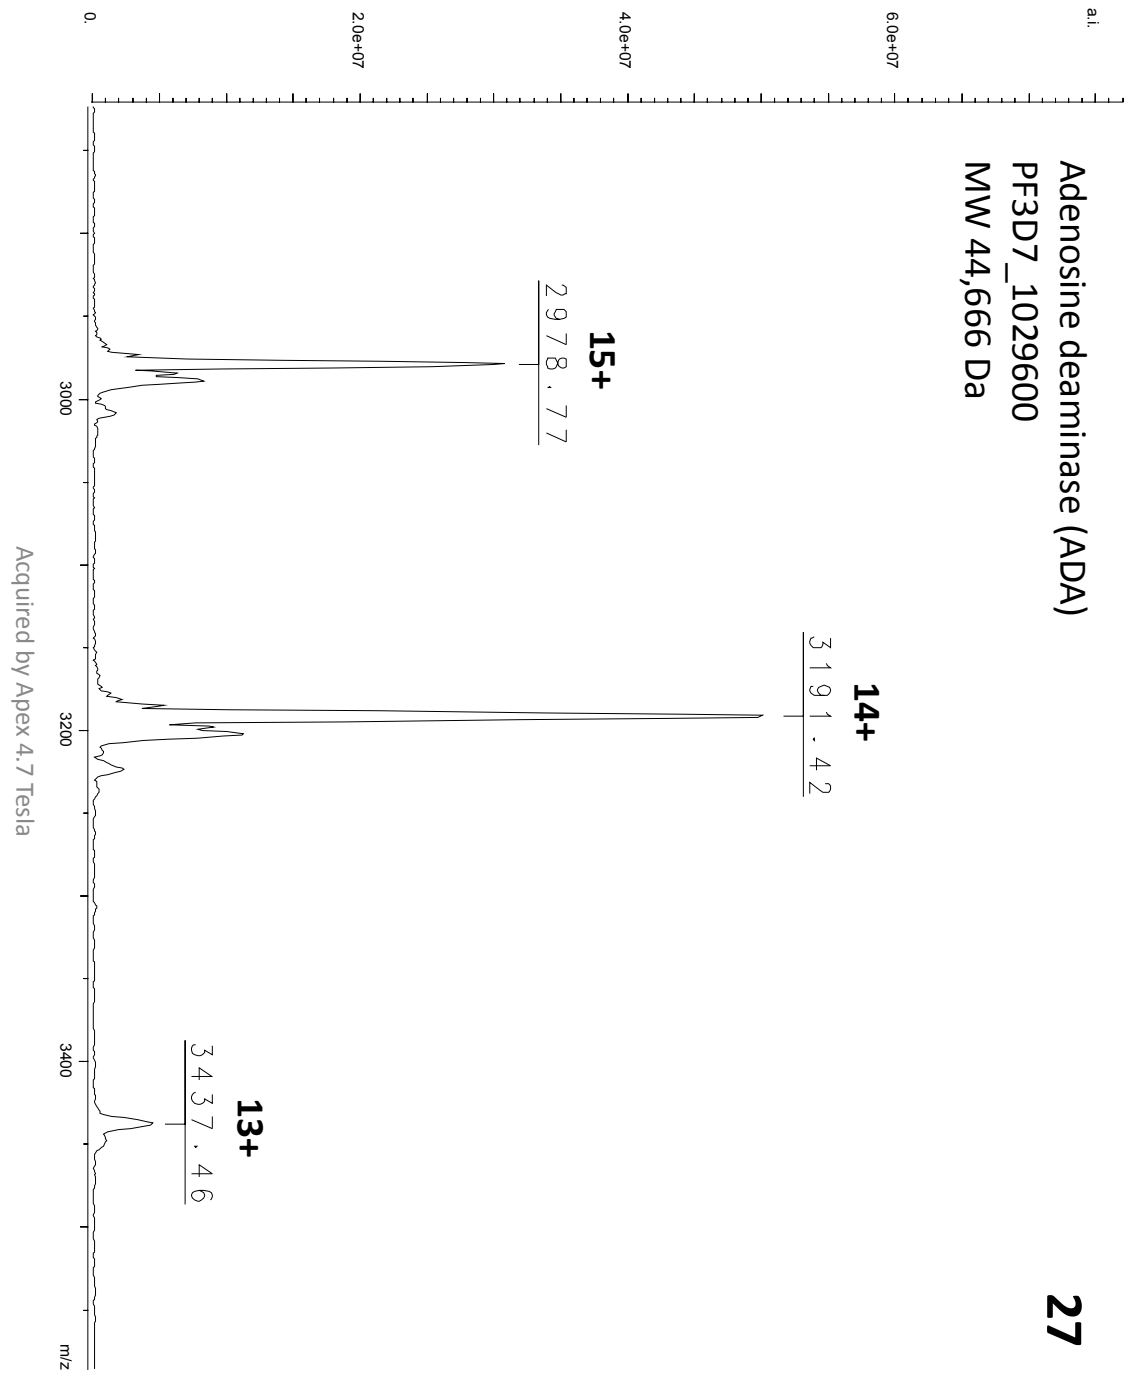



ATP-dependent Clp protease proteolytic subunit (ClpP)  
PF3D7\_0307400  
23,552 Da

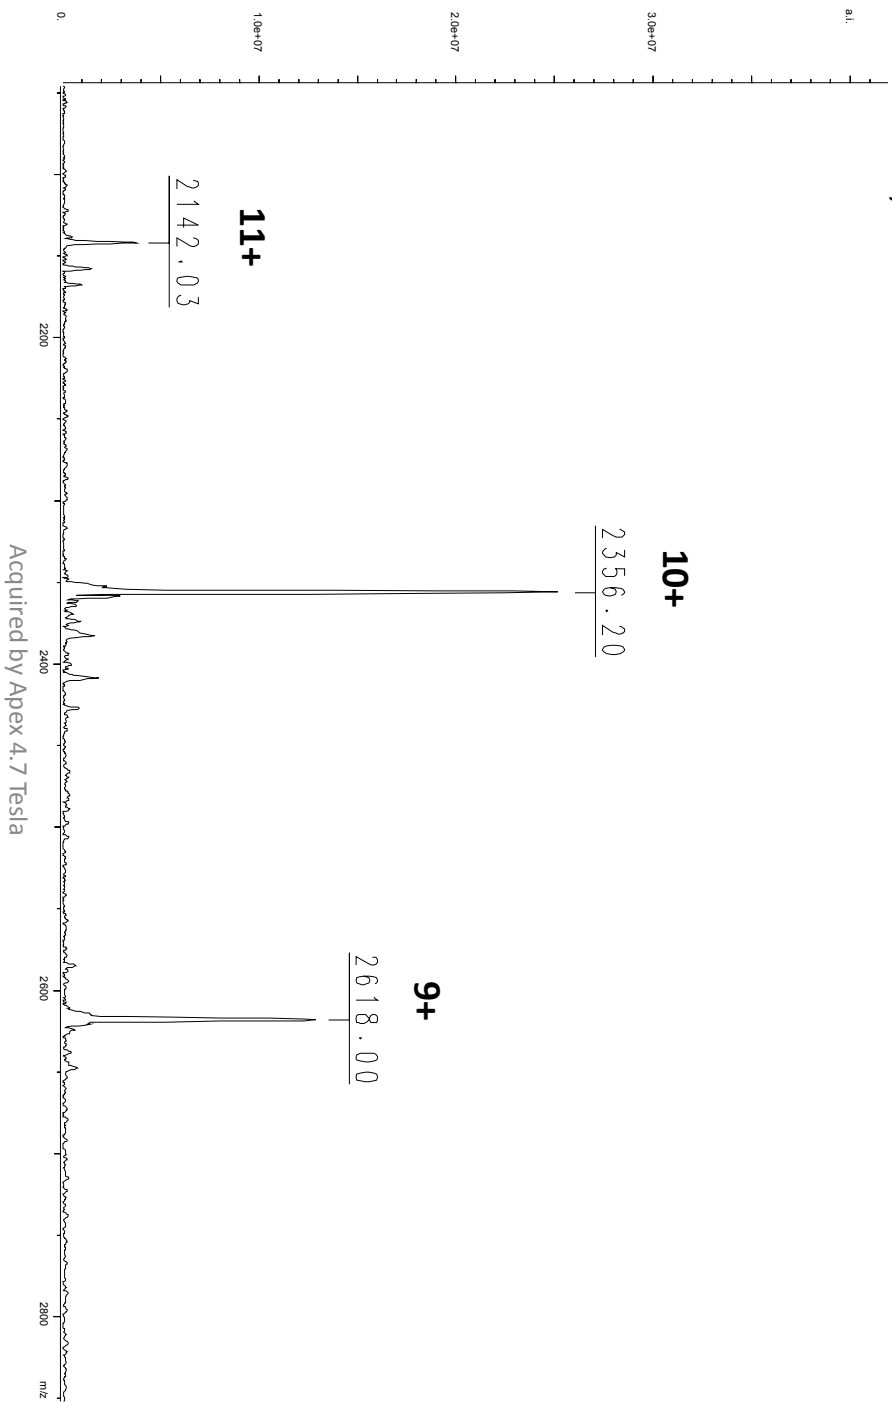

29

Glyoxalase I  
PF3D7\_1113700  
MW 23,775 Da

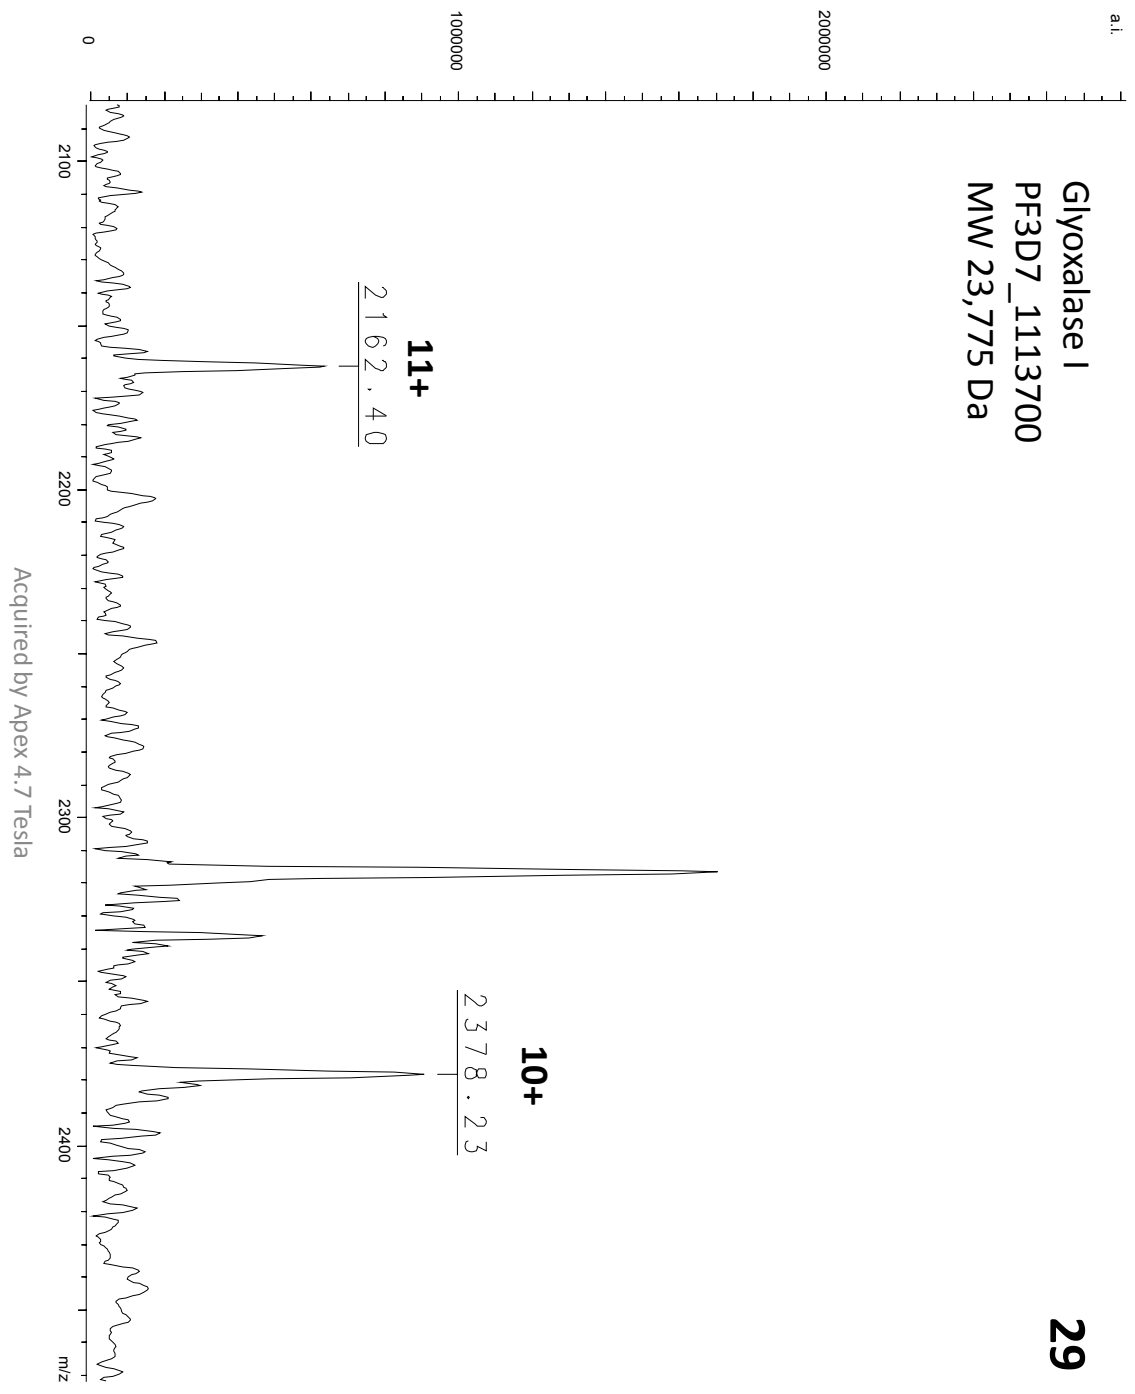

a1.

Adenylosuccinate lyase  
PVX\_003765  
MW 47,094 Da

30

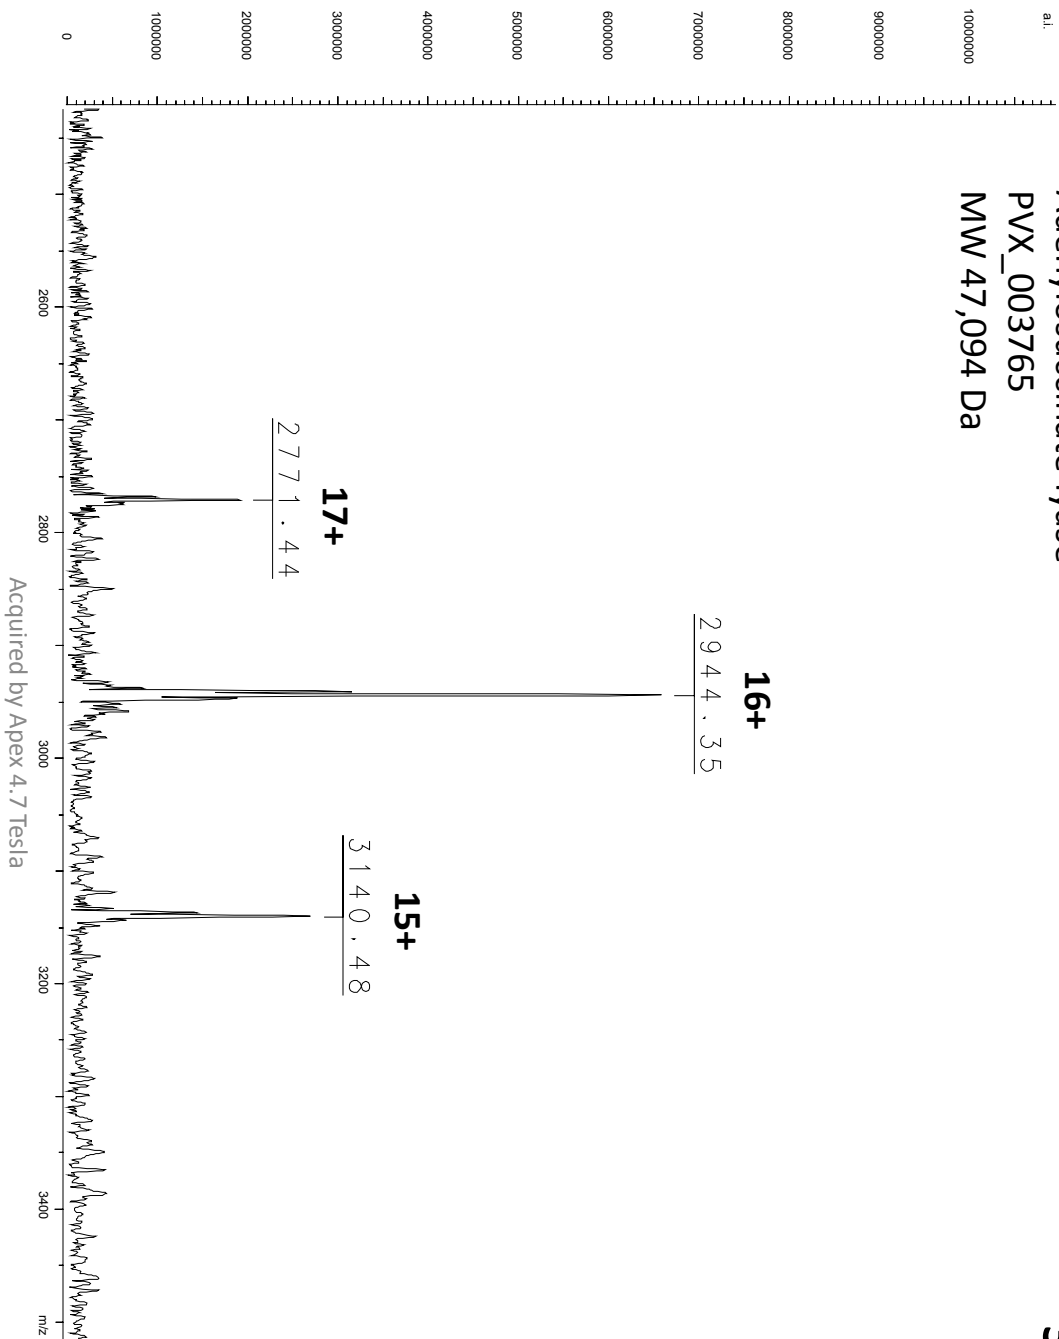

a.i.  
Deoxyribose-phosphate aldolase  
PY02252  
MW 31,101 Da/62,201 Da

**31**

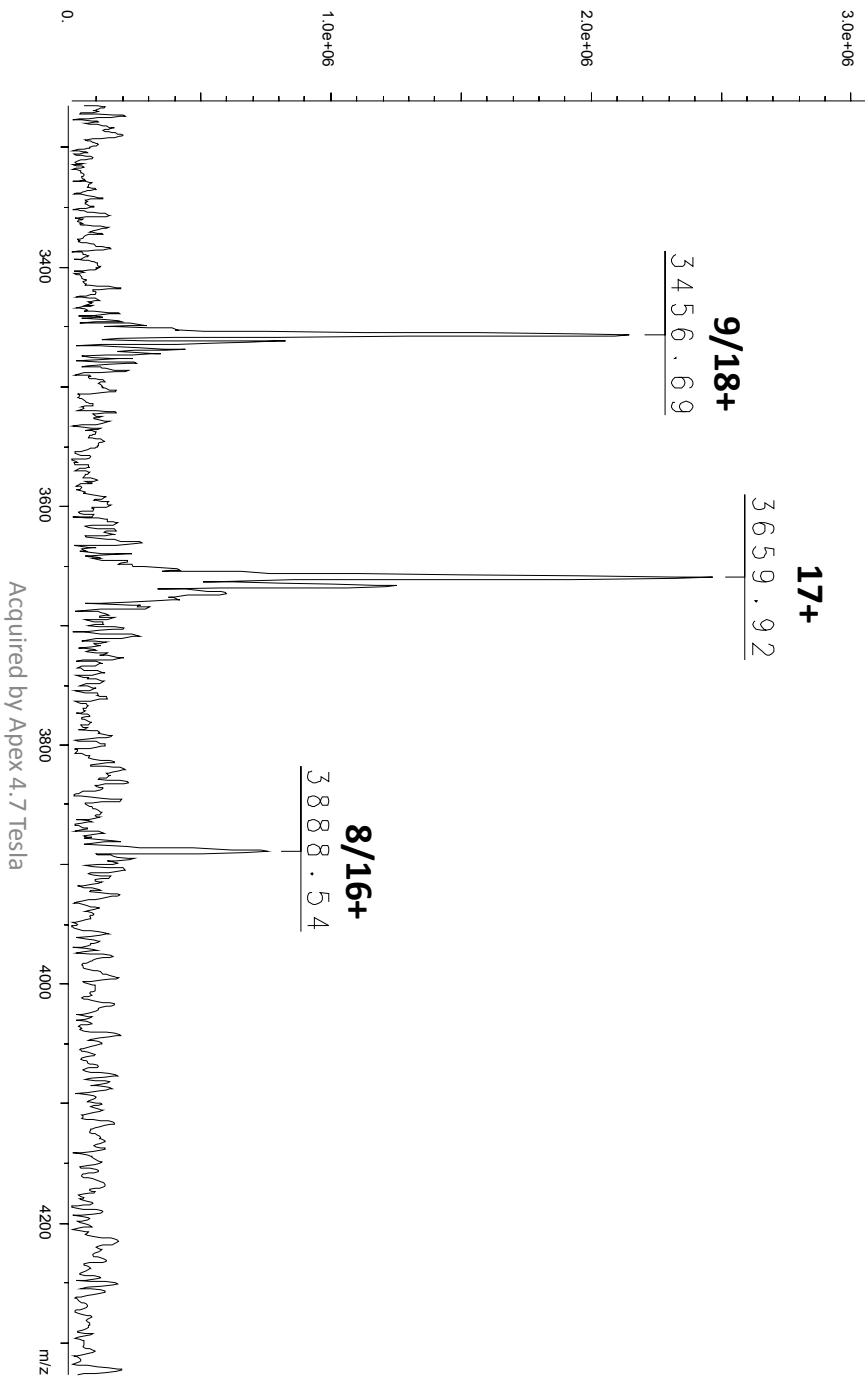

Orotidine 5' monophosphate decarboxylase (OMPDC) **32**  
PF3D7\_1023200  
MW 38,768 Da/77,536 Da

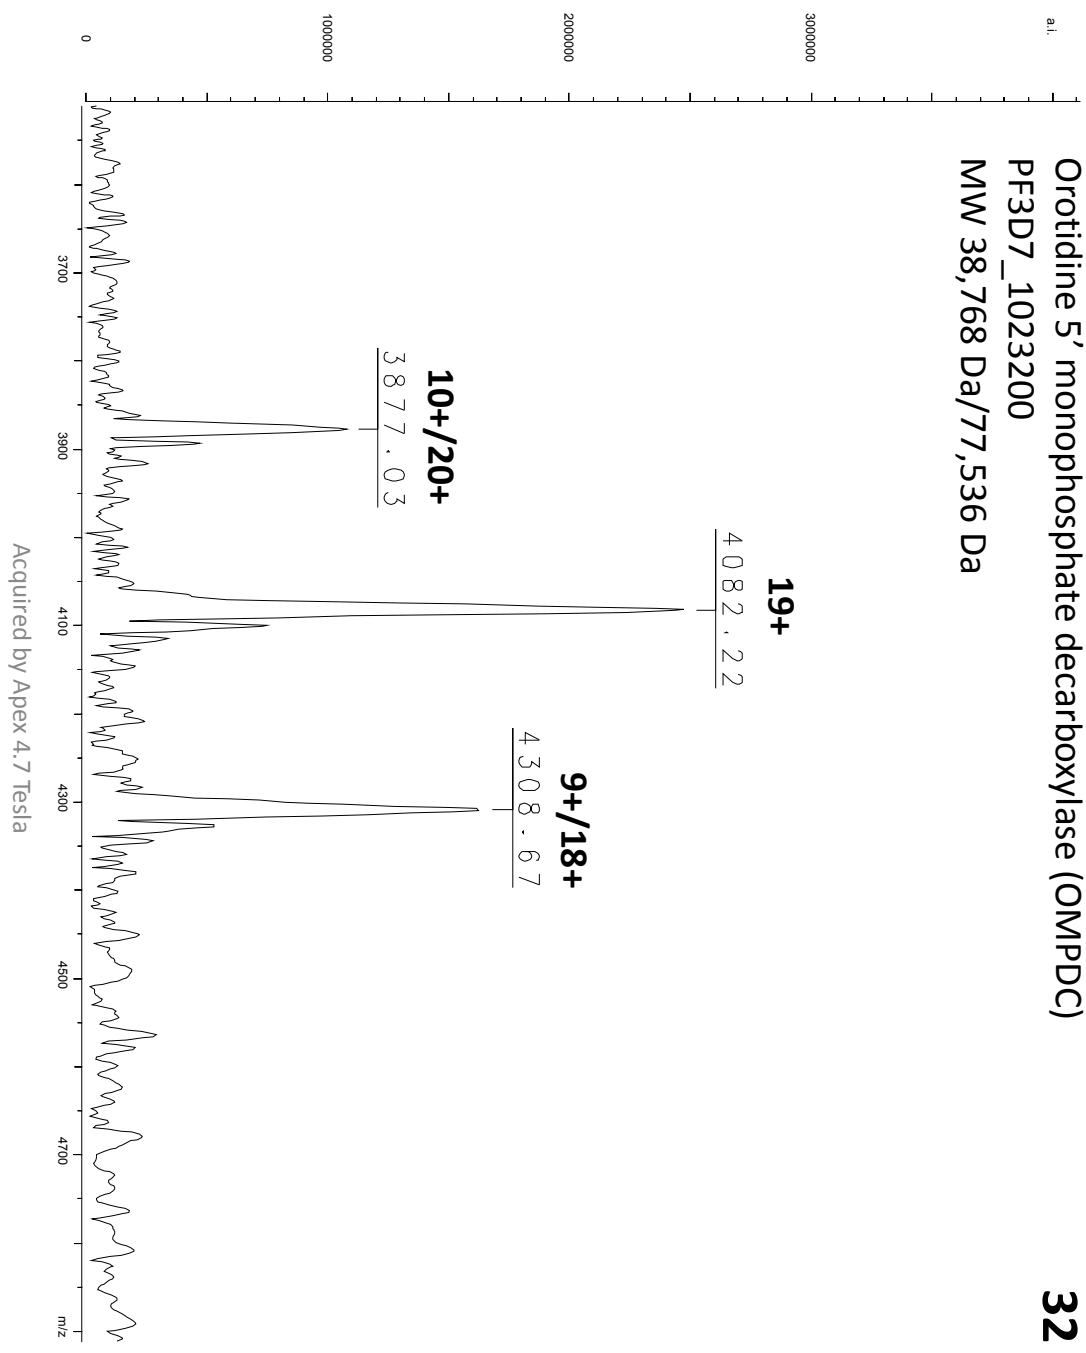

6-pyruvoyltetrahydropterin synthase

PF3D7\_0628000

MW 20,953 Da

**33**

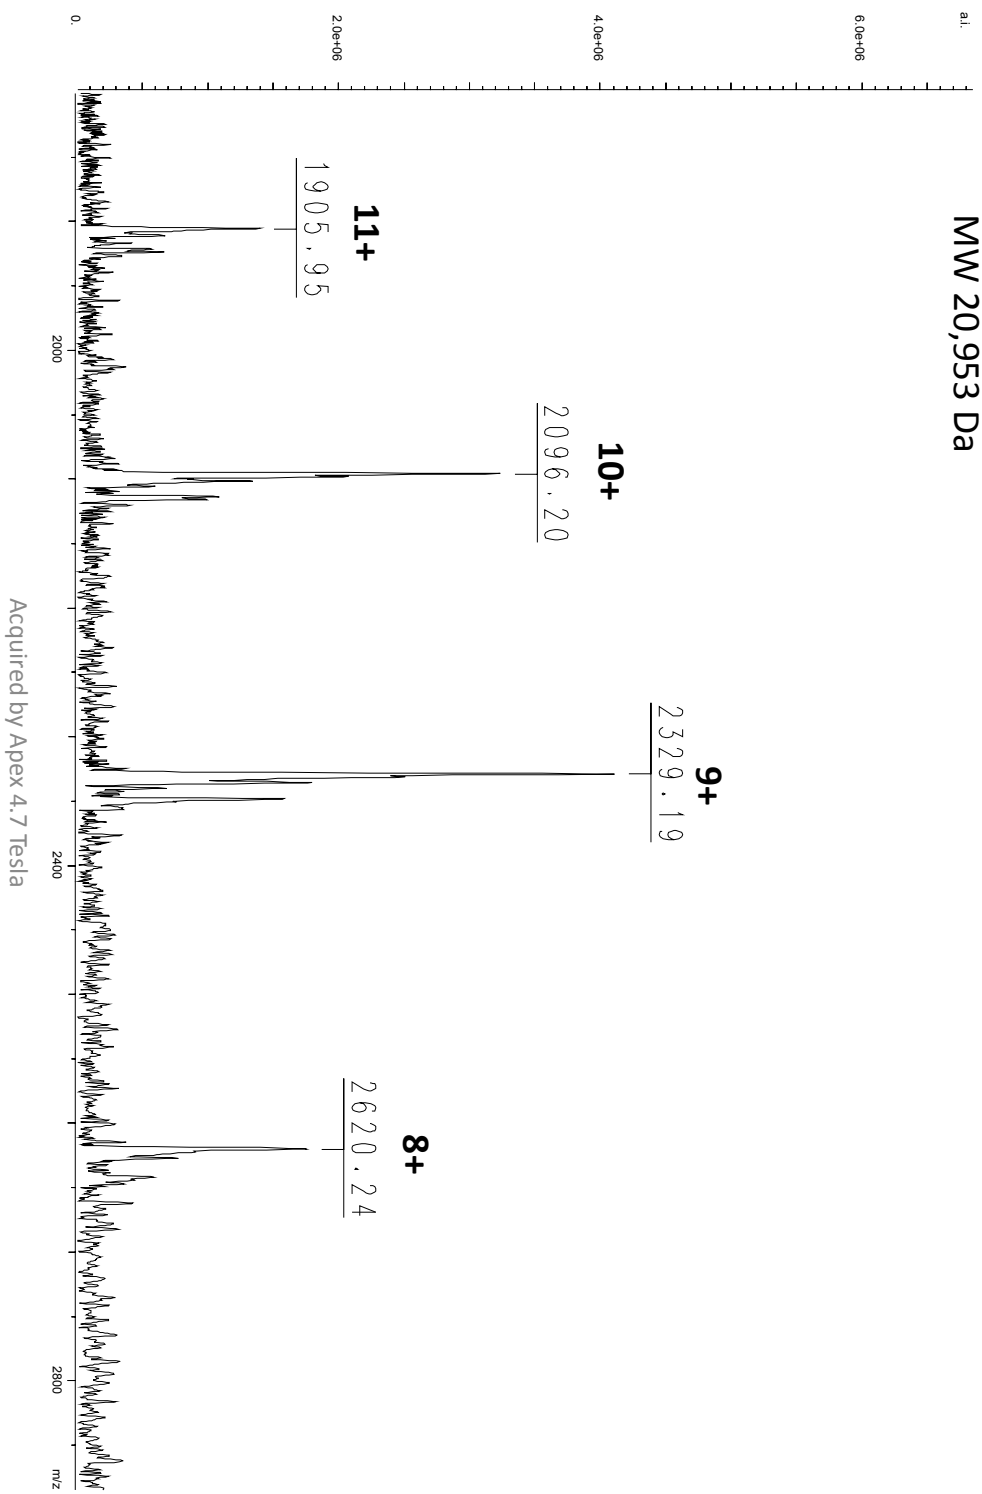

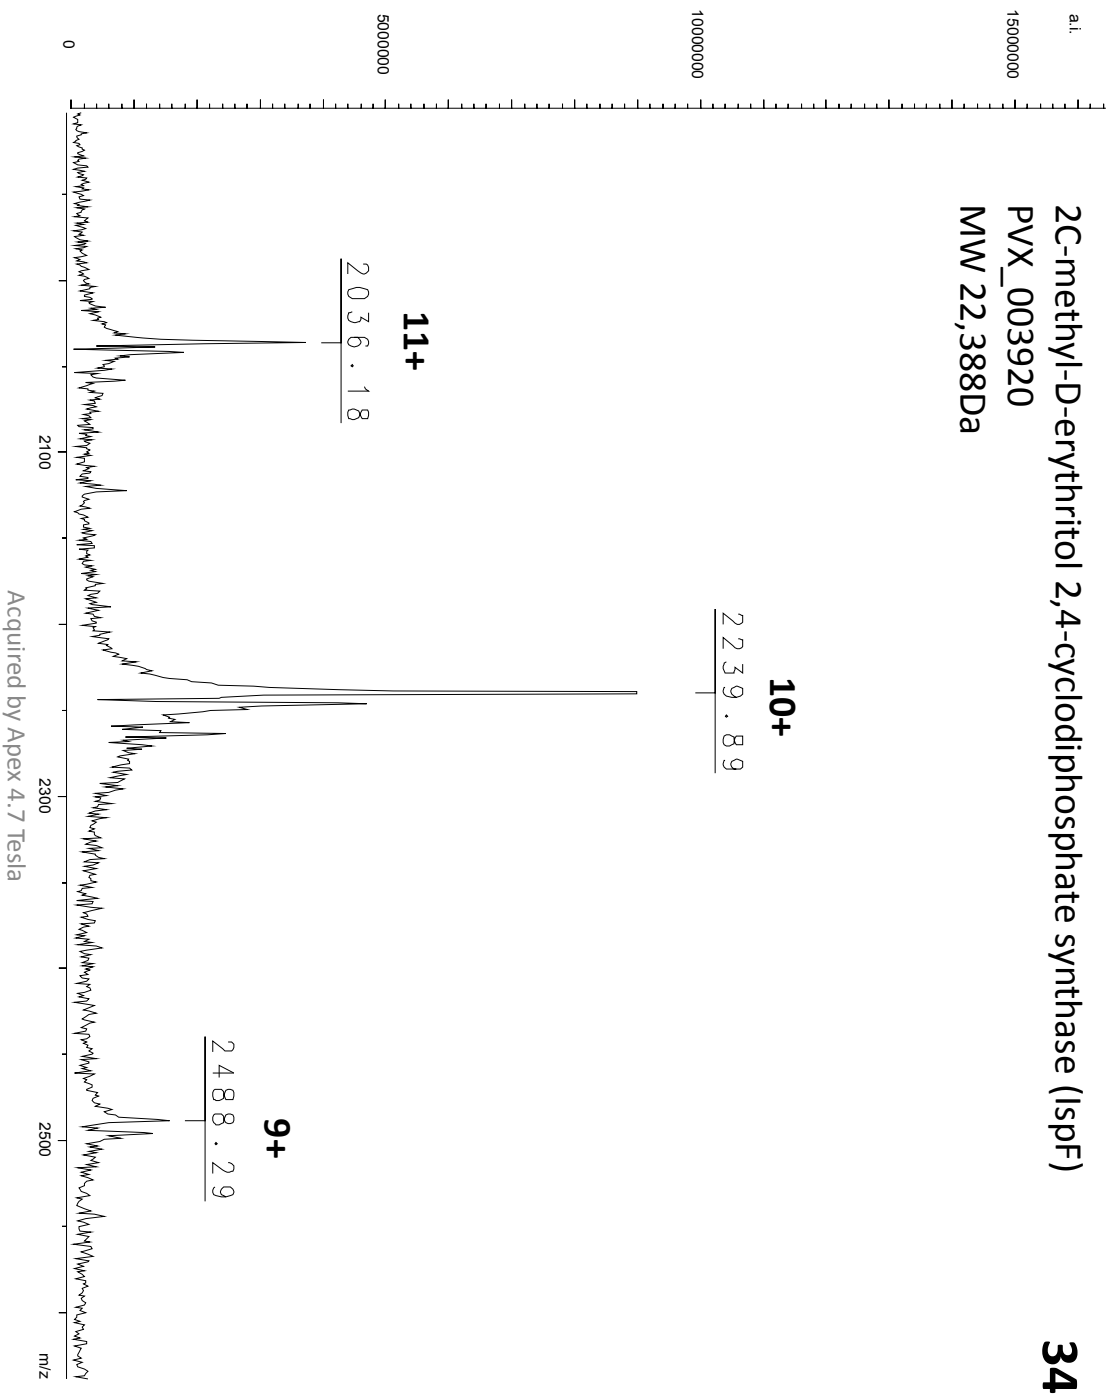

a.1.  
Phosphoglycerate mutase  
PF3D7\_1120100  
MW 29,662 Da

35

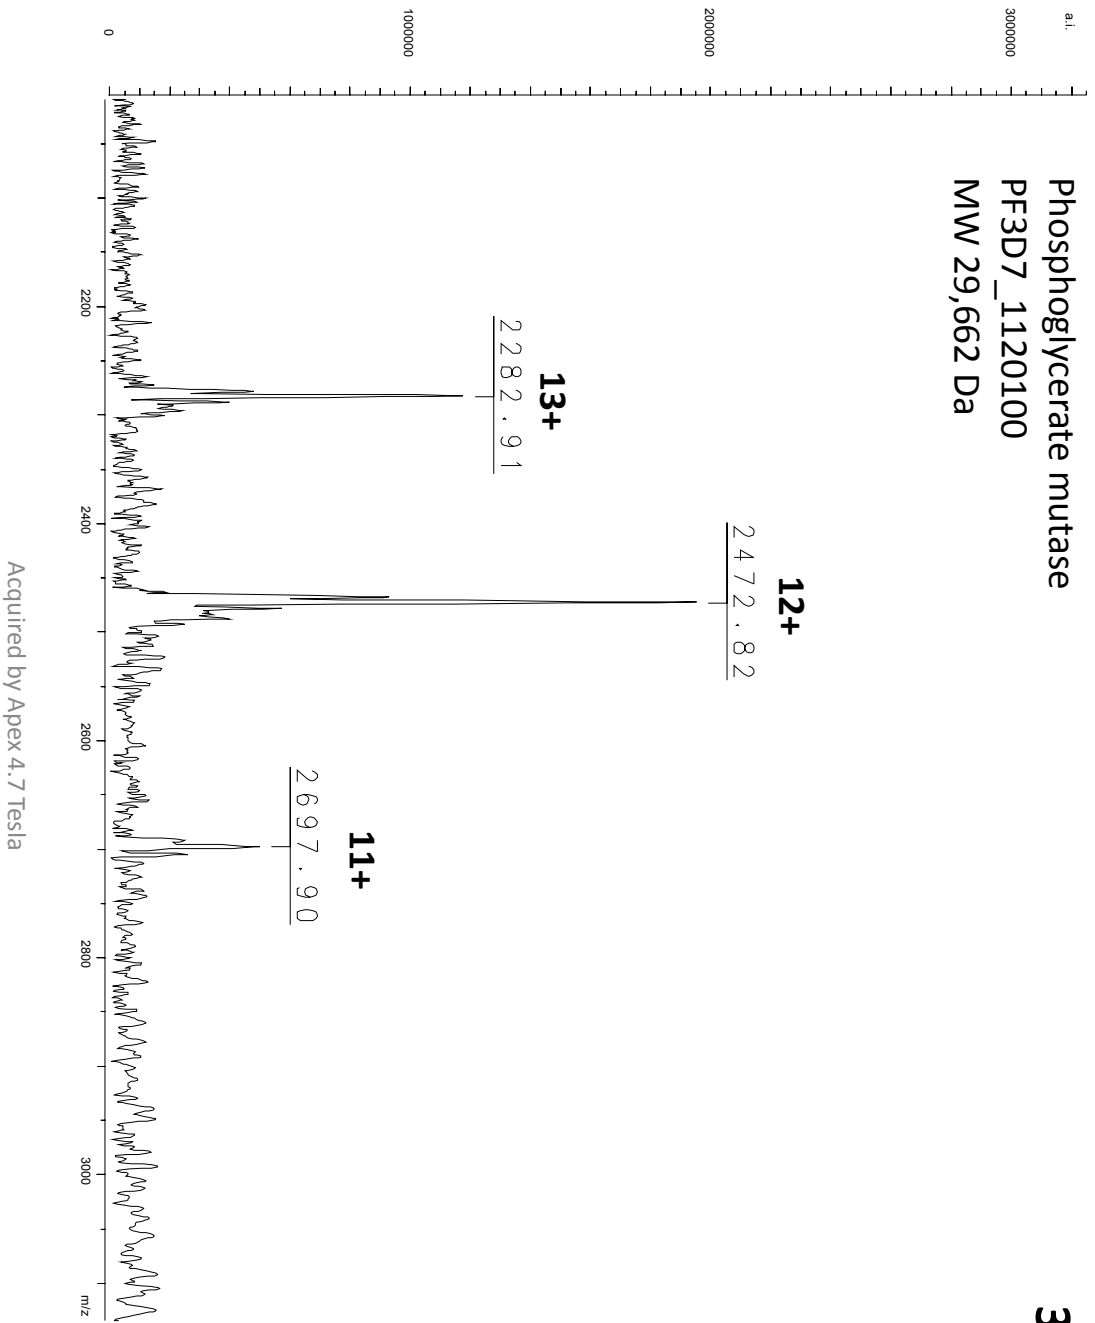



Cyclophilin  
PF3D7\_0528700  
24,263 Da

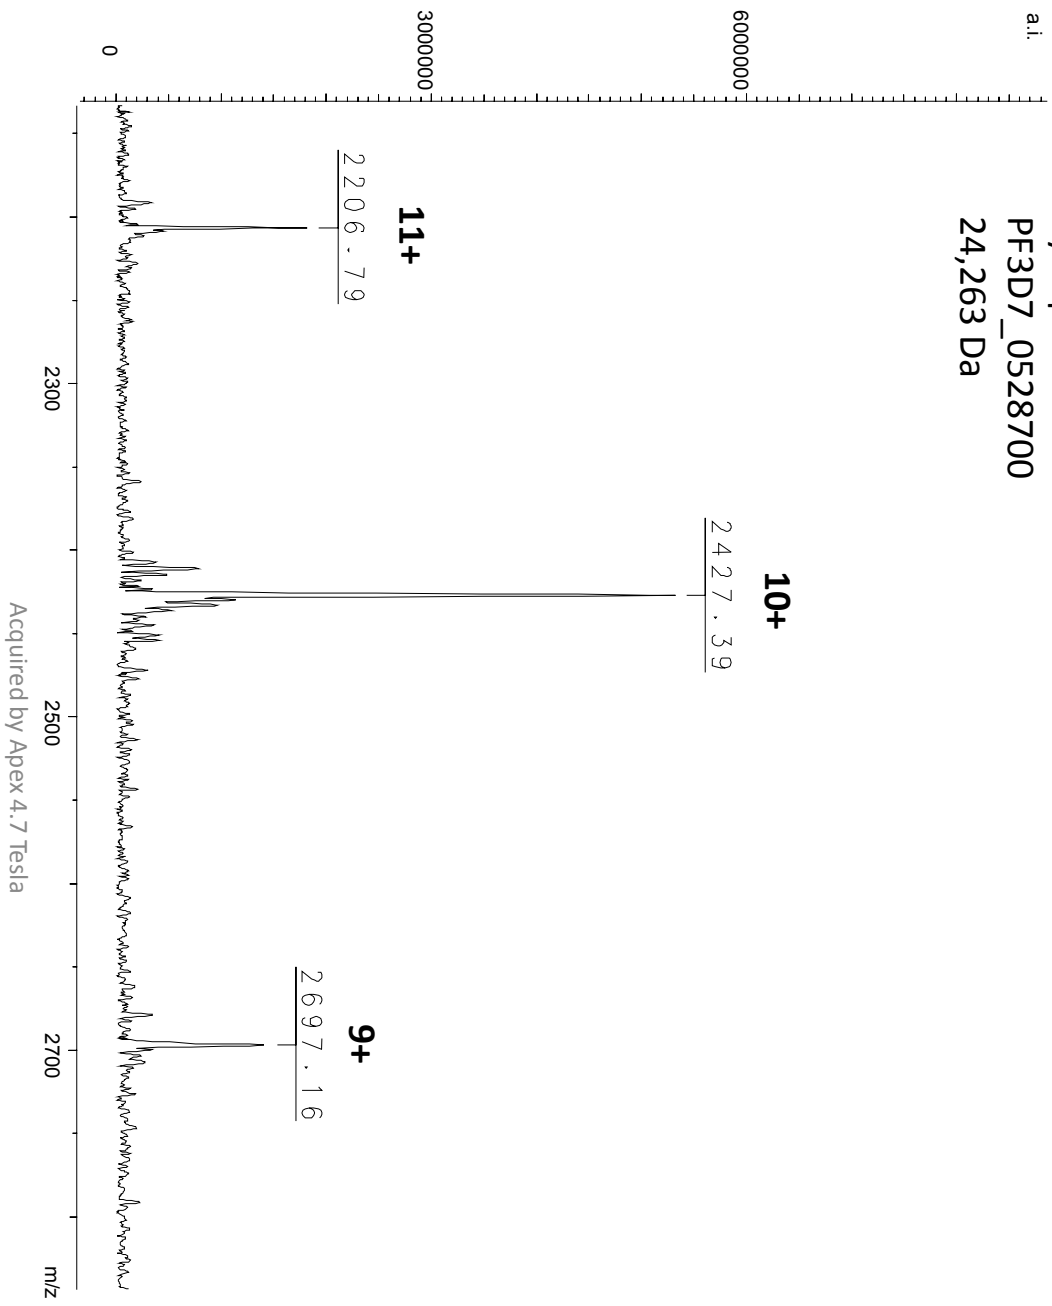

Ribose 5-phosphate isomerase  
PF3D7\_0514600  
MW 27,072 Da

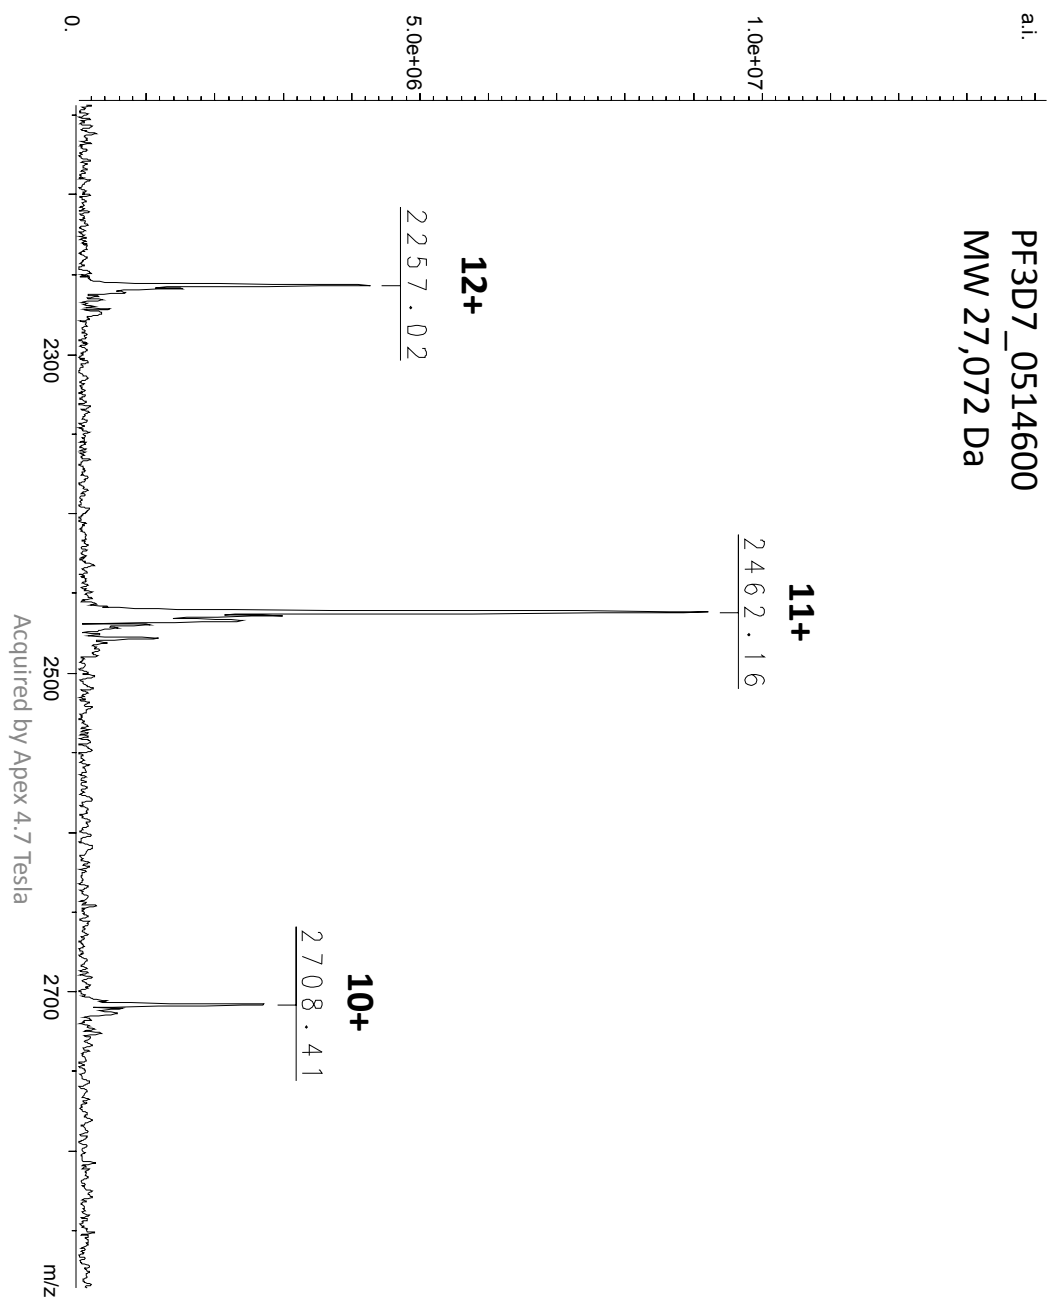

38

a.i.  
D-ribulose-5-phosphate 3-epimerase  
PF3D7\_1219900  
MW 25,780 Da

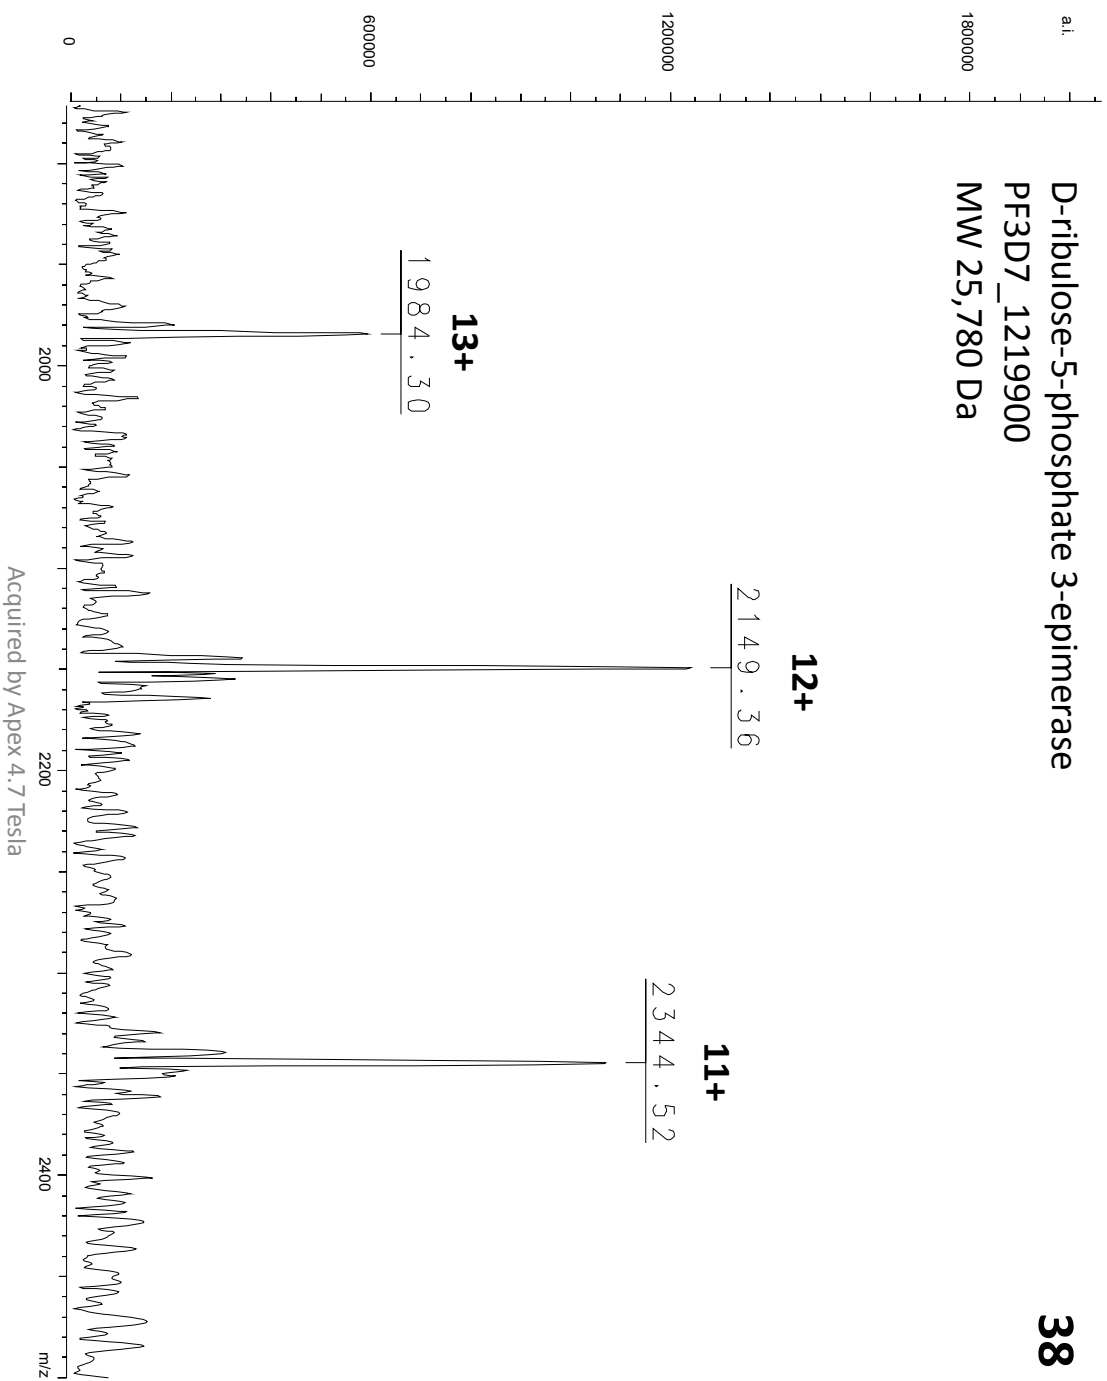

Prolyl- tRNase  
PF3D7\_0925300  
MW 58,213 Da/ 116,426 Da (dimer)

39

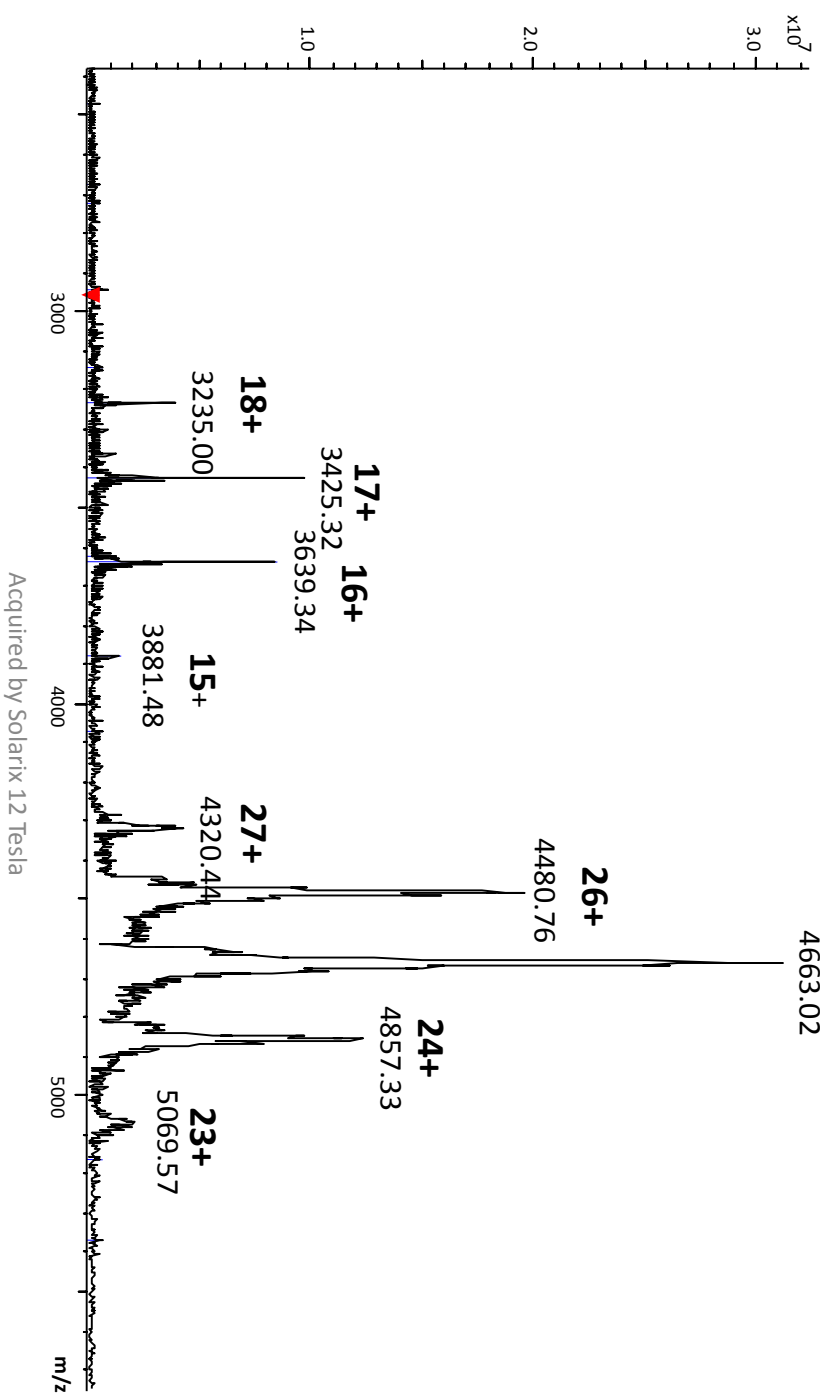

Ubiquitin conjugating enzyme E2  
PF3D7\_0305700  
MW 17,886 Da

40

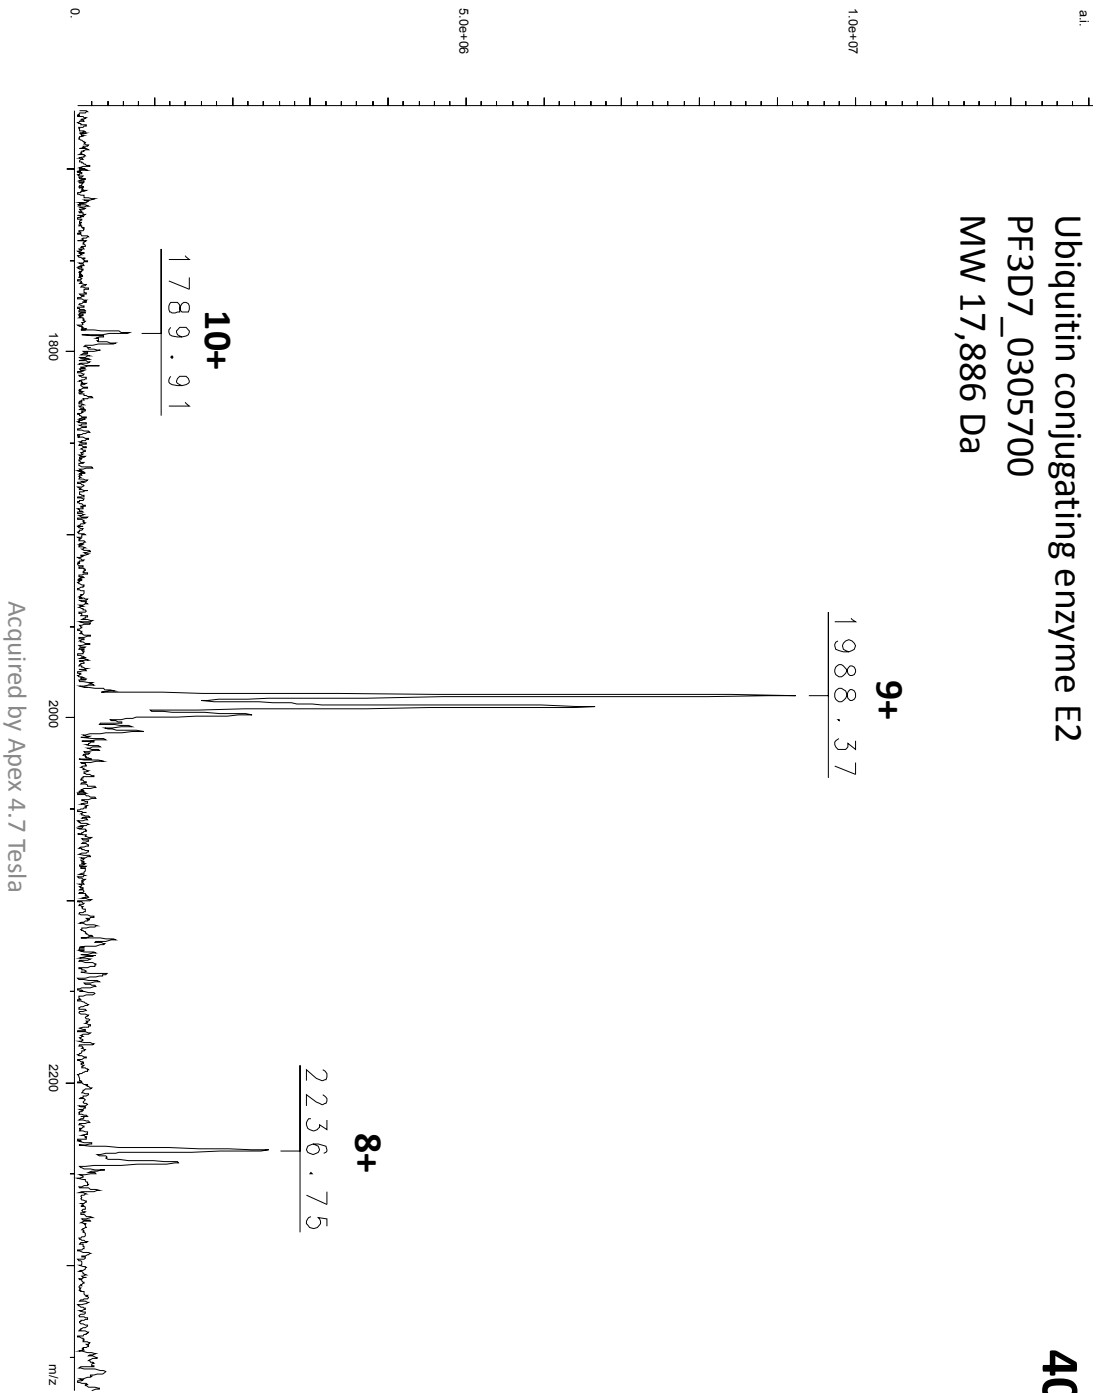

a.i.

Adenylosuccinate synthetase  
PF3D7\_1354500  
MW 51,461 Da/102,922 Da

**41**

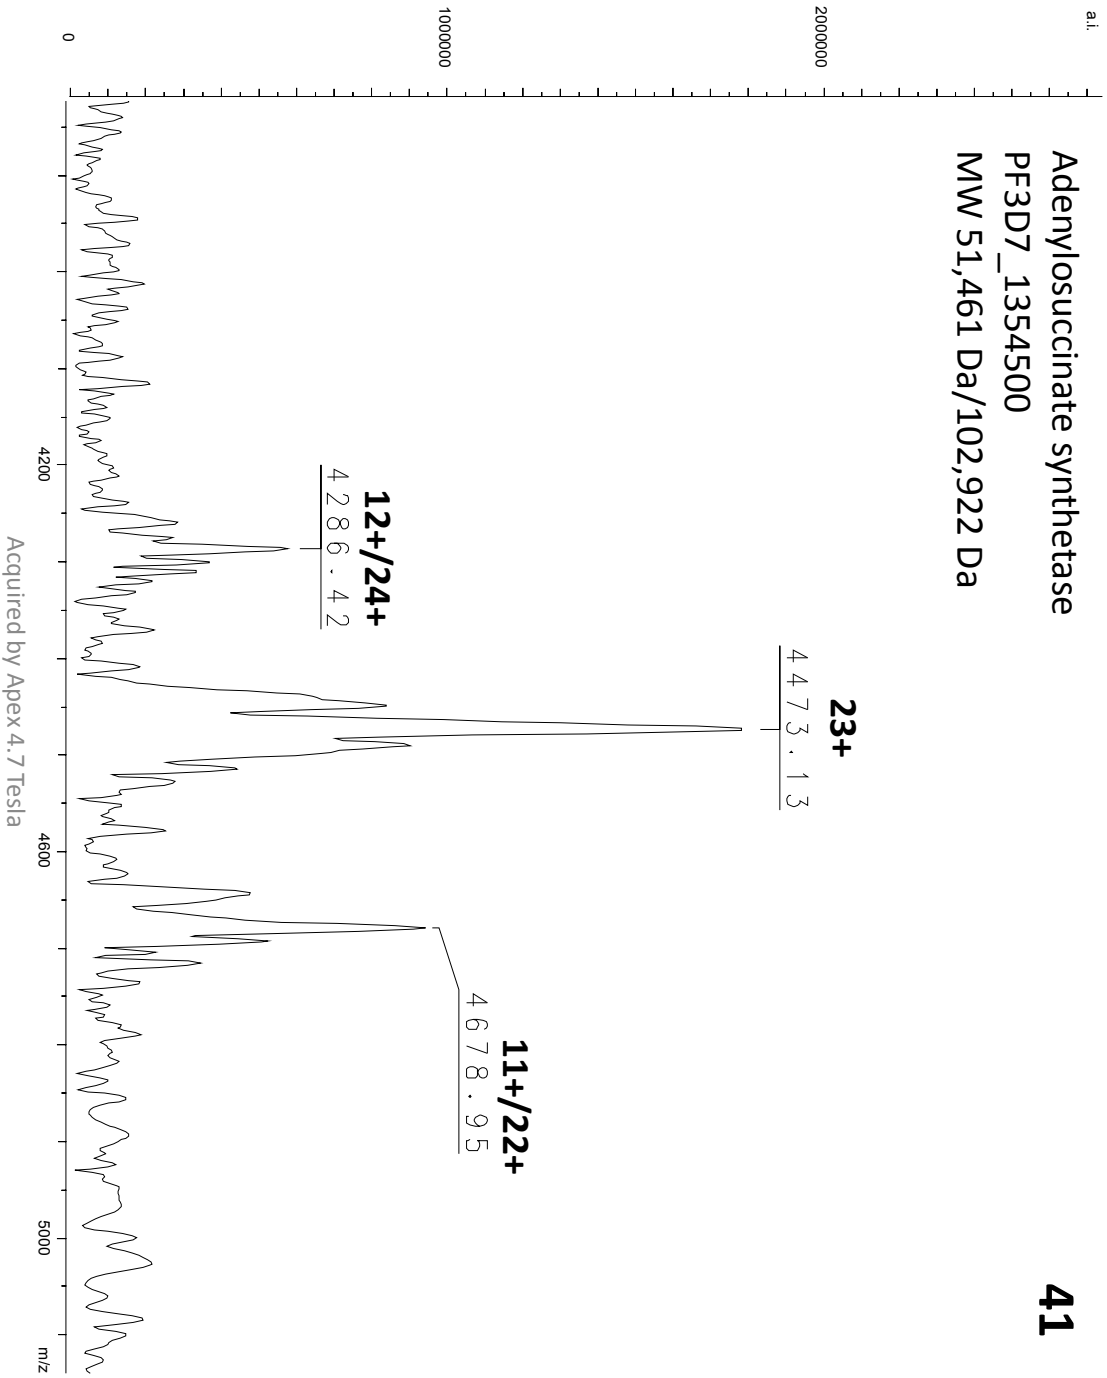

a.i.

Tryptophan tRNA ligase  
PF3D7\_1336900  
MW 47,746 Da

42

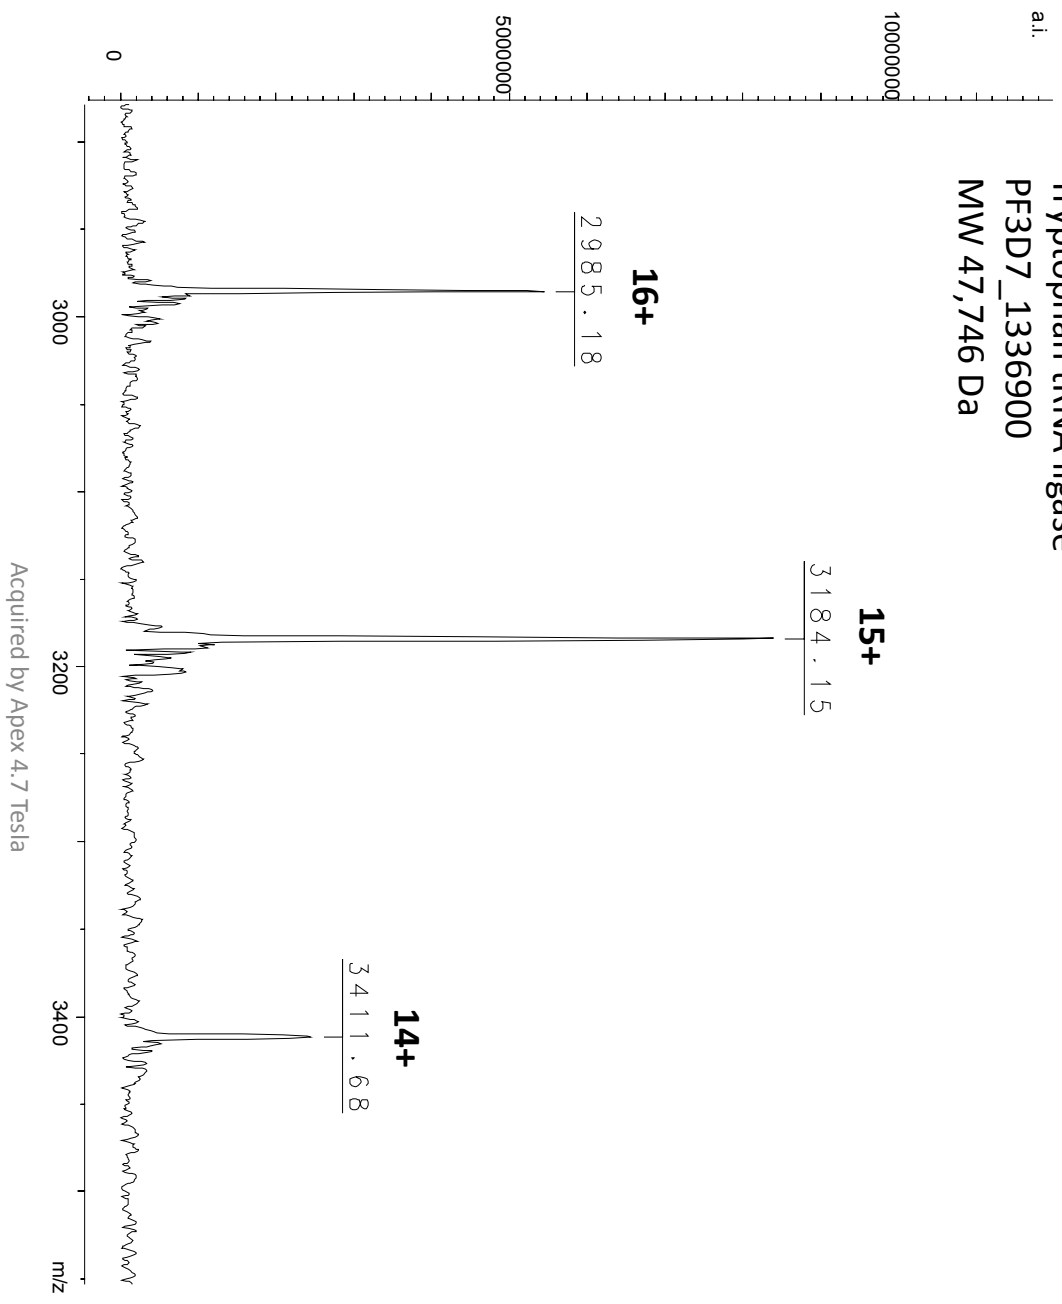

43

Ubiquitin conjugating enzyme E2  
PF3D7\_1203900  
MW 17,431 Da

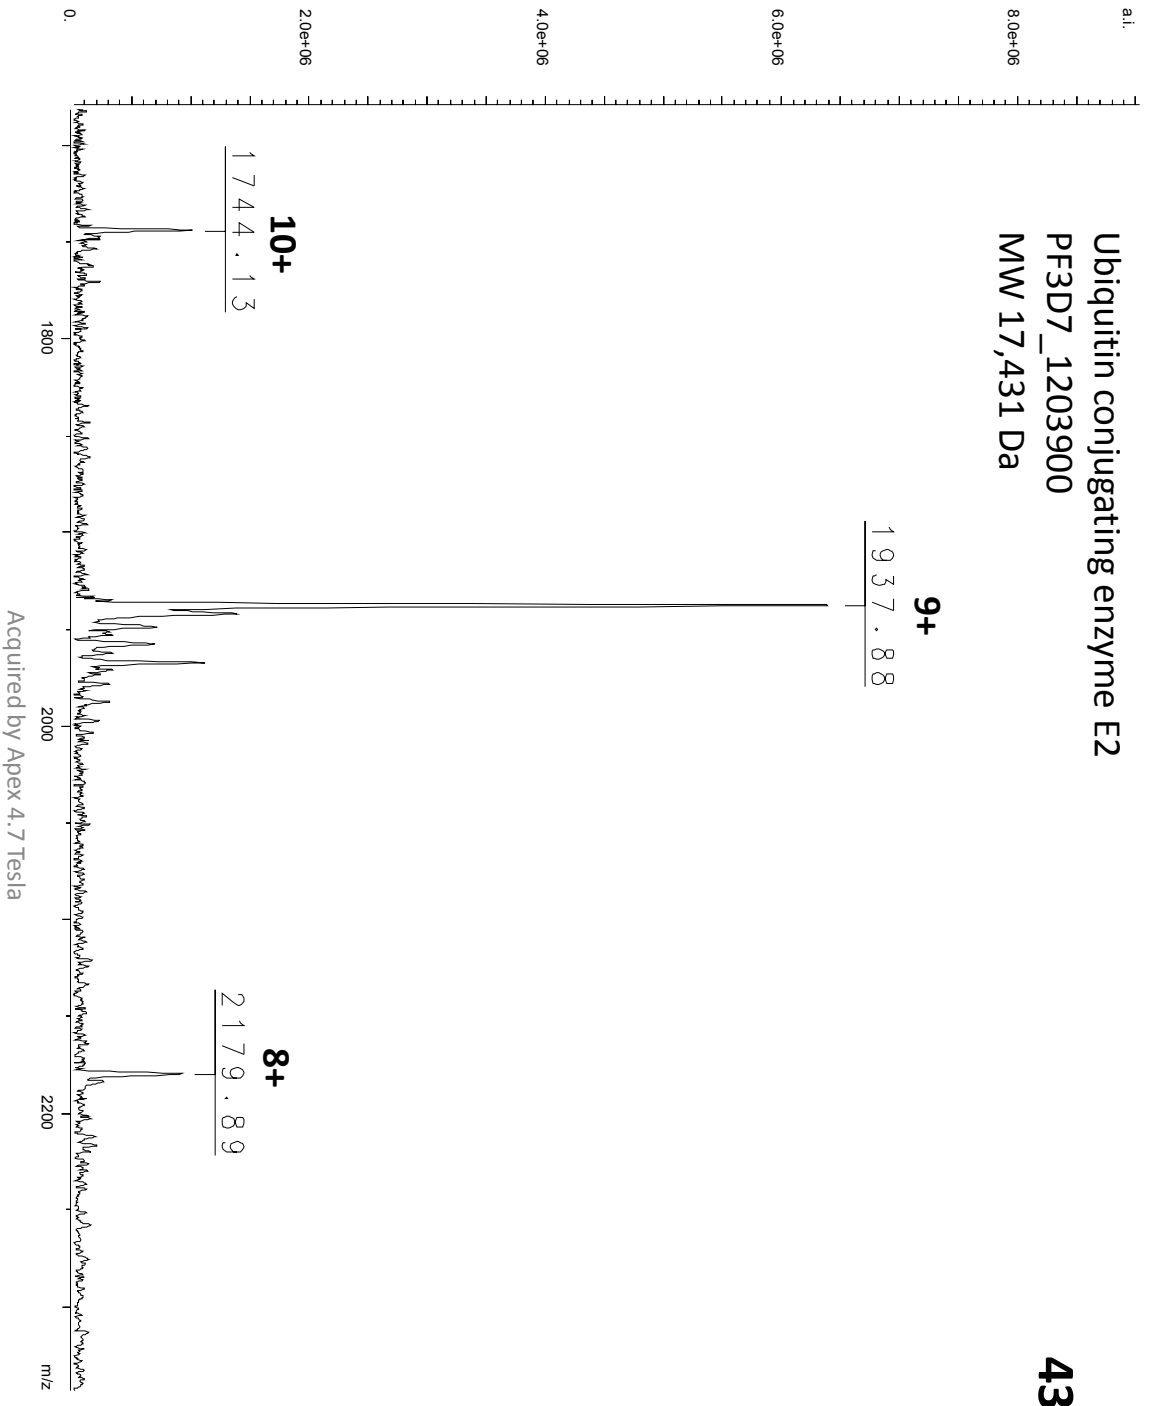



a.1  
8.0e+06

Ubiquitin conjugating enzyme E2N  
PF3D7\_0527100  
MW 19,176 Da

**44**

6.0e+06

**9+**  
2131.76

4.0e+06

**10+**  
1918.68

2.0e+06

0

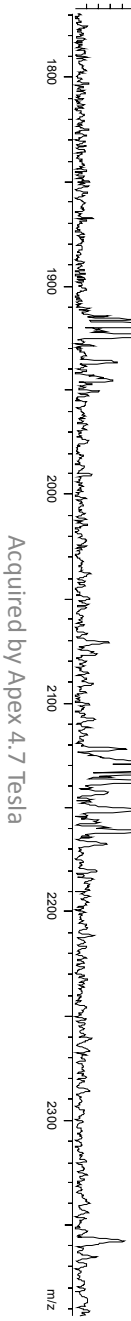

45

Ubiquitin conjugating enzyme  
PF3D7\_0812600  
MW 19,554 Da

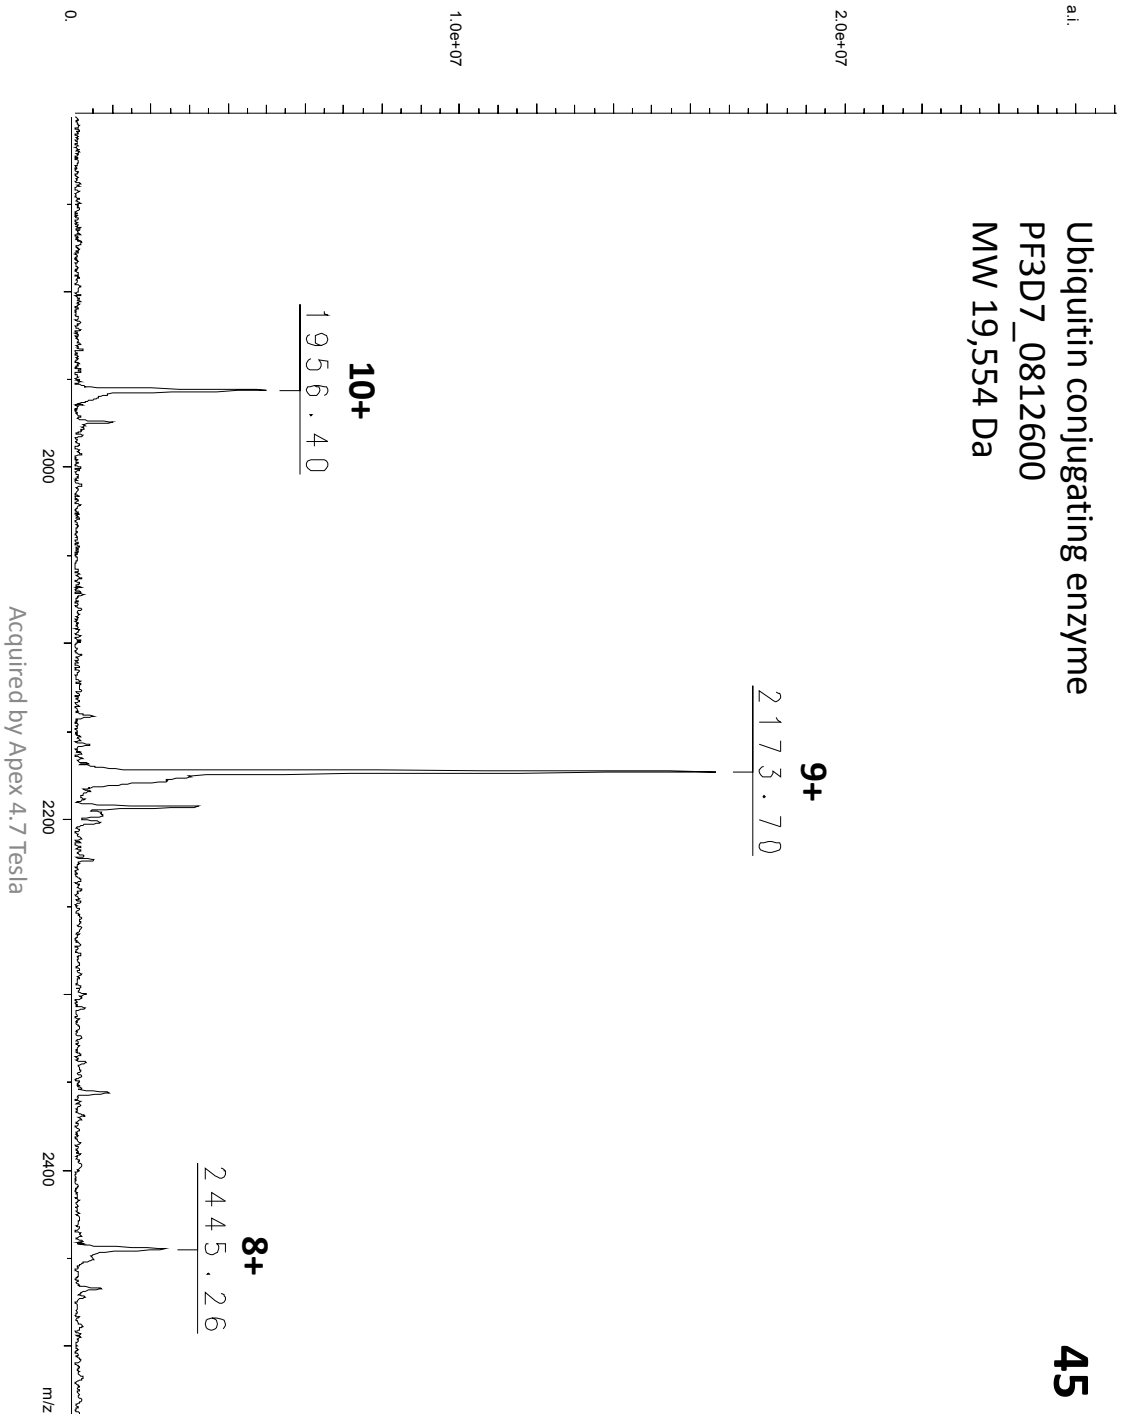

Ubiquitin Conjugating Enzyme  
PF3D7\_1033900  
MW 19,288 Da

46

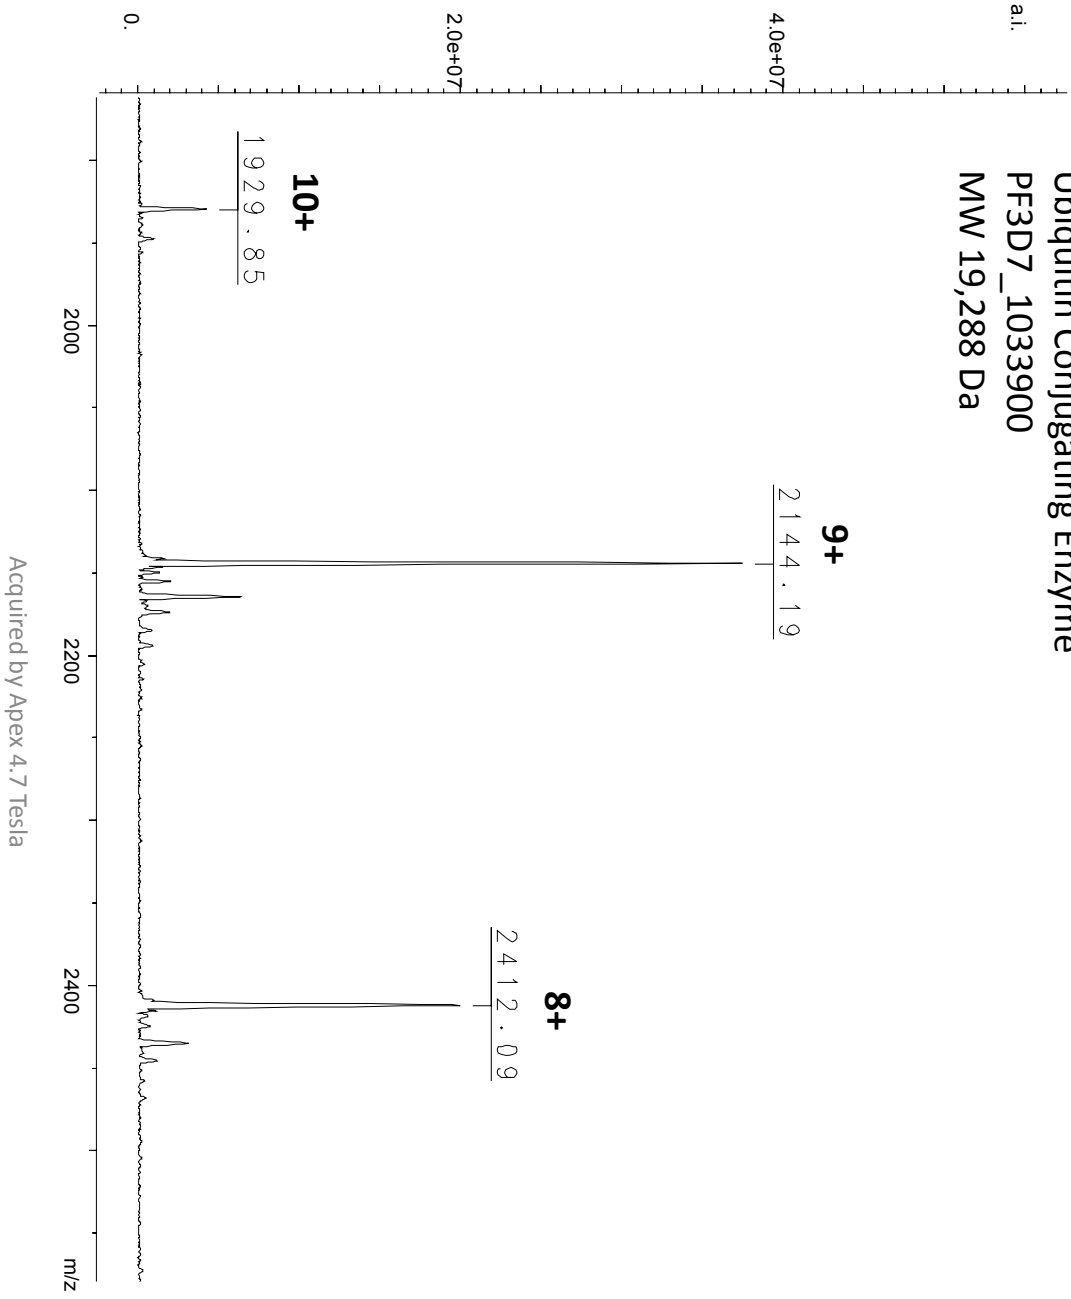

47

Ubiquitin conjugating enzyme  
PF3D7\_1356300  
MW 23,776 Da

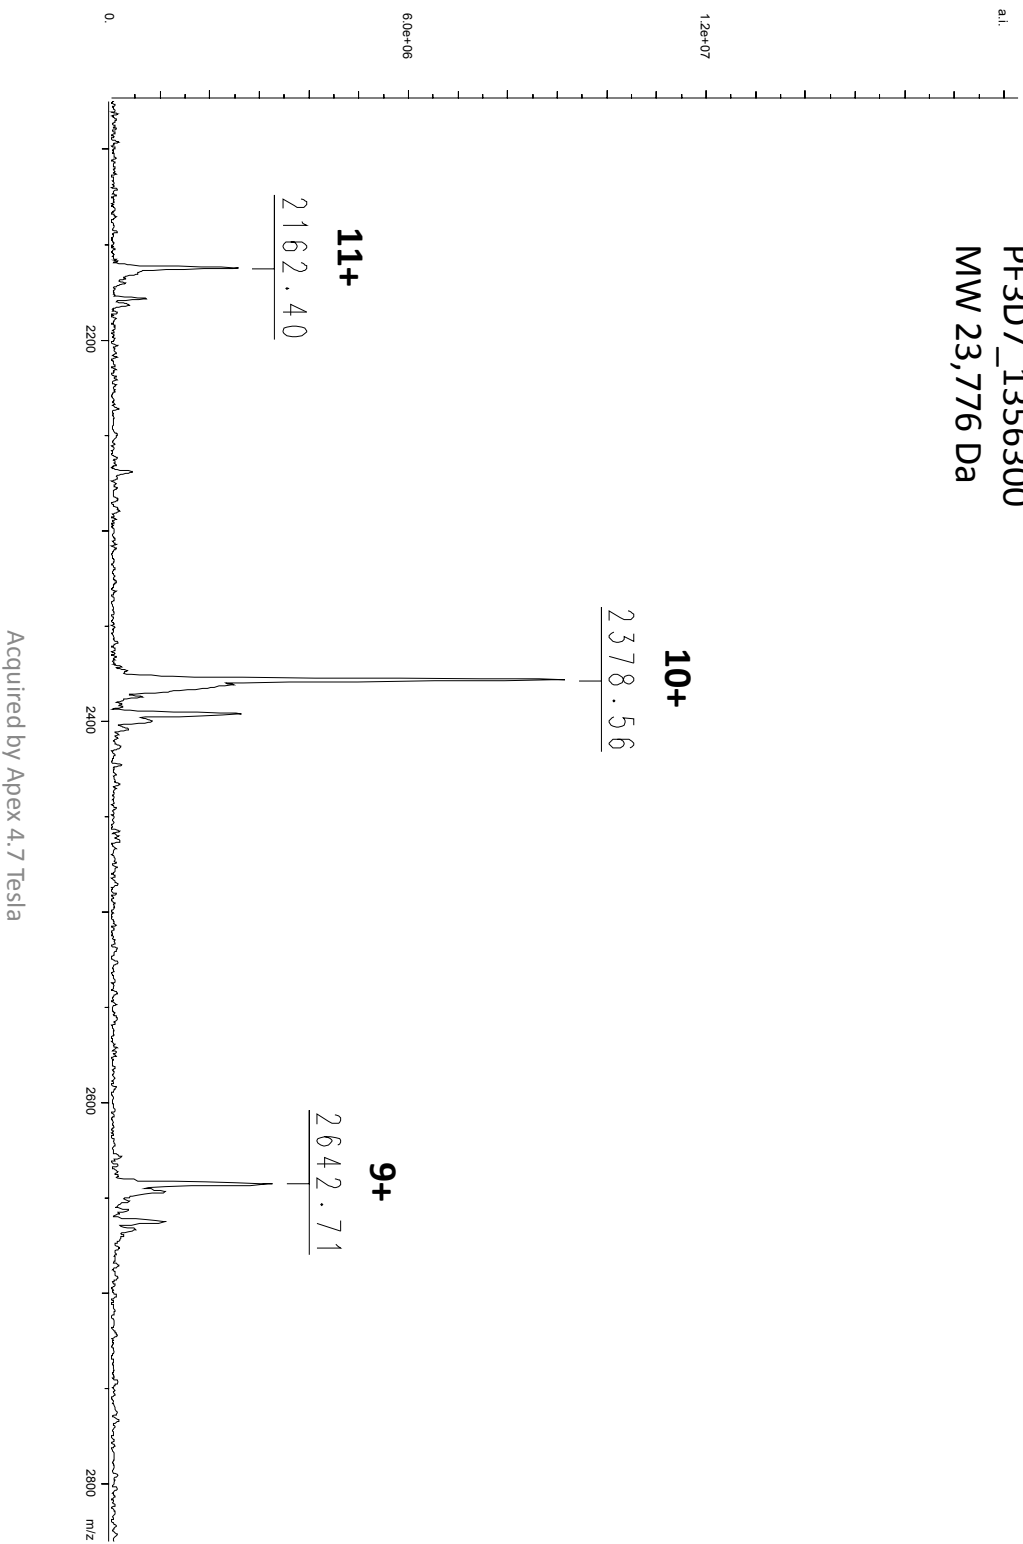

48

MTIP  
PF3D7\_1246400  
MW 16,482 Da

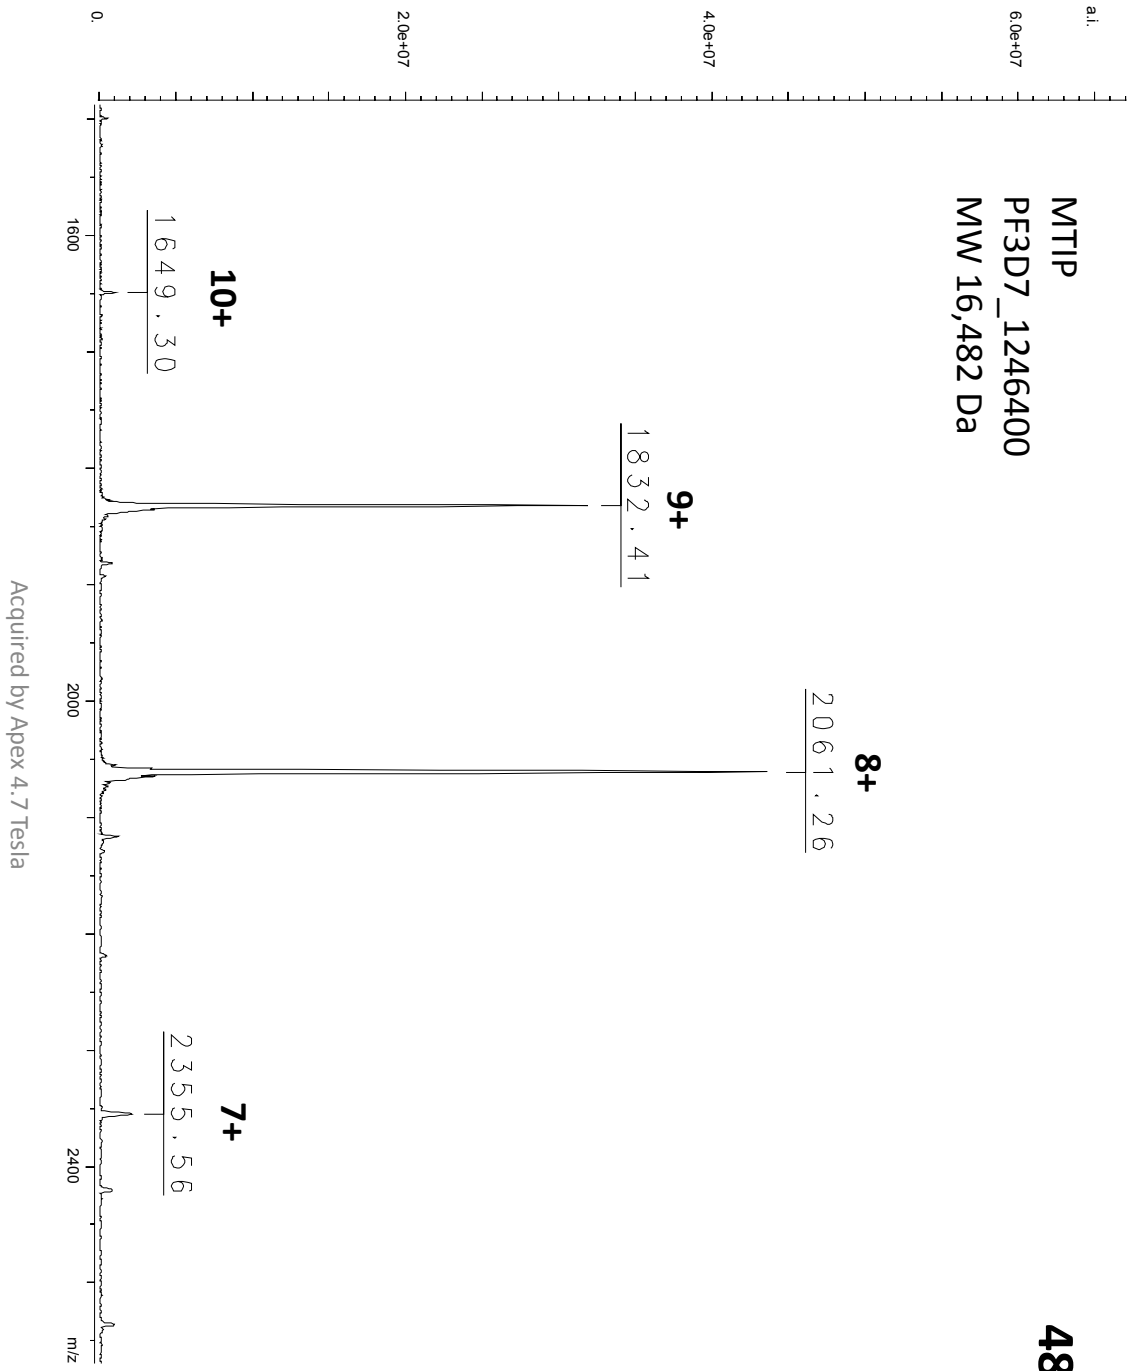

a.i.

Bacterial histone-like protein (HU homolog)  
PF3D7\_0904700  
MW 34,805 Da

49

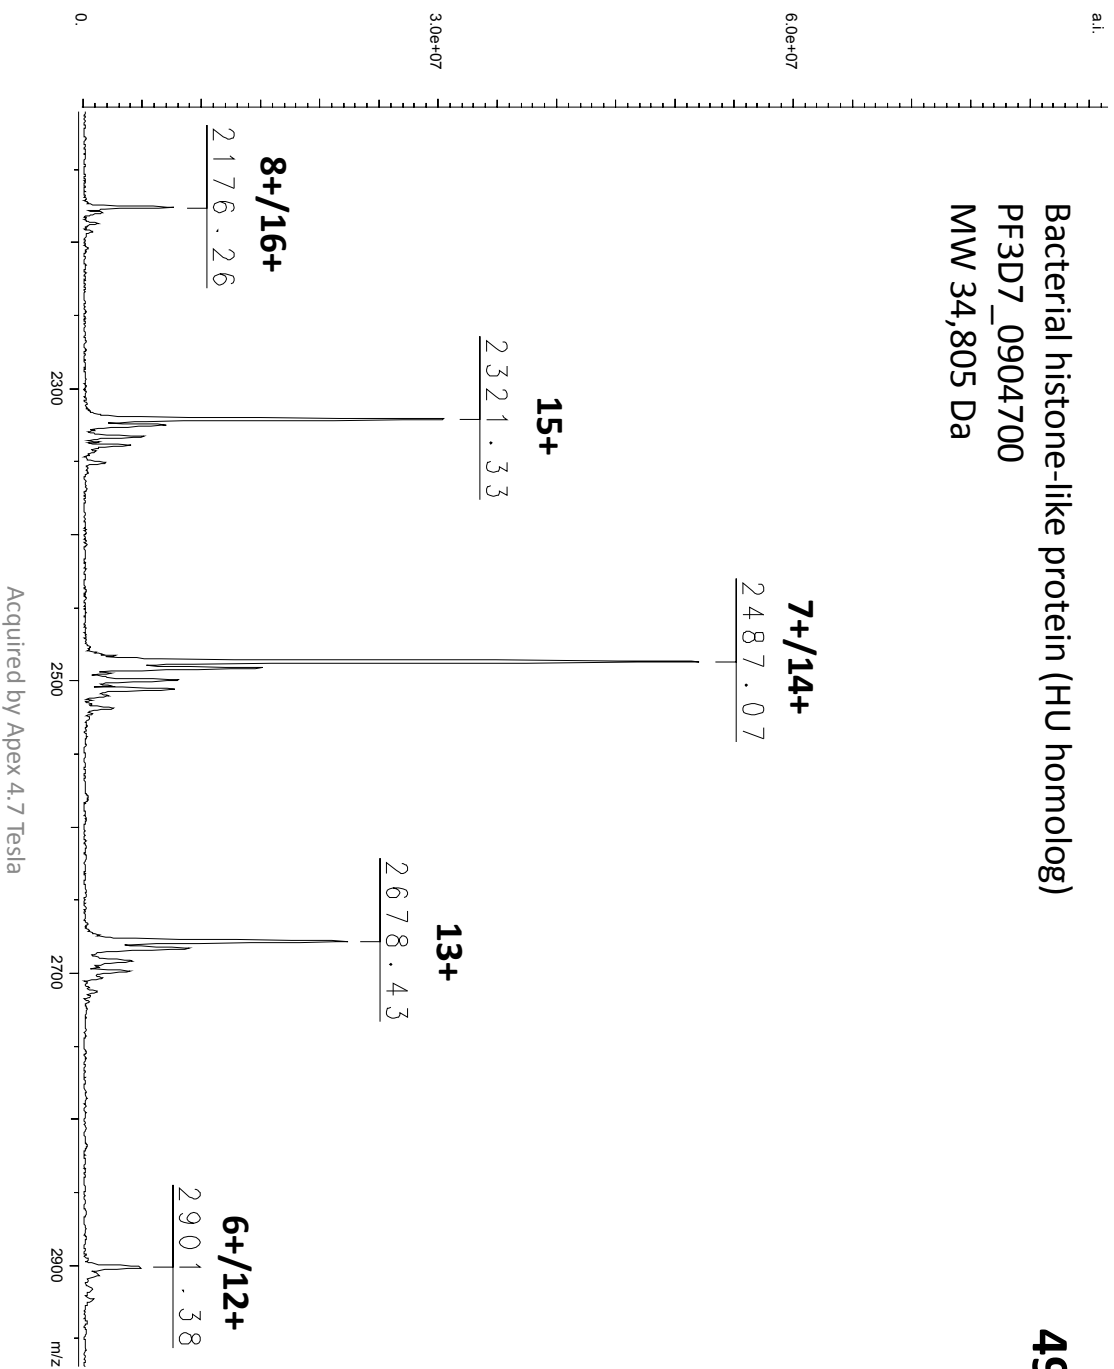

Phosphatidylethanolamine-binding protein  
PVX\_123630  
MW 22,802/45,606 Da

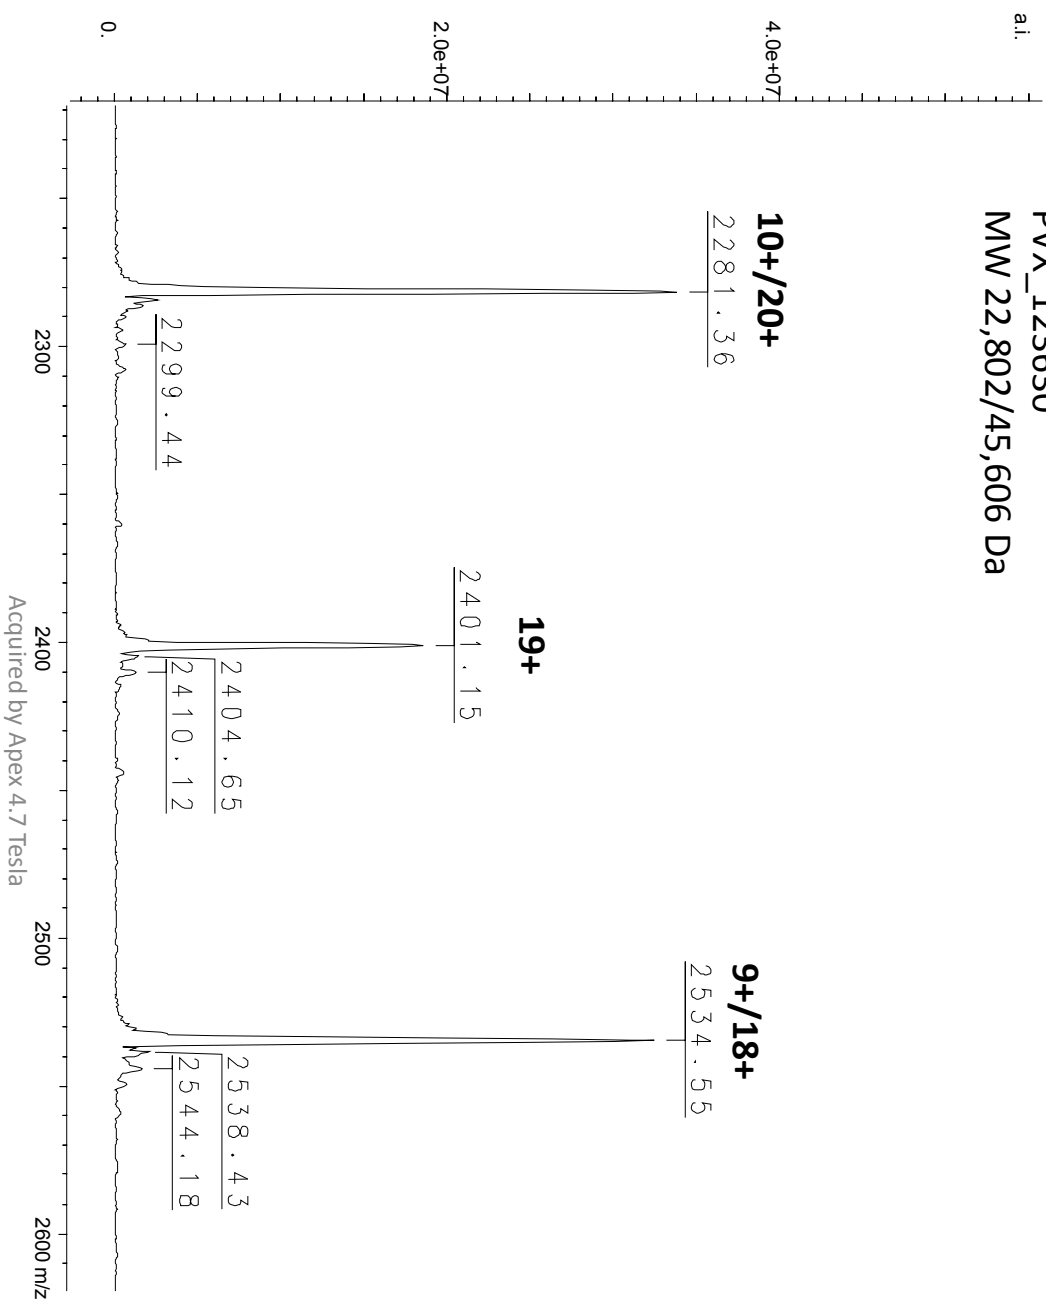

a.i.  
6.0e+06

Dynein light chain 1  
PF3D7\_1213600  
MW 11,544 Da/23,088 Da

**51**

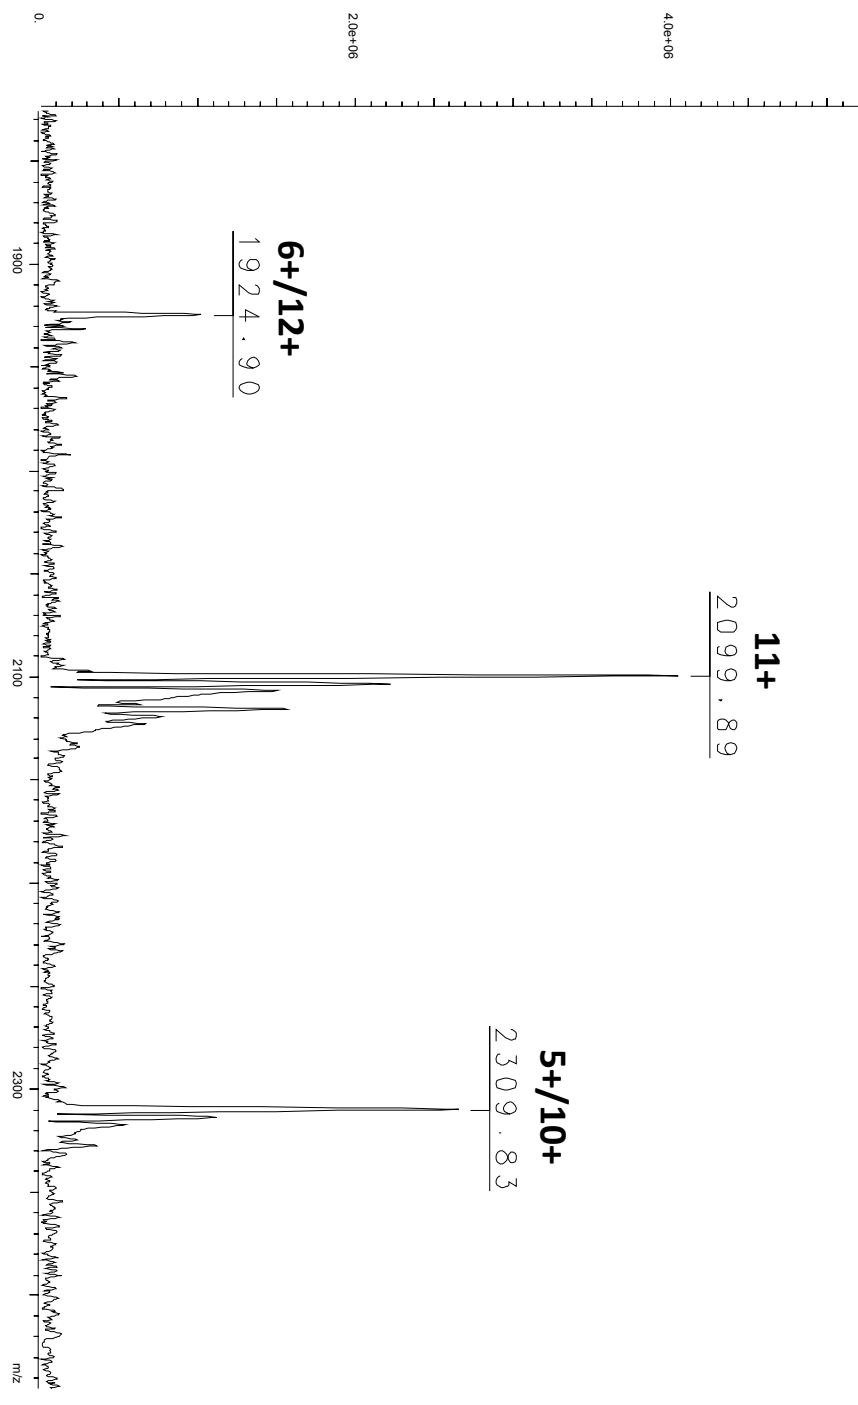



Circumsporozoite surface protein (CSP)  
PF3D7\_0304600  
MW 26,787 Da

**52**

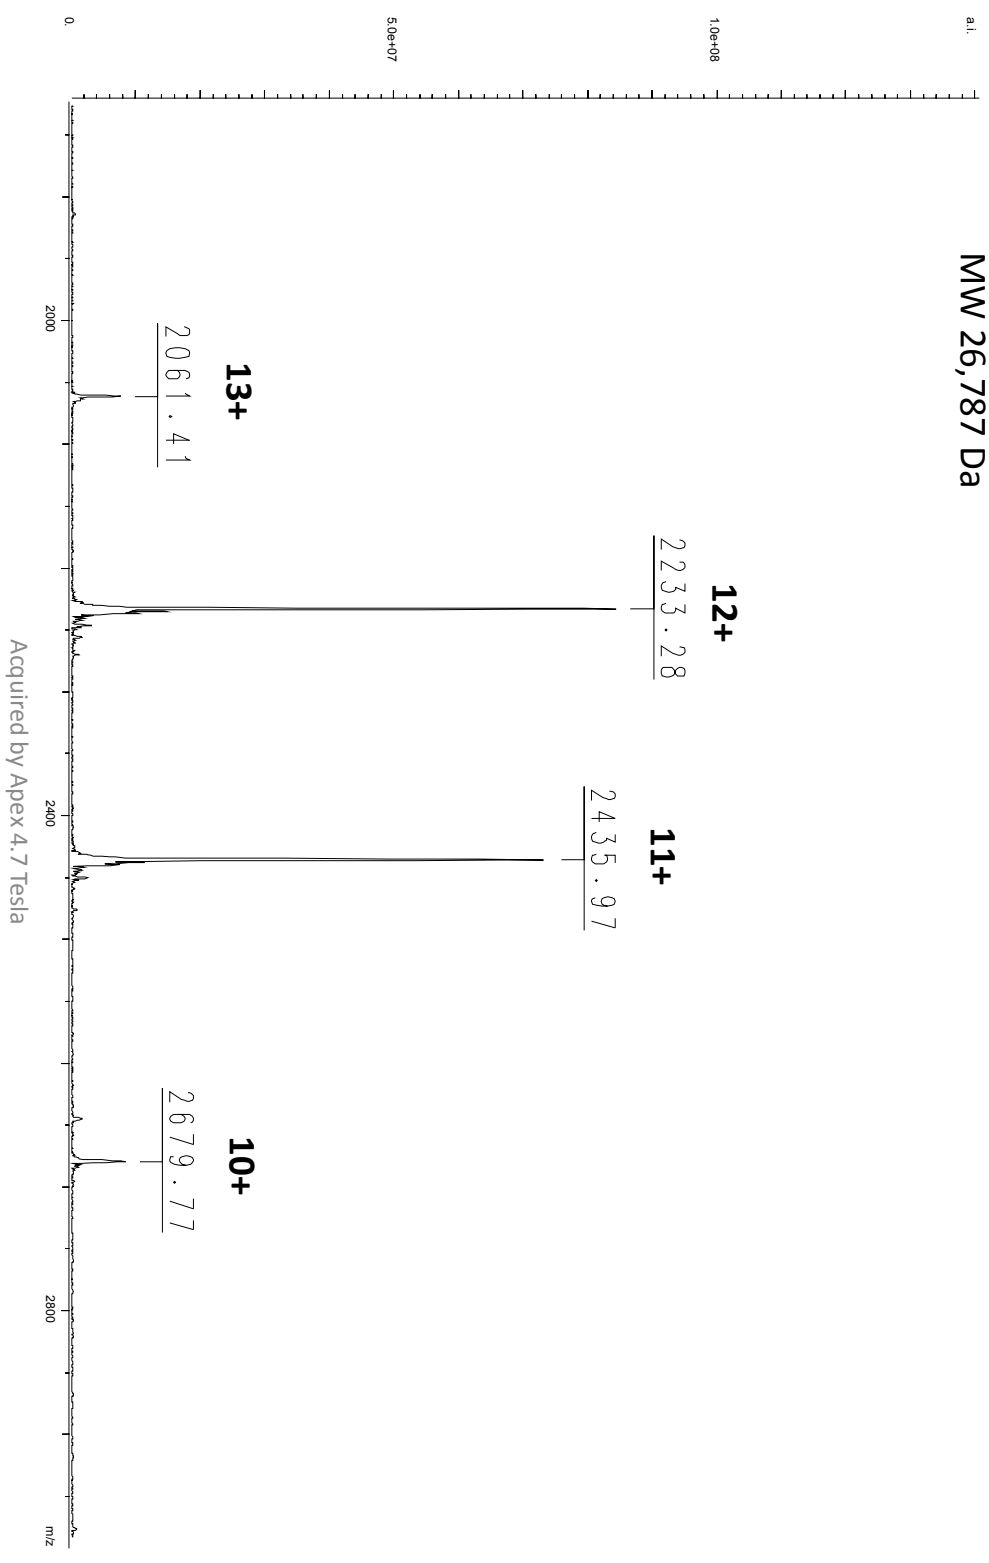

a.i.  
Conserved protein, unknown function  
PF3D7\_1351100  
MW 19,603 Da

**53**

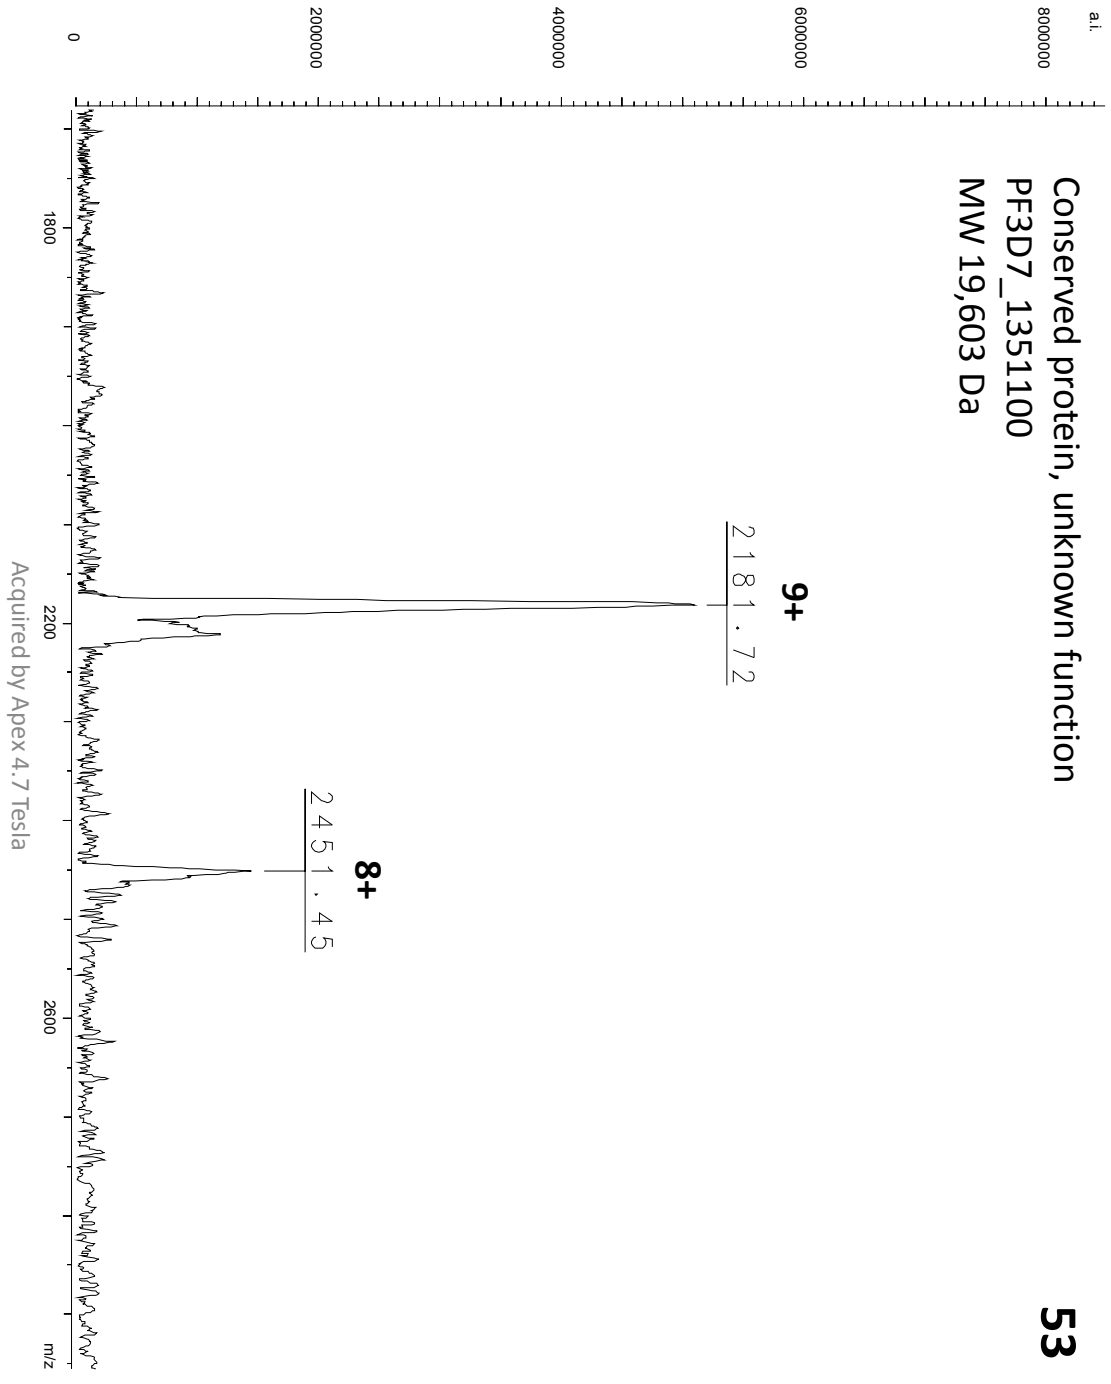

ri.

Vacuolar protein-sorting protein (VPS2)  
PF3D7\_0816200  
MW 25,722 Da

**54**

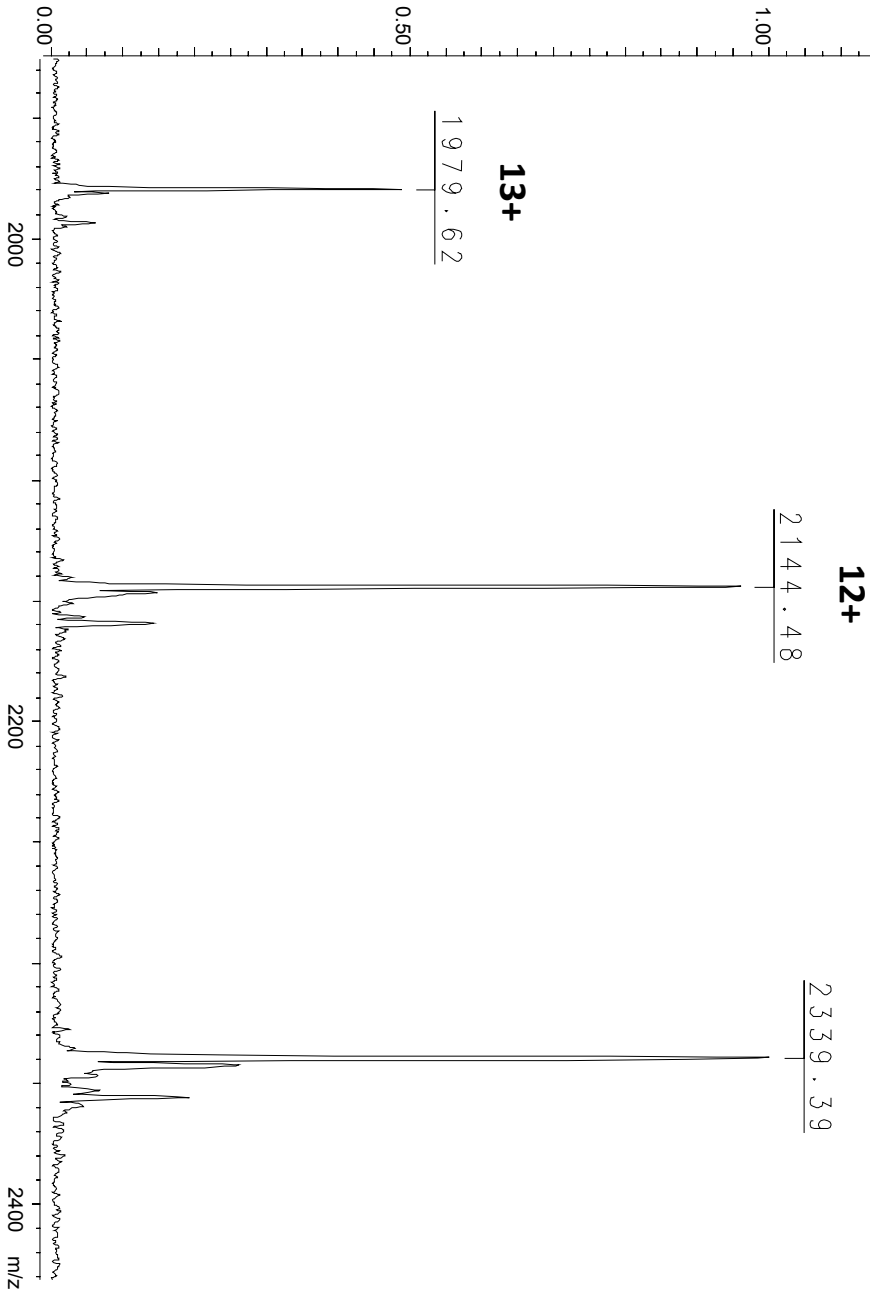

Acquired by Apex 4.7 Tesla

Eukaryotic translation initiation factor 5A (eIF5a)  
PF3D7\_1204300  
MW 18,529 Da

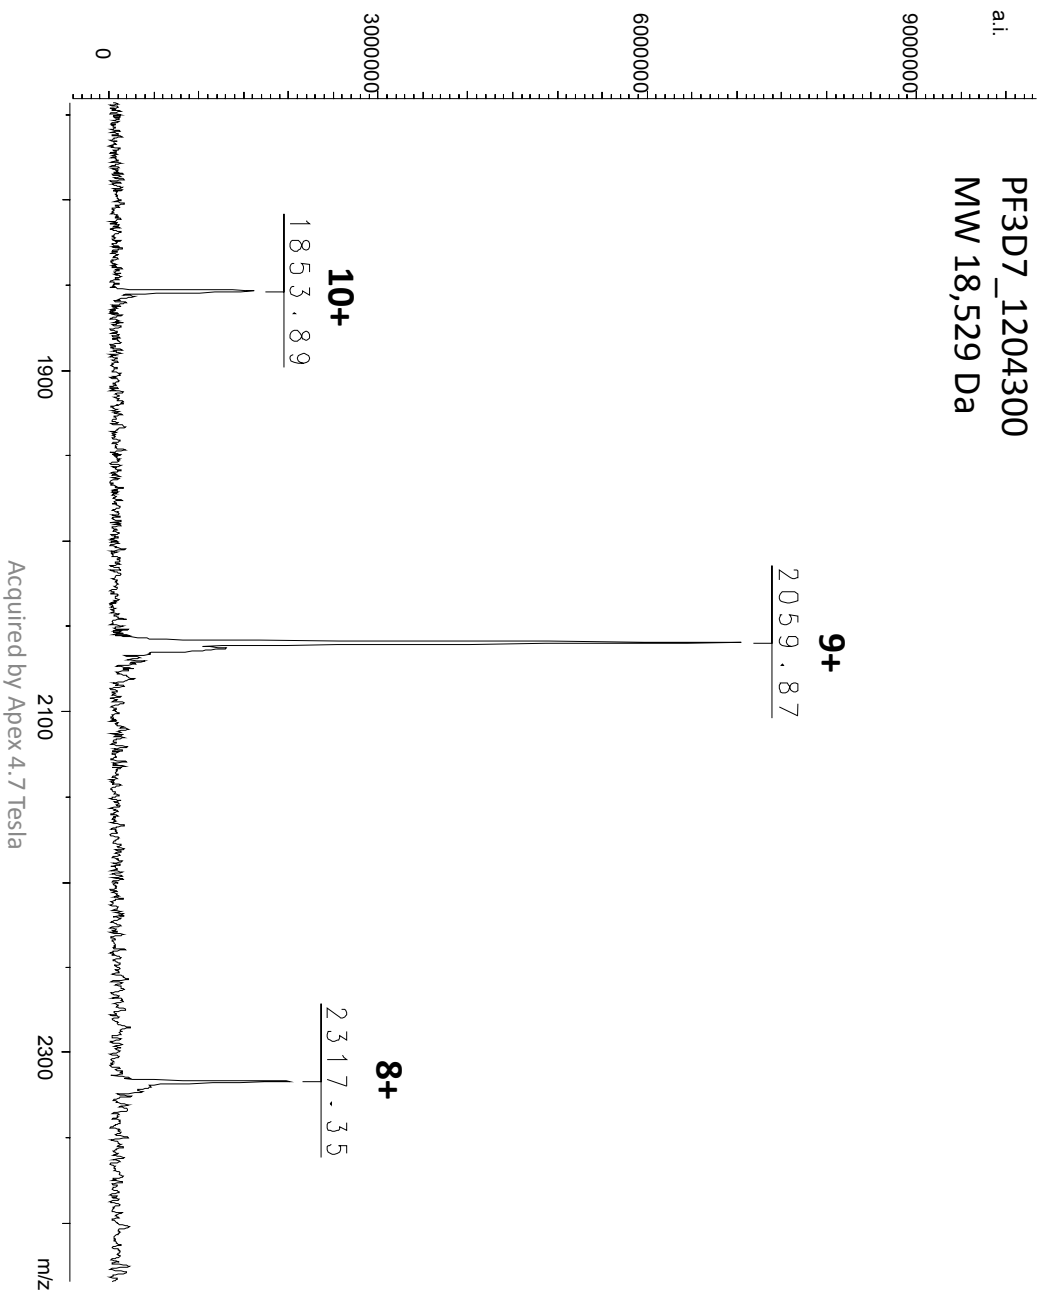

a.i.  
6-pyruvoyltetrahydropterin synthase  
PvX\_114505  
MW 21,975 Da

56

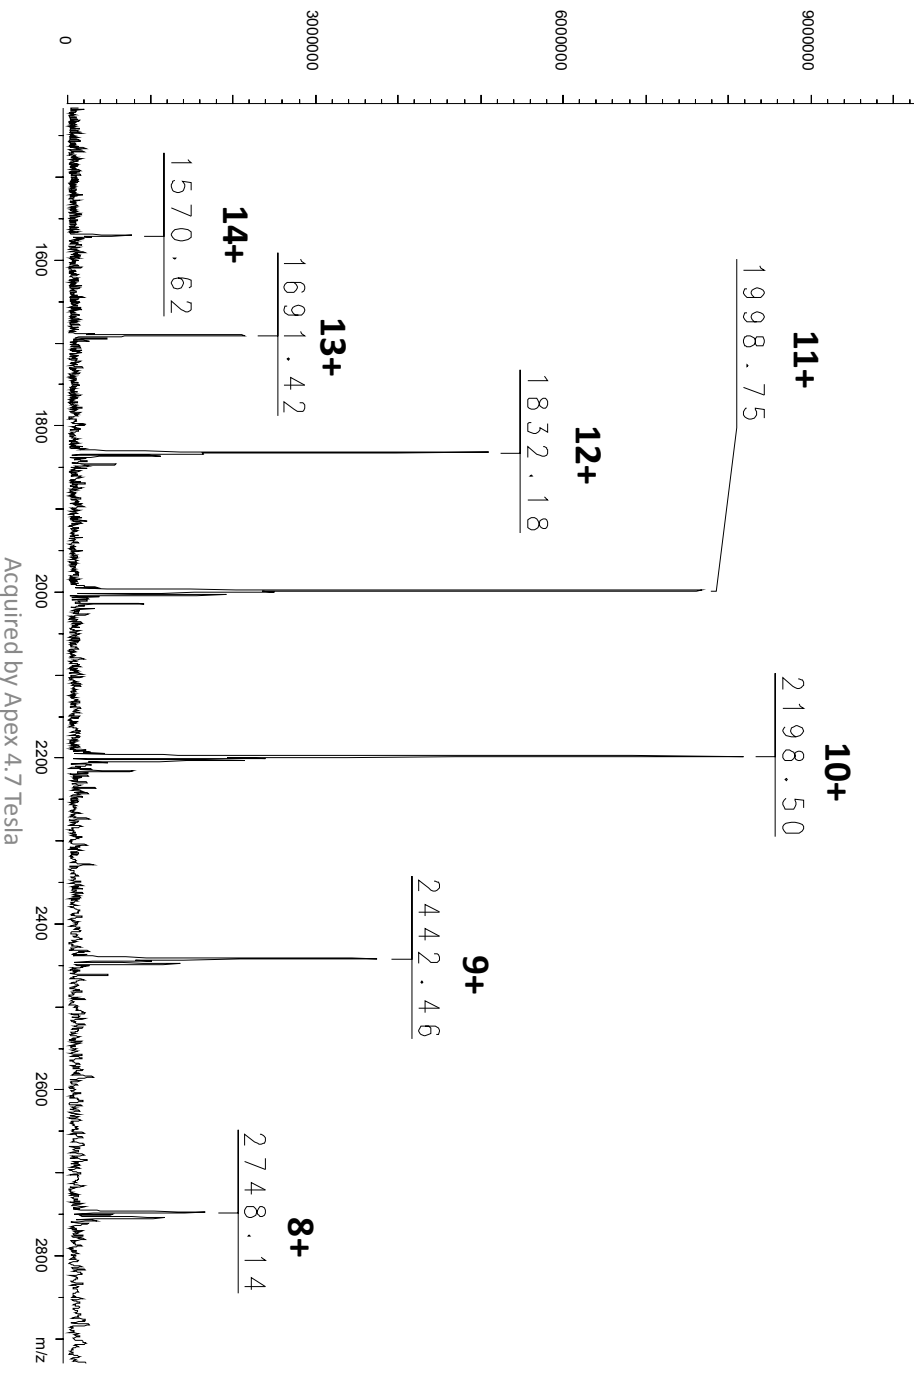

a.i.

Sexual stage-specific protein precursor (Pfs16)  
PF3D7\_0406200  
MW 9,200 Da

**57**

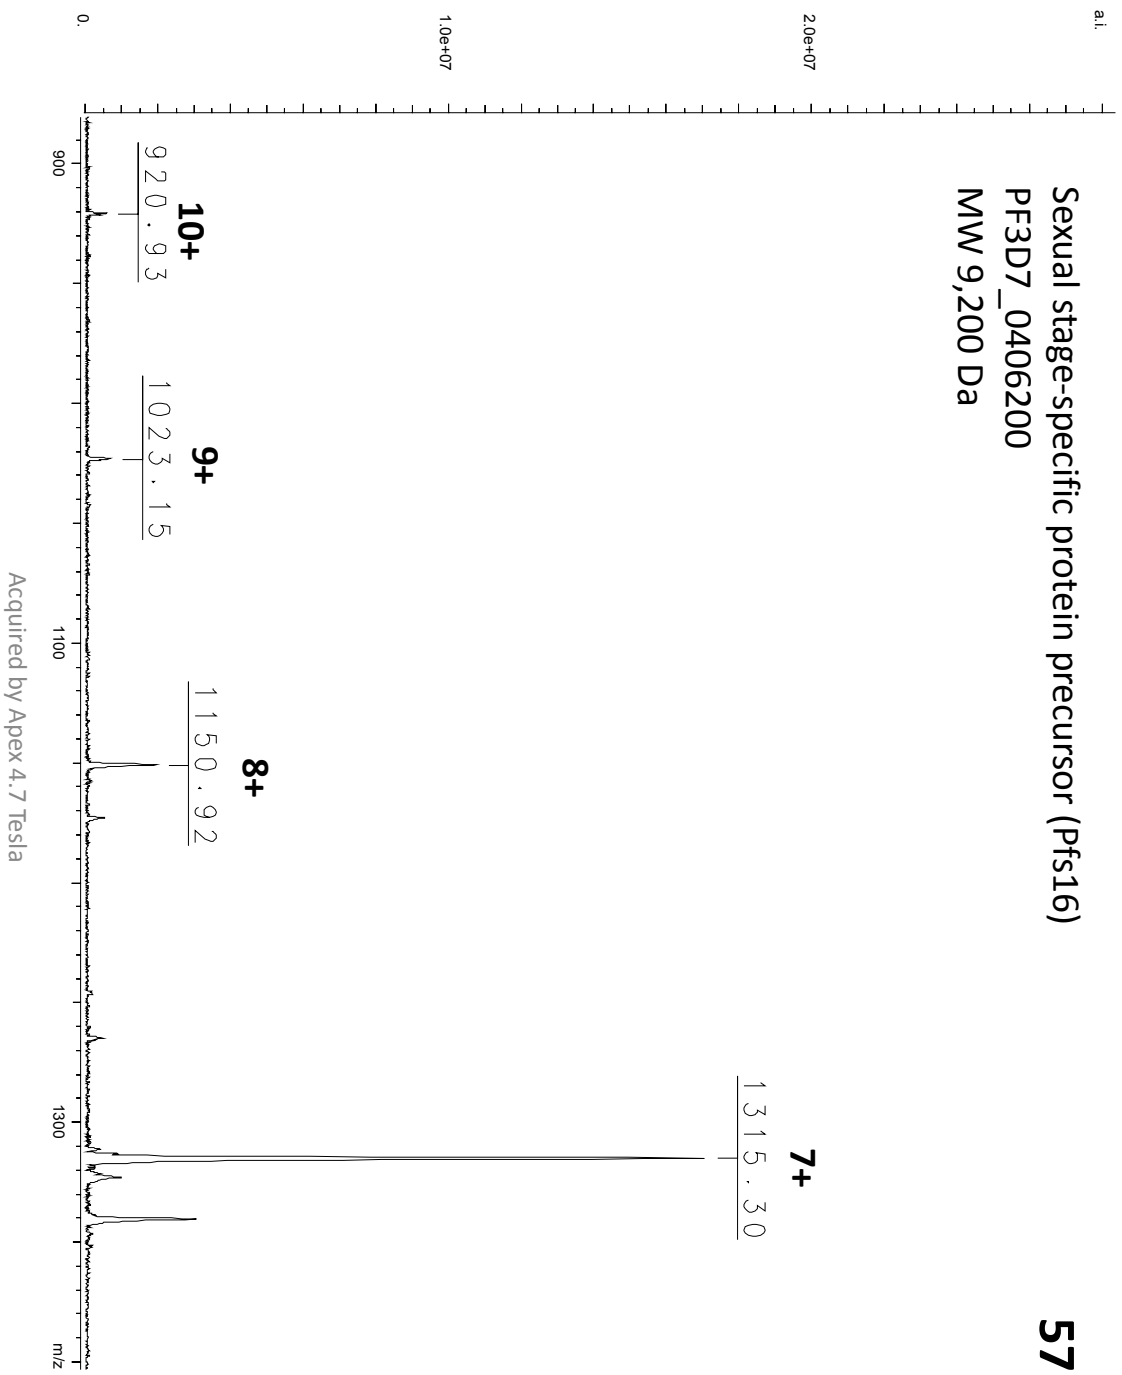

Cell traversal protein for ookinetes and sporozoites (CeTOS)  
PF3D7\_1216600  
MW 17,683 Da

58

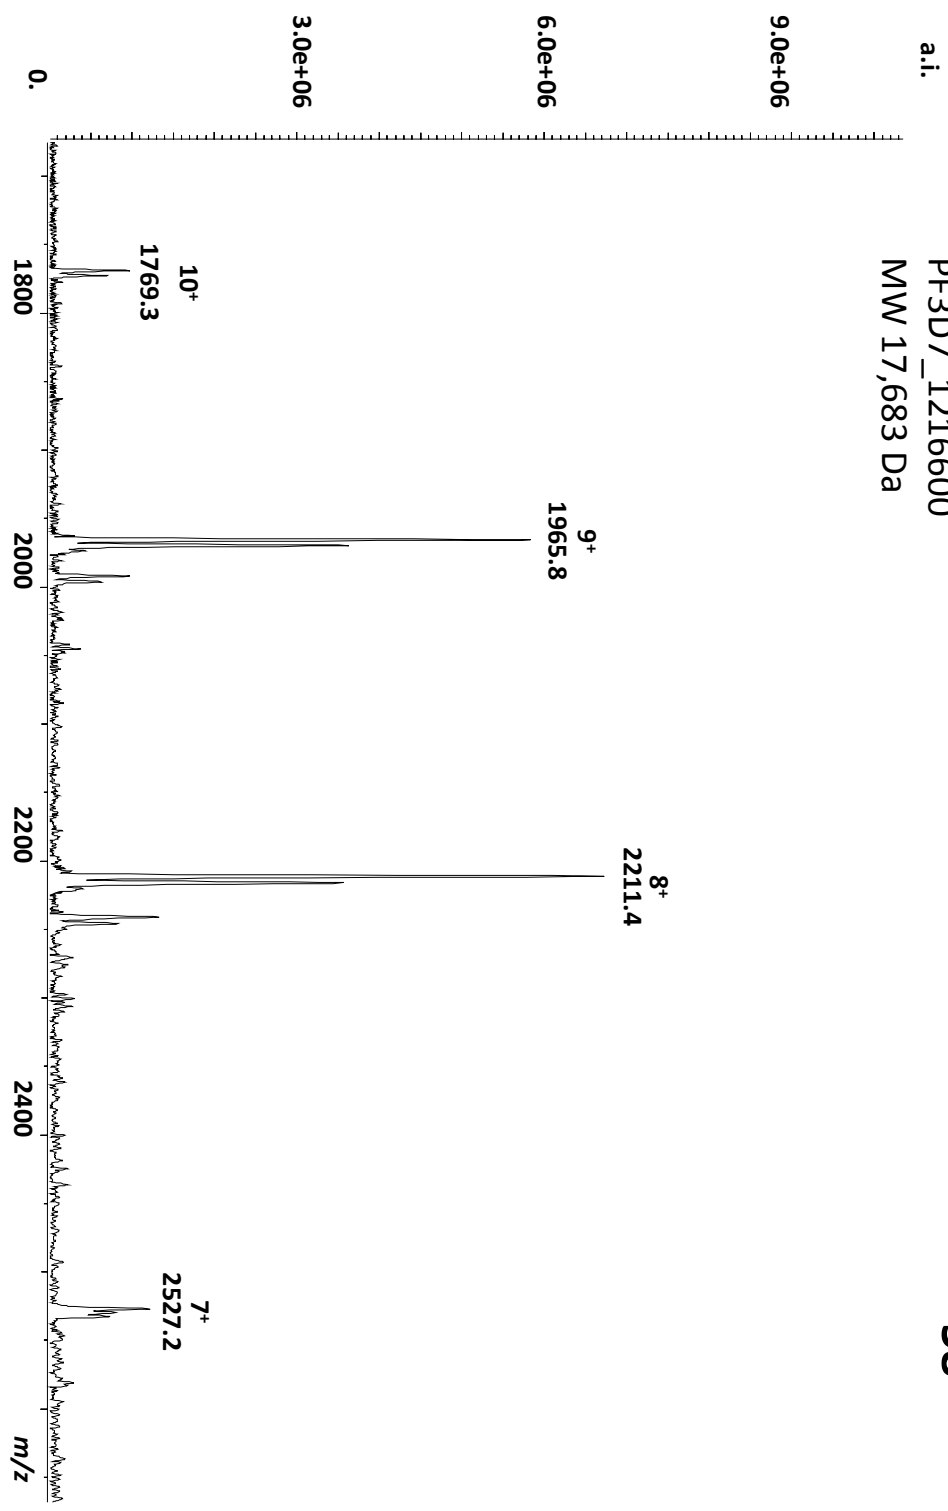

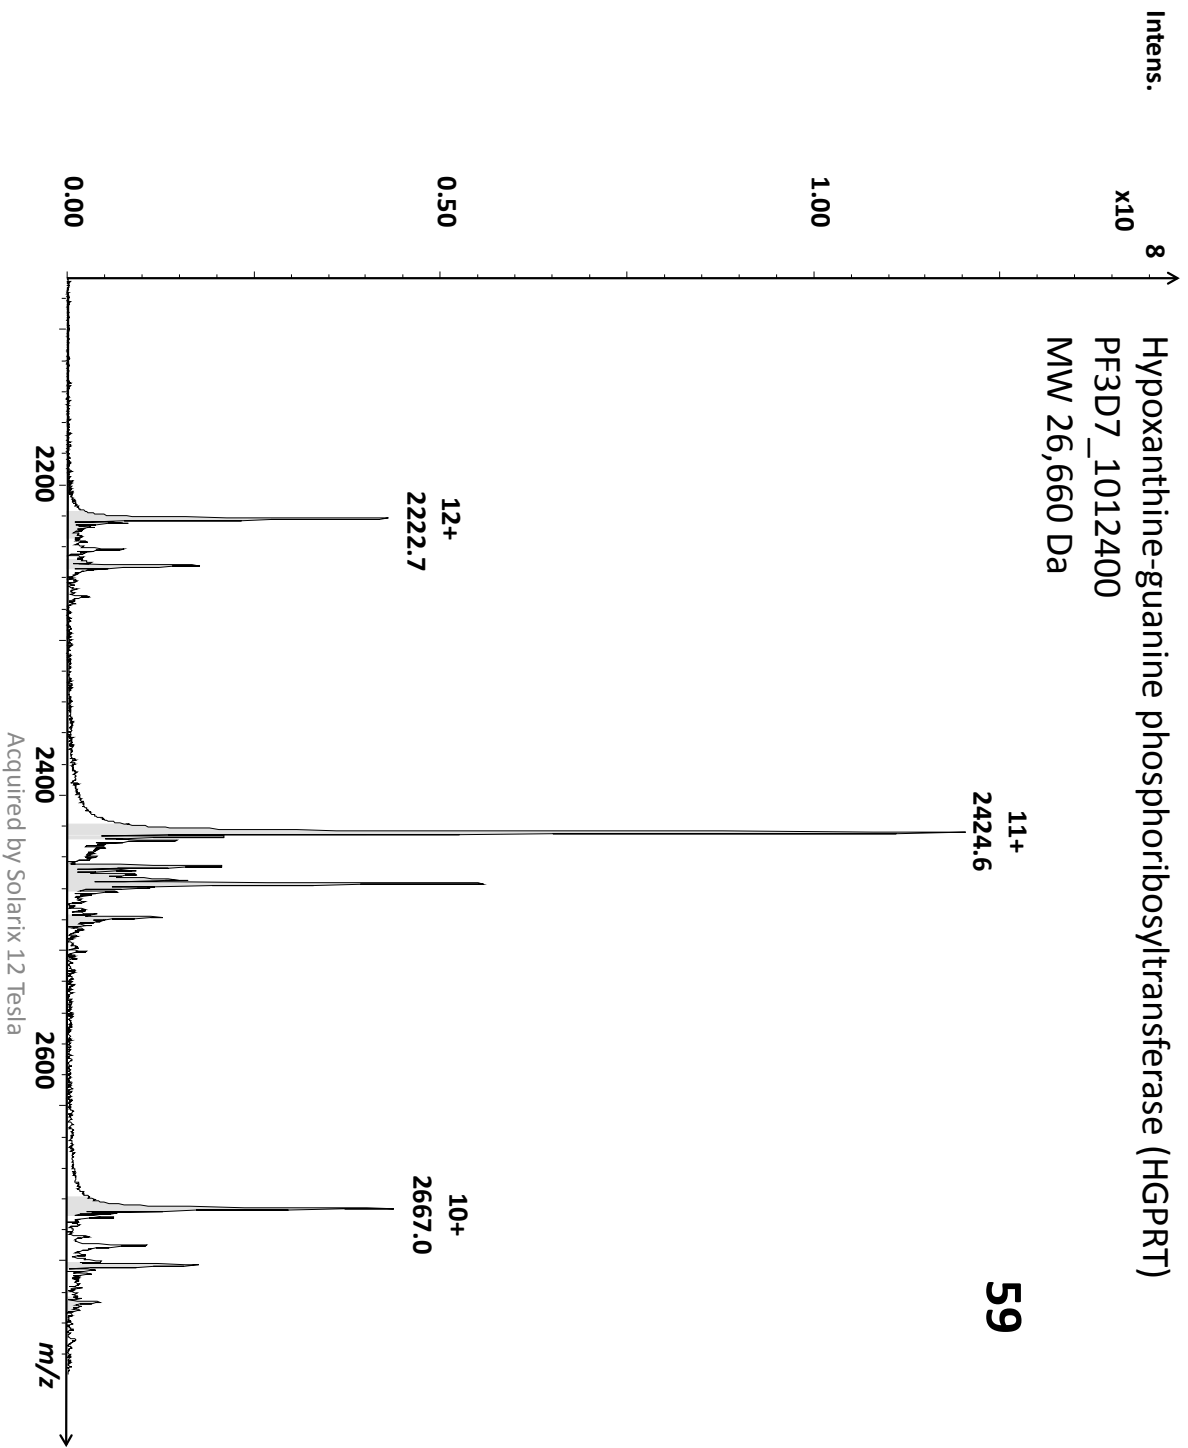



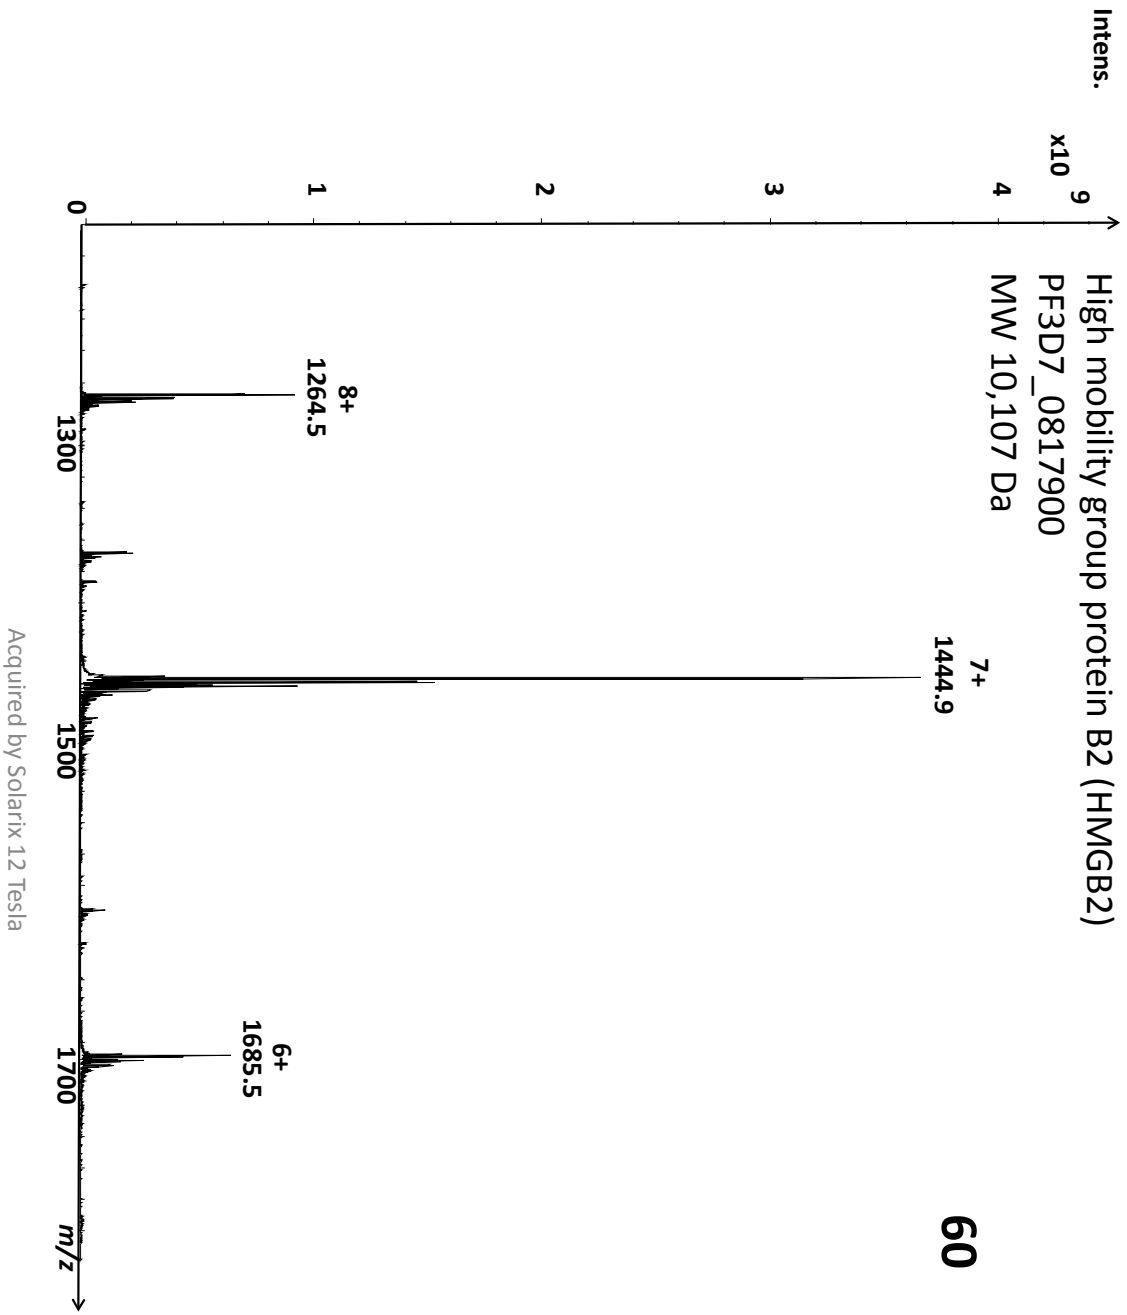

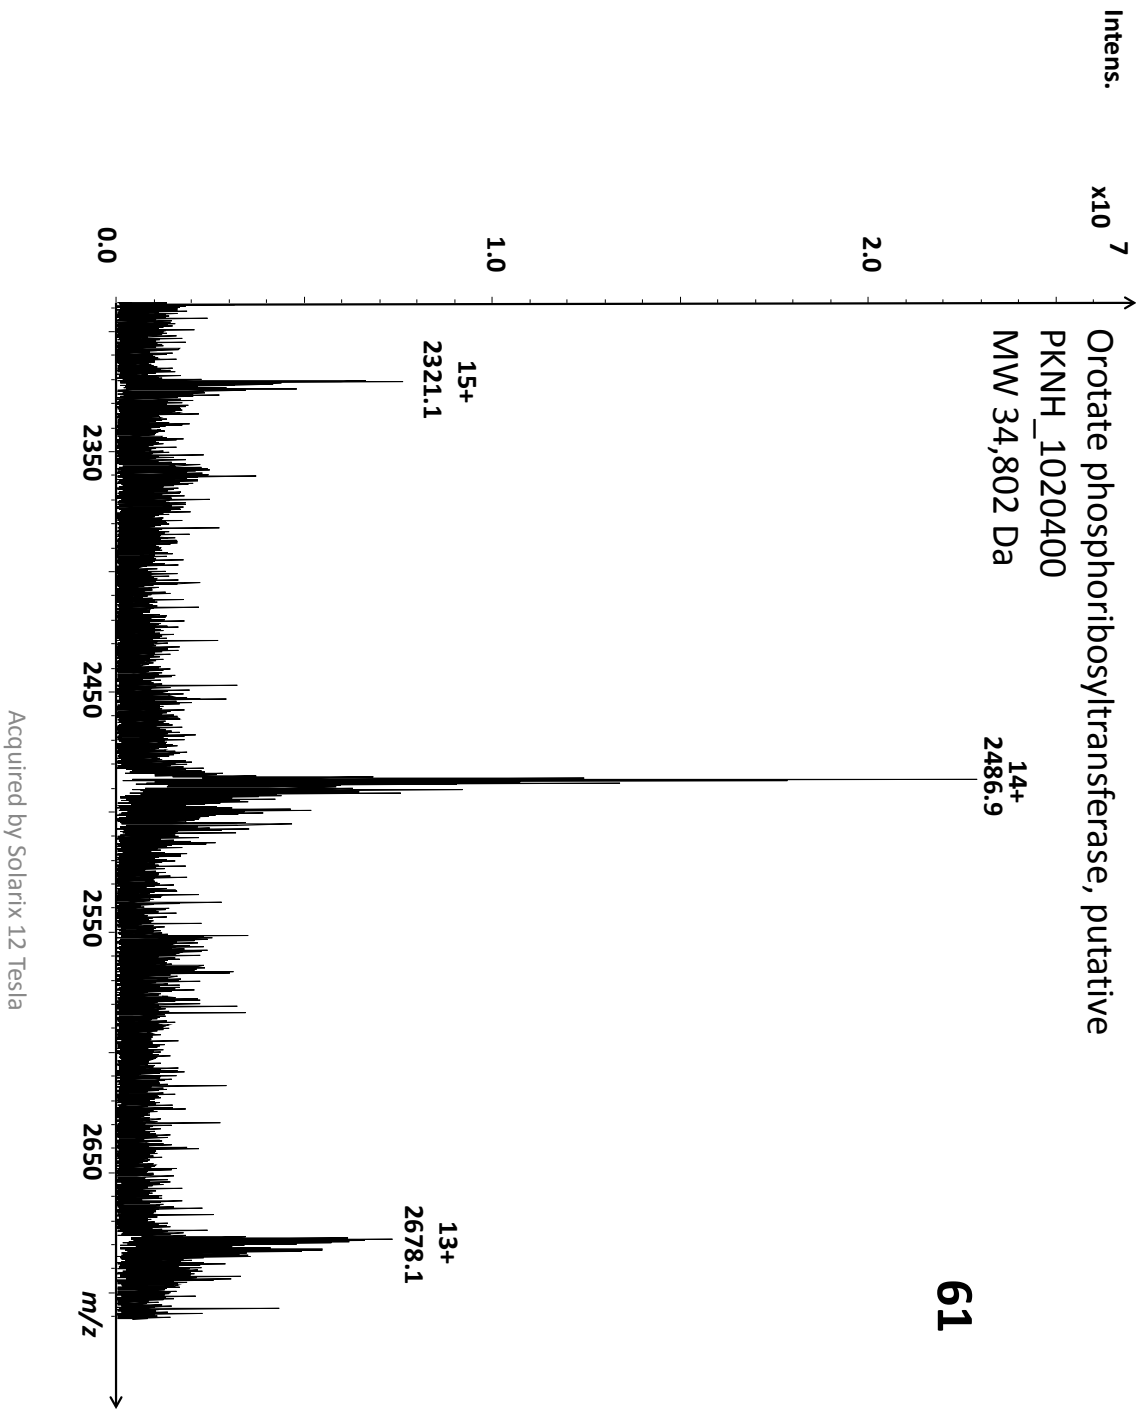

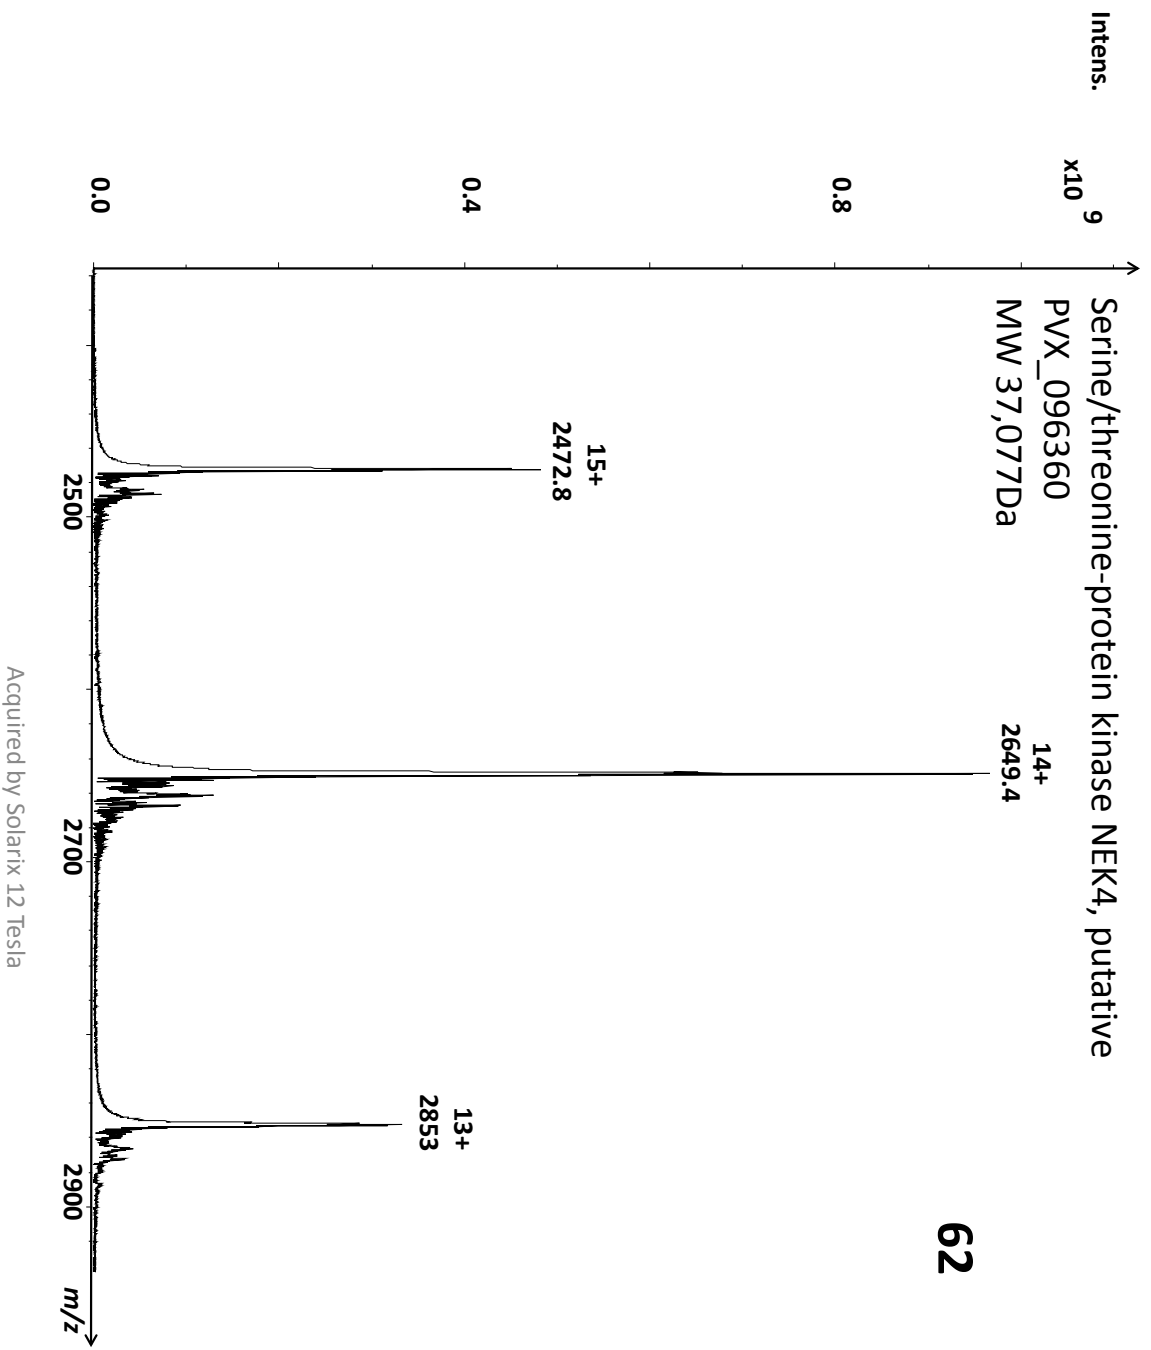

## REFERENCES

1. R. (2013) A Language and Environment for Statistical Computing, R Foundation for Statistical Computing: Vienna, Austria, 2013. <http://www.R-project.org/>.
2. Chen, H., and Boutros, P. C. (2011) VennDiagram: a package for the generation of highly-customizable Venn and Euler diagrams in R. *BMC Bioinformatics* 12, 35. DOI: 10.1186/1471-2105-12-35.
3. Wurst, M., Prikryl, Z., and Vokoun, J. (1984) High-performance liquid-chromatography of plant hormones: II. determination of plant hormones of the indole type. *J. Chromatogr. A* 286, 237-245. DOI: 10.1016/S0021-9673(01)99191-5.
4. Hohenschutz, L. D., Bell, E. A., Jewess, P. J., Leworthy, D. P., Pryce, R. J., Arnold, E., and Clardy, J. (1981) Castanospermine, a 1,6,7,8-tetrahydroxyoctahydroindolizine alkaloid, from seeds of *Castanospermum australe*. *Phytochemistry* 20, 811-814. DOI: 10.1016/0031-9422(81)85181-3.
5. Birkinshaw, J. H., Michael, S. E., Bracken, A., and Raistrick, H. (1943) Patulin in the common cold. Collaborative research on a derivative of *Penicillium patulum* Bainier. II. biochemistry and chemistry. *Lancet* 242, 625-630. DOI: 10.1016/S0140-6736(00)88176-3.
6. Pinhey, J. T., and Sternhell, S. (1965) Structure of  $\alpha$ -hydroxysantonin and some aspects of the stereochemistry of related eudesmanolides and guaianolides. *Aust. J. Chem.* 18, 543-557. DOI: 0.1071/ch9650543.
7. Endres, H. (1959) Constitution of the coloring matter of spruce bark, a new class of condensable tannin. *Qualitas Plantarum et Materiae Vegetabiles* 5, 367-374.
8. Grassmann, W., and Endres, H. (1965) The constitution of piceatannol. Comment on a paper by Cunningham, Haslam, and Haworth. *J. Chem. Soc.*, 4579. DOI: 10.1039/jr9650004579.
9. Nakajima, K., Taguchi, H., Endo, T., and Yosioka, I. (1978) The constituents of *Scirpus fluviatilis* (Torr.) A. Gray. I. the structures of two new hydroxystilbene dimers, scirpusin A and B. *Chem. Pharm. Bull.* 26, 3050-3057. DOI: 10.1248/cpb.26.3050.
10. Martin, D. G., Duchamp, D. J., and Chidester, C. G. (1973) Isolation, structure, and absolute configuration of U-42,126 a novel antitumor antibiotic. *Tetrahedron Lett.*, 2549-2552. DOI: 10.1016/s0040-4039(01)96202-1.
11. Clark, B. R., Capon, R. J., Lacey, E., Tennant, S., and Gill, J. H. (2006) Citrinin revisited: from monomers to dimers and beyond. *Org. Biomol. Chem.* 4, 1520-1528. DOI: 10.1039/b600960c.
12. Frenzel, M., and Dettner, K. (1994) Quantification of cantharidin in *Canthariphilous ceratopogonidae* (Diptera), Anthomyiidae (Diptera) and cantharidin-producing Oedemeridae (Coleoptera). *J. Chem. Ecol.* 20, 1795-1812. DOI: 10.1007/Bf02066223.
13. Govindachari, T. R., Joshi, B. S., and Kamat, V. N. (1965) Structure of parthenolide. *Tetrahedron* 21, 1509-1519. DOI: 10.1016/s0040-4020(01)98314-0.
14. Heptinstall, S., Awang, D. V. C., Dawson, B. A., Kindack, D., Knight, D. W., and May, J. (1992) Parthenolide content and bioactivity of feverfew (*Tanacetum parthenium* (L.) Schultz-Bip). Estimation of commercial and authenticated feverfew products. *J. Pharm. Pharmacol.* 44, 391-395. DOI: 10.1111/j.2042-7158.1992.tb03631.x.
15. Hendriks, H., Anderson-Wildeboer, Y., Engels, G., Bos, R., and Woerdenbag, H. J. (1997) The content of parthenolide and its yield per plant during the growth of *Tanacetum parthenium*. *Planta Med.* 63, 356-359. DOI: 10.1055/s-2006-957700.
16. Yoshimura, H. V., Z.; Wiesner, K. (1960) A rigorous proof of the selegaine structure. *Tetrahedron Lett.* 1, 14-17. DOI: 10.1016/S0040-4039(01)99306-2.

17. Liu, J. S., Zhu, Y. L., Yu, C. M., Zhou, Y. Z., Han, Y. Y., Wu, F. W., and Qi, B. F. (1986) The structures of huperzine A and B, two new alkaloids exhibiting marked anticholinesterase activity. *Can. J. Chem.* *64*, 837-839. DOI: 10.1139/v86-137.
18. Nishikawa, M., Tsurumi, Y., Namiki, T., Yoshida, K., and Okuhara, M. (1987) Studies on WF-3681, a novel aldose reductase inhibitor. I. Taxonomy, fermentation, isolation and characterization. *J. Antibiot. (Tokyo)*. *40*, 1394-1399. DOI: 10.7164/antibiotics.40.1394.
19. Reategui, R. F., Wicklow, D. T., and Gloer, J. B. (2006) Phaeofurans and sorbicillin analogues from a fungicolous *Phaeoacremonium* species (NRRL 32148). *J. Nat. Prod.* *69*, 113-117. DOI: 10.1021/np0504199.
20. Hikino, H., Sakurai, Y., Numabe, S., and Takemoto, T. (1968) Structure of curcumenol. *Chem. Pharm. Bull.* *16*, 39-42. DOI: 10.1248/cpb.16.39.
21. Bohlmann, F., Mahanta, P. K., Jakupovic, J., Rastogi, R. C., and Natsu, A. A. (1978) Naturally occurring terpene derivatives. Part 142. New sesquiterpene lactones from *Inula* species. *Phytochemistry* *17*, 1165-1172. DOI: 10.1016/s0031-9422(00)94308-5.
22. Yoshioka, H., Renold, W., Fischer, N. H., Higo, A., and Mabry, T. J. (1970) Sesquiterpene lactones from *Ambrosia confertiflora* (Compositae). *Phytochemistry* *9*, 823-832. DOI: 10.1016/s0031-9422(00)85188-2.
23. Herz, W., and Viswanathan, N. (1964) Constituents of *Iva* species. II. The structures of asperilin and ivasperin, two new sesquiterpene lactones. *J. Org. Chem.* *29*, 1022-1026. DOI: 10.1021/jo01028a009.
24. McMillan, C., Chavez, P. I., Plettman, S. G., and Mabry, T. J. (1975) Systematic implications of the sesquiterpene lactones in the strumarium morphological complex (*Xanthium strumarium*, Asteraceae) of Europe, Asia, and Africa. *Biochem. Syst. Ecol.* *2*, 181-184. DOI: 10.1016/0305-1978(75)90059-9.
25. Herz, W., Mitra, R. B., Rabindran, K., and Viswanathan, N. (1962) Constituents of *Helenium* species. XI. The structure of pinnatifidin. *J. Org. Chem.* *27*, 4041-4043. DOI: 10.1021/jo01058a068.
26. Beck, J., Gerlach, H., Prelog, V., and Voser, W. (1962) Metabolic products of actinomycetes. XXXV. Constitution of the macrotretrolides, monactin, dinactin, and trinactin. *Helv. Chim. Acta* *45*, 620-630.
27. Lou, Y., Zhao, F., Wu, Z., Peng, K.-F., Wei, X.-C., Chen, L.-X., and Qiu, F. (2009) Germacrane-type sesquiterpenes from *Curcuma wenyujin*. *Helv. Chim. Acta* *92*, 1665-1672. DOI: 10.1002/hlca.200900059.
28. Chang, F.-R., Hsieh, T.-J., Huang, T.-L., Chen, C.-Y., Kuo, R.-Y., Chang, Y.-C., Chiu, H.-F., and Wu, Y.-C. (2002) Cytotoxic constituents of the stem bark of *Neolitsea acuminatissima*. *J. Nat. Prod.* *65*, 255-258. DOI: 10.1021/np010236w.
29. Khafagy, S. M., Gharbo, S. A., and Sarg, T. M. (1971) Phytochemical investigation of *Artemisia herba alba*. *Planta Med.* *20*, 90-96. DOI: 10.1055/s-0028-1099670.
30. Arnone, A., Assante, G., Bava, A., Dallavalle, S., and Nasini, G. (2009) Acremines H-N, novel prenylated polyketide metabolites produced by a strain of *Acremonium byssoides*. *Tetrahedron* *65*, 786-791. DOI: 10.1016/j.tet.2008.11.058.
31. San Feliciano, A., Barrero, A. F., Medarde, M., Miguel del Corral, J. M., Ledesma, E., and Sanchez-Ferrando, F. (1982) Asteriscunolide A: humulanolide from *Asteriscus aquaticus*. *Tetrahedron Lett.* *23*, 3097-3100. DOI: 10.1016/s0040-4039(00)87542-5.
32. Jeremic, D., Jokic, A., Behbud, A., and Stefanovic, M. (1973) New type of sesquiterpene lactone isolated from *Artemisia annua*. Arteannuin B. *Tetrahedron Lett.*, 3039-3042. DOI: 10.1016/s0040-4039(01)96314-2.
33. Samek, Z., Holub, M., Drozd, B., Grabarczyk, H., and Hladon, B. (1977) On terpenes. CCXLVIII. Xerantholide - a new cytotoxically active sesquiterpenic lactone from

- Xeranthemum cylindraceum Sibth. et Smith. *Collect. Czech. Chem. Commun.* 42, 2441-2447. DOI: 10.1135/cccc19772441.
34. Bohlmann, F., Suwita, A., Natu, A. A., Czerson, H., and Suwita, A. (1977) Naturally occurring terpene derivatives, 106. Further  $\pm$ -longipinene derivatives from Composites. *Chem. Ber.* 110, 3572-3581.
35. Boustie, J., Moulis, C., Gleye, J., Fouraste, I., Servin, P., and Bon, M. (1990) A degraded limonoid from *Fagaropsis glabra*. *Phytochemistry* 29, 1699-1701. DOI: 10.1016/0031-9422(90)80152-7.
36. Achenbach, H., and Wittmann, G. (1970) Dihydrokawain-5-ol, a new alcohol from smoke pepper, *Piper methysticum*. *Tetrahedron Lett.*, 3259-3262.
37. Robinson, A., Kumar, T. V., Sreedhar, E., Naidu, V. G., Krishna, S. R., Babu, K. S., Srinivas, P. V., and Rao, J. M. (2008) A new sesquiterpene lactone from the roots of *Saussurea lappa*: structure-anticancer activity study. *Bioorg. Med. Chem. Lett.* 18, 4015-4017. DOI: 10.1016/j.bmcl.2008.06.008.
38. Chen, W. M. R., M.; Helmuth, Z.; Gerhard, R. (1989) A non-oxidized melampolide and other germacranolides from *Aristolochia yunnanensis*. *Phytochemistry* 28, 3233-3234. DOI: 10.1016/0031-9422(89)80315-2.
39. Somasekar, A. R. K., G. R.; Bhattacharyya, S. C. (1960) Terpenoids—XXI: The structure of costunolide, a new sesquiterpene lactone from costus root oil. *Tetrahedron* 9, 275-283. DOI: 10.1016/0040-4020(60)80017-8.
40. Hirota, A., Higashinaka, Y., and Sakai, H. (1978) Isolation of indolmycin and its derivative as antagonists of L-tryptophan. *Agric. Biol. Chem.* 42, 147-151. DOI: 10.1271/bbb1961.42.147.
41. Strunz, G. M., Kazinoti, P. I., and Stillwell, M. A. (1974) New chlorinated cyclopentenone produced by a *Cryptosporiopsis* species. *Can. J. Chem.* 52, 3623-3625. DOI: 10.1139/v74-541.
42. el-Ferally, F. S., and Chan, Y. M. (1978) Isolation and characterization of the sesquiterpene lactones costunolide, parthenolide, costunolide diepoxide, santamarine, and reynosin from *Magnolia grandiflora* L. *J. Pharm. Sci.* 67, 347-350. DOI: 10.1002/jps.2600670319.
43. Devivar, A. R., Cabrera, A., Ortega, A., and Romo, J. (1967) Constituents of *Zaluzania* species .2. structures of zaluzanin C and zaluzanin D. *Tetrahedron* 23, 3903-&. DOI: 10.1016/S0040-4020(01)97900-1.
44. Koizumi, F., Ishiguro, H., Ando, K., Kondo, H., Yoshida, M., Matsuda, Y., and Nakanishi, S. (2003) EI-1941-1 and -2, novel interleukin-1 beta converting enzyme inhibitors Produced by *Farrowia* sp. E-1941. II. Taxonomy of producing strain, fermentation, isolation, physico-chemical properties, and biological properties. *J Antibiot* 56, 603-609. DOI: 10.7164/antibiotics.56.464.
45. Tsuda, K., Tanabe, K., Iwai, I., and Funakoshi, K. (1957) Structure of alantolactone. *J. Am. Chem. Soc.* 79, 5721-5724. DOI: 10.1021/ja01578a037.
46. Tan, R. X., Tang, H. Q., Hu, J., and Shuai, B. (1998) Lignans and sesquiterpene lactones from *Artemisia sieversiana* and *Inula racemosa*. *Phytochemistry* 49, 157-161.
47. Xu, X.-H., Yao, G.-M., Li, Y.-M., Lu, J.-H., Lin, C.-J., Wang, X., and Kong, C.-H. (2003) 5-Fluorouracil derivatives from the sponge *Phakellia fusca*. *J. Nat. Prod.* 66, 285-288. DOI: 10.1021/np020034f.
48. Stanton, A. H. D., E. W.; Ralph, M.; Anderson, R. C.; Glen, E. A.; Nelson, R. E.; Dorothea, H.; Andrew, N. W.; Karl, F. (1944) Biotin. II. synthesis of biotin. *Biochemistry* 66, 1756-1757.

49. Veen, G., Gunther, S., Greinwald, R., Bachmann, P., Witte, L., Kustrak, D., and Czygan, F. C. (1992) Quinolizidine alkaloids in *Petteria ramentacea*. *Phytochemistry* 31, 3487-3490. DOI: 10.1016/0031-9422(92)83712-8.
50. Kim, K. H., Lee, I. K., Park, K. M., Kim, W. K., and Lee, K. R. (2008) Isolation of  $\beta$ -lactam alkaloids from the *Macrolepiota neomastoidea*. *Bull. Korean Chem. Soc.* 29, 1591-1593. DOI: 10.5012/bkcs.2008.29.8.1591.
51. Van Wyk, B. E., Verdoorn, G. H., and Schutte, A. L. (1988) Chemotaxonomic value of alkaloids in the genus *Dichilus*. *Biochem. Syst. Ecol.* 16, 471-474. DOI: 10.1016/0305-1978(88)90046-4.
52. Joshi, B. S., and Kamat, V. N. (1971) Structures of fischeric acid and isofischeric acid, two new desquiterpenes from *neolitsea-fischeri*. *Indian J. Chem.* 9, 80-83.
53. Levene, P. A., and London, E. S. (1929) The structure of thymonucleic acid. *J. Biol. Chem.* 83, 793-802.
54. Pirrung, M. C., Cao, J., and Chen, J. (1995) Ethylene biosynthesis: analog approach to the active-site topography of the ethylene-forming enzyme - novel hydroxamate inhibitors. *J. Org. Chem.* 60, 5790-5794. DOI: 10.1021/jo00123a012.
55. Fukagawa, M., Isogai, T., Aramori, I., Iwami, M., Kojo, H., Ono, T., Kohsaka, M., and Imanaka, H. (1991) Direct production of 7-aminodeacetylcephalosporanic acid by *Acremonium chrysogenum* Hm178. *Agric. Biol. Chem.* 55, 2163-2165. DOI: 10.1271/bbb1961.55.2163.
56. Baslas, K. K. (1955) Essential oil from *Prunella vulgaris*. *J. Indian Chem. Soc.* 32, 228-230.
57. van Zyl, R. L., Seatlholo, S. T., van Vuuren, S. F., and Viljoen, A. M. (2006) The biological activities of 20 nature identical essential oil constituents. *J. Essent. Oil Res.* 18, 129-133.
58. Ehrenberg, A. Alkaloids of calabar beans. *Verh. Vers. deutsch. Naturf. u. Artze.* ii, 102.
59. Cassal, J. M. F., A.; Meier, W. (1976) Synthese der enantiomeren 2-Pyrrolidinessigsäuren. *Helv. Chim. Acta* 59, 1917-1924. DOI: 10.1002/hlca.19760590602.
60. Clement, B. A., Goff, C. M., and Forbes, T. D. A. (1998) Toxic amines and alkaloids from *Acacia rigidula*. *Phytochemistry* 49, 1377-1380. DOI: 10.1016/s0031-9422(97)01022-4.
61. Orekhov, A. P., Proskurnina, N., and Konovalova, R. (1935) Sophora alkaloids. VIII. Alkaloids from the seeds and the foliage of *Sophora alopecuroides*. *Berichte der Deutschen Chemischen Gesellschaft [Abteilung] B: Abhandlungen* 68B, 431-436.
62. Yahara, S., Uda, N., Yoshio, E., and Yae, E. (2004) Steroidal alkaloid glycosides from tomato (*Lycopersicon esculentum*). *J. Nat. Prod.* 67, 500-502. DOI: 10.1021/np030382x.
63. Ogita, T., Sato, A., Enokita, R., Suzuki, K., Ishii, M., Negishi, T., Okazaki, T., Tamaki, K., and Tanzawa, K. (1992) Matlystatins, new inhibitors of typeIV collagenases from *Actinomyces* *atramentaria*. I. Taxonomy, fermentation, isolation, and physico-chemical properties of matlystatin-group compounds. *J. Antibiot* 45, 1723-1732. DOI: 10.7164/antibiotics.45.1723.
64. Takaku, T., Kameda, K., Matsuura, Y., Sekitani, K., Okuda, T., and Okai, H. (1988) Isolation and structure of insulin-like substances from ginseng. *Wakan Iyaku Gakkaishi* 5, 544-545.
65. Bell, E. A., Nulu, J. R., and Cone, C. (1971) L-Dopa and L-3-carboxy-6,7-dihydroxy-1,2,3,4-tetrahydroisoquinoline, a new imino acid, from seeds of *Mucuna mutisiana*. *Phytochemistry* 10, 2191-2194. DOI: 10.1016/s0031-9422(00)97217-0.
66. Guella, G., N'Diaye, I., Fofana, M., and Mancini, I. (2006) Isolation, synthesis and photochemical properties of almazolone, a new indole alkaloid from a red alga of Senegal. *Tetrahedron* 62, 1165-1170. DOI: 10.1016/j.tet.2005.10.072.

67. Behr, L. D. C., H. T. . (1932) l-p-Mehoxyphenylalanine. *J. Am. Chem. Soc.* 54, 1630-1634.
68. Canonica, L. B., B.; Bonati, A.; Tedeschi, C. (1955) Synthetic analeptics. I. Hydroxybenzoic acid diethylamides. *Annali di Chimica (Rome, Italy)* 45, 205-215.
69. Sperry, J., Gibson, J. S., Sejberg, J. J. P., and Brimble, M. A. (2008) Enantioselective synthesis of the dimeric pyranonaphthoquinone core of the cardinalins using a late-stage homocoupling strategy. *Organic & Biomolecular Chemistry* 6, 4261-4270. DOI: 10.1039/b813605j.
70. Carroll, A. R., Pierens, G. K., Fechner, G., de Leone, P., Ngo, A., Simpson, M., Hyde, E., Hooper, J. N. A., Bostroem, S.-L., Musil, D., and Quinn, R. J. (2002) Dysinosin A: A novel inhibitor of factor VIIa and thrombin from a new genus and species of Australian sponge of the family Dysideidae. *J. Am. Chem. Soc.* 124, 13340-13341. DOI: 10.1021/ja020814a.
71. Gu, L., Wang, S., Li, X., and Zhu, T. (1987) Antibacterial constituents from *Gerbera anandria* (L.) Sch. Bip. *Yaoxue Xuebao* 22, 272-277.
72. Xiao, Y., Li, J., and Ding, Y. (2002) Studies on chemical constituents in roots and rhizomes of *Gerbera piloselloides*. *Zhongguo Zhongyao Zazhi* 27, 594-596.
73. Tyler, V. E., Jr., and Groger, D. (1964) Occurrence of 5-hydroxytryptamine and 5-hydroxytryptophan in *Panaeolus sphinctrinus*. *J. Pharm. Sci.* 53, 462-463. DOI: 10.1002/jps.2600530433.
74. Kawahara, N., Nozawa, K., Nakajima, S., Udagawa, S., and Kawai, K. (1988) Studies on fungal products. XVI. New metabolites related to 3-methylorsellinate from *Aspergillus silvaticus*. *Chem. Pharm. Bull.* 36, 398-400. DOI: 10.1248/cpb.36.398.
75. Lloyd, H. A. (1965) Astrocasin, a new Euphorbiaceae alkaloid. *Tetrahedron Lett.*, 1761-1767. DOI: 10.1016/s0040-4039(00)90124-2.
76. Henry, A. J., and King, H. (1950) Isolation and identification of (-)-stachydrine ethyl ester periodide from the root of *Courbonia virgata*. *J. Chem. Soc.*, 2866-2868. DOI: 10.1039/jr9500002866.
77. Alvi, K. A., Peters, B. M., Hunter, L. M., and Crews, P. (1992) 2-Aminoimidazoles and their zinc complexes from indo-pacific *Leucetta* sponges and *Notodoris nudibranchs*. *Tetrahedron* 49, 329-336. DOI: 10.1016/s0040-4020(01)80302-1.
78. Quinn, R. J. (unpublished).
79. Iketubosin, G. O., and Mathieson, D. W. M. (1963) The isolation of hordenine and norsecurinine from *Securinega virosa* (Baill) - structure of norsecurinine. *J. Pharm. Pharmacol.* 15, 810-815. DOI: 10.1111/j.2042-7158.1963.tb12885.x.
80. Saito, S., Tanaka, T., Kotera, K., Nakai, H., Sugimoto, N., Horii, Z., Ikeda, M., and Tamura, Y. (1965) Absolute stereochemistry at C-9a of norsecurinine and dehydronorsecurinine. *Chem. Pharm. Bull.* 13, 614-616.
81. Saito, S., Tanaka, T., Iwamoto, T., Matsumura, C., Sugimoto, N., Horii, Z., Makita, M., Ikeda, M., and Tamura, Y. (1964) Determination of securinine and its stereoisomers in plants of the *Securinega* species, and isolation of viroallosecurinine and virosine. *Yakugaku Zasshi.* 84, 1126-1133.
82. Yuan, W., Zhu, P., Cheng, K. D., Meng, C., Ma, L., Wu, F., and Zhu, H. X. (2007) Callus of *Securinega suffruticosa*, a cell line accumulates dextro *Securinega* alkaloids. *Nat. Prod. Res.* 21, 234-242. DOI: 10.1080/14786410701189781.
83. Zhu, J. P., Chastanet, J., and Beugelmans, R. (1996) Selective hydroxy group protection of gallic acid. *Synth. Commun.* 26, 2479-2486. DOI: 10.1080/00397919608004560.
84. Parello, J. (1968) Structure of phyllanthine, a minor alkaloid from *Phyllanthus discoides* Meull. Arg. (Euphorbiacees). *Bull. Soc. Chim. Fr.* 3, 1117-1129.



85. Hassarajani, S. A., and Mulchandani, N. B. (1990) Securinine type of alkaloids from *Phyllanthus niruri*. *Indian Journal of Chemistry, Section B: Organic Chemistry Including Medicinal Chemistry* 29B, 801-803.
86. Nakano, T., Yang, T. H., and Terao, S. (1963) Alkaloids of *Securinega virosa*. I. Structure of virosecurinine. *Tetrahedron* 19, 609-619. DOI: 10.1016/s0040-4020(01)98547-3.
87. Vu, H., Roullier, C., Campitelli, M., Trenholme, K. R., Gardiner, D. L., Andrews, K. T., Skinner-Adams, T., Crowther, G. J., Van Voorhis, W. C., and Quinn, R. J. (2013) *Plasmodium* gametocyte inhibition Identified from a natural-product-based fragment library. *ACS Chem. Biol.* 8, 2654-2659. DOI: 10.1021/cb400582b.
88. El-Masry, S., Hammada, H. M., Zaatout, H. H., Alqasoumi, S. I., and Abdel-Kader, M. S. (2010) Constituents of *Erythrina caffra* stem bark grown in Egypt. *Nat. Prod. Sci.* 16, 211-216.
89. Wang, Z. G., Wang, X. J., Sun, H., Chen, L., and Ma, C. M. (2012) Determination of novel nitrogen-containing metabolite after oral administration of swertiamarin to rats. *J. Asian Nat. Prod. Res.* 14, 176-181. DOI: 10.1080/10286020.2011.631132.
90. Katavic, P. L., Venables, D. A., Forster, P. I., Guymer, G., and Carroll, A. R. (2006) Grandisines C-G, indolizidine alkaloids from the Australian rainforest tree *Elaeocarpus grandis*. *J. Nat. Prod.* 69, 1295-1299. DOI: 10.1021/np060179c.
91. Ulubelen, A., Guner, H., and Cetindag, M. (1988) Alkaloids and coumarins from the roots of *Ruta-chalepensis* var *latifolia*. *Planta Med.*, 551-552.
92. Wehrli, H. (1980) Zur photocyclisierung von N-phenacylformamiden. *Helv. Chim. Acta* 63, 1915-1919. DOI: 10.1002/hlca.19800630718.
